# Supplementary material for: Effective reconstruction of functional organotypic kidney spheroid for in vitro nephrotoxicity studies
Source: PubMed Central journal article supplement (PMC6879515; doi:10.1038/s41598-019-53855-2), 2019-11-26
Supplement: 41598_2019_53855_MOESM1_ESM.pdf [file 41598_2019_53855_MOESM1_ESM.pdf]

Effective reconstruction of functional organotypic kidney spheroid  
for *in vitro* nephrotoxicity studies

Hyun Mi Kang<sup>1\*</sup>, Jung Hwa Lim<sup>1\*</sup>, Kyung Hee Noh<sup>1</sup>, Dongmin Park<sup>1</sup>, Hyun-Soo Cho<sup>2</sup>,  
Katalin Susztak<sup>3</sup>, Cho-Rok Jung<sup>1,4</sup>.

<sup>1</sup>Laboratory of Disease Modeling and Therapeutics, Korea Research Institute of  
Bioscience and Biotechnology, Daejeon, Republic of Korea.

<sup>2</sup>Stem Cell Research Center, Korea Research Institute of Bioscience and  
Biotechnology, Daejeon, Republic of Korea.

<sup>3</sup>Division of Nephrology, Department of Medicine, Department of Genetics, Perelman  
School of Medicine, University of Pennsylvania, Philadelphia, PA, USA

<sup>4</sup>Department of Functional Genomics, Korea University of Science and Technology,  
Daejeon, Republic of Korea.

\* These author contributed equally to this work.

Correspondence and requests for materials should be addressed to Katalin Susztak  
([ksusztak@penmedicine.upenn.edu](mailto:ksusztak@penmedicine.upenn.edu)) or Cho-Rok Jung ([crjung@kribb.re.kr](mailto:crjung@kribb.re.kr)).

## **Supplemental information**

### **Supplemental figure 1. Characterization of immortalized cells derived from mouse kidney.**

**a.** Schematic diagram of the isolation and immortalization of cells with high proliferative capacity. **b-c.** hTERT (b) and SV40 (c) expression in immortalized cells at different passage. **d.** Cumulative doubling numbers for three primary cell lines and three immortalized cell lines throughout *ex vivo* expansion. **e.** Relative transcript levels of mesenchymal stem cell markers in mouse kidney (mKidney), and immortalized cells at the fifth and 15th passages. n=3 of each group. All data are shown as the means  $\pm$  s.e.m. \*P<0.05 compared to mKidney by unpaired Student's t test.

### **Supplemental figure 2. Characterization of primary cells derived from mouse kidney.**

**a.** Morphology of mouse tubular epithelial cells during *in vitro* culture. Cell changed their morphology to fibroblast like cells after passage 4. **b.** Quantitative RT-PCR analysis of EMT markers such as vimentin, fibronectin and e-cadherin in mouse cells at the primary, and 4<sup>th</sup> passages. n=3 of each group. **c.** Related mRNA levels of kidney segment specific markers in the cell at primary, 1<sup>st</sup> and 3<sup>rd</sup> passage. n=3 of each group. All data are shown as the means  $\pm$  s.e.m. \*P<0.05 compared to primary cells by unpaired Student's t test.

### **Supplemental figure 3. Characterization of single segment depletion cells from immortalized cells.**

**a.** Morphology of single segment depletion cells after magnetic activated cell sorting. Cells were maintained same methods used for culturing immortalized cells. Cell of

AQP1 or THP depletion cells changed their morphology to fibroblast like cells. **b.** Quantitative RT-PCR analysis of AQP1, AQP2, podocin (PODO), and THP to show to lose of single marker in the depletion cells. **c.** FACS analysis of tubule segment markers in AQP1, AQP2, podocin or THP depletion cells. CTL cells (open black histograms) and each marker depletion cells (open red histograms) were stained with anti-AQP1, AQP2, podocin or THP or isotype control mAb (grey histograms).

**Supplemental figure 4. Analysis of multiple renal progenitor cells in immortalized cells at early and late passage.**

FACS analysis of renal progenitor cells markers such as Cd133 and Sox9 (a) and ureteric bud epithelial cell marker as Hoxb7 (b) in mouse immortalized cells at early (4<sup>th</sup> passage) and late (16<sup>th</sup> passage) passage. **a.** Fluorescence data from cells at 4<sup>th</sup> and 16<sup>th</sup> passage clarifies which cells expressed renal progenitor cells markers, Cd133 and Sox9. The percentage of immortalized cells express only Cd133, only Sox9, or both was presented in right table. **b.** Fluorescence data from cells at 4<sup>th</sup> and 16<sup>th</sup> passage clarifies which cells expressed Cd133 and Hoxb7. The percentage of immortalized cells express only CD133, only Hoxb7, or both was presented in right table.

**Supplemental figure 5. Characterization of immortalized cells derived from human kidney.**

**a.** Morphology of human tubular epithelial cells during *in vitro* expansion. **b.** Quantitative RT-PCR analysis of kidney-specific segment markers in immortalized human cells at 1<sup>st</sup> and at the 6<sup>th</sup> passage. n=3 each group. **c.** Representative images of immunostaining of human primary cells at 2<sup>nd</sup> passage and immortalized cells at 6<sup>th</sup> passage for LTL, PNA, AQP2, and nephrin. **d.** GGT activity of human immortalized

primary cells compared to a human primary tubular epithelial cells (hPTECs). n=6 hPTECs and n=8 human renal primary cells. **e.** Dextran uptake by human immortalized cells at 3rd passage after 48 h incubation with Alexa Fluor 488-conjugated dextran. All data are shown as the means  $\pm$  s.e.m. \* $p$ <0.05 compared to hPTECs cells by unpaired Student's *t* test. Scale bar, 20 $\mu$ m.

**Supplemental figure 6. Characterization of cell aggregates and kidney spheroids embedded gel matrix derived from immortalized primary cells using spheroid forming unit (SFU) protocol.**

**a-c.** Relative mRNA expression of kidney segment specific markers (a), basolateral (b) and apical (c) transporters in cell aggregates using SFU (combination of hanging-drop and rotation) compared to 2D cultured cells. n=6 of 2D cells and cell aggregates. **d.** Representative images of mouse kidney spheroids embedded ECM gel (Sigma), matrigel or mixture of ECM and matrigel as 2:1 ratio at day 5 after SFU stained with hematoxylin and eosin (H&E). The tubular structures were marked by a red arrow in the image. **e.** Gel mixture only (left) and cell-embedded gel mixture after 5 days of maturation (right). **f.** Related mRNA levels of kidney segment specific markers in the kidney spheroid embedded in the mixture of ECM and matrigel compared to spheroids embedded in matrigel. **g-h.** Quantitative RT-PCR analysis of basolateral (g) and apical (h) transporters in kidney spheroids cultured in the various combination of maturation factors for 5 days. CTL means kidney spheroids without factors, DIVE means kidney spheroids cultured in DMEM/F12 supplemented with 10% FBS, 1X ITS, 20 ng/mL epidermal growth factor (EGF), 100 nM dexamethasone, and 20 uM 1 $\alpha$ ,25-Dihydroxyvitamin D3, VR means kidney spheroids cultured in DMEM/F12 supplemented with 10% FBS, 20 uM 1 $\alpha$ ,25-Dihydroxyvitamin D3 and 5  $\mu$ M all-trans



retinoic acid (ATRA) and DIVER-DIVE means kidney spheroids cultured in DMEM/F12 supplemented with 10% FBS, 1X ITS, 20 ng/mL epidermal growth factor (EGF), 100 nM dexamethasone, 20 uM 1 $\alpha$ ,25-Dihydroxyvitamin D3 and 5  $\mu$ M all-trans retinoic acid (ATRA) for 6h then cultured in same medium with our ATRA. n=3 of each group. All data are shown as the means  $\pm$  s.e.m. \*P<0.05 compared to cells embedded matrigel by unpaired Student's *t* test.

**Supplemental figure 7. Gene Set Enrichment Analysis (GSEA) generated by RNA-seq analysis from kidney spheroids.**

The gene expression data generated by RNA-seq was analyzed using GSEA to extract biological knowledge. Highly, significant enriched gene-sets are shown here. **a.** GSEA analysis highlighting strong enrichment for the glutathione metabolism (left) and heatmap analysis of the expression of transcripts related to glutathione metabolism (right). **b.** GSEA analysis highlighting strong enrichment for the sulfur compound metabolic process (left) and heatmap analysis of the expression of transcripts related to sulfur compound metabolic process (right). **c.** GSEA analysis highlighting strong enrichment for response to toxic substance (left) and heatmap analysis of the expression of transcripts related to response to toxic substance (right).

**Supplemental figure 8. Effects of shear stress by SFU culture condition on kidney spheroid maturation.**

**a-b.** Relative mRNA (a) and protein (b) expression of ER stress markers such as XBP-1, AFT4, ATF6, and CHOP at 1, 3, 6, and 24 hours of SFU protocol compared to spheroids cultured in static medium for 24 hours (0h of SFU). n=3 of each time point. **c-d.** Quantitative mRNA expression related to early renal progenitor markers (c) and mature segment marker (d) at 1, 3, 6, 24, 48 and 72 hours of SFU protocol compared

to spheroids cultured in static medium for 24 hours (0h of SFU). n=4 of each time point. **e.** Promoter sequence of WT1 and transcription factor binding sites identified in the box. Binding motif of XBP-1 identified in the red. **f.** Promoter sequence of AQP1 and transcription factor binding sites identified in the box. Binding motif of WT1 identified in the red. **g.** Western blot analysis to show the sequential expression of XBP-1, WT1, and AQP1 at the different time point of SFU protocol. **h.** Summary animation of findings that SFU induced the renal spheroid maturation. All data are shown as the means  $\pm$  s.e.m. \*P<0.05 compared to spheroid at 0h of SFU protocol by unpaired Student's *t* test.

### **Supplemental figure 9. Reproducibility human kidney spheroids**

**a.** FACS analysis of tubule segment markers in human kidney spheroid (hKidS) generated by immortalized cells at the 4<sup>th</sup> and 13<sup>th</sup> passages. Kidney spheroid at the 4<sup>th</sup> and 13<sup>th</sup> passages were stained with anti-AQP1, PNA, Nephrin, or AQP2 (open histograms), or isotype control mAb (grey histograms). **b.** Quantitative RT-PCR analysis of kidney-specific segment markers in hKidS generated by cells at the 4<sup>th</sup> and 13<sup>th</sup> passage compared with 2D controls (2D CTL). n = 6 for 2D CTL and n = 5 for hKidS at the 4<sup>th</sup> and 20<sup>th</sup> passages. **c-d.** Relative mRNA expression of apical (c) and basolateral (d) transporters in hKidS at the 4<sup>th</sup> and 13<sup>th</sup> passages compared with 2D cultured cells. n = 6 for 2D CTL and n = 5 for hKidS at the 4<sup>th</sup> and 13<sup>th</sup> passages. **e.** Responses to parathyroid hormone (PTH) of hKidS at the 4<sup>th</sup> and 13<sup>th</sup> passages compared to 3D CTL. **f.** GGT activity in hKidS at the 4<sup>th</sup> and 13<sup>th</sup> passages compared to 3D CTL. n = 5 for 3D CTL and hKidS at the 4<sup>th</sup> and 13<sup>th</sup> passages for e-f. All data are shown as the means  $\pm$  s.e.m. \*p < 0.05 compared with 2D or 3D control by unpaired Student's *t*-test. Scale bar, 20  $\mu$ m.

**Supplemental figure 10. Assessments of stability and extended culture effects of human kidney spheroids.**

**a.** Relative mRNA expression of kidney segment specific markers in human kidney spheroids (hKidS) for 21 days (at day 0, 3, 7, 14, and 21) after maturation compared to 2D cultured cells (CTL). n=3 of 2D cells and hKidS at each time point. **b.** Response to parathyroid hormone (PTH) of long-term cultured hKidS at 0d, 3d, 7d, 14d, and 21d compared with 3D control spheroids (without maturation factors, CTL). n = 4 of 3D CTL and hKidS each time point. **c.** GGT activity in hKidS after 21 days of maturation compared to 3D CTL. n=3 of CTL and hKidS at each time point, respectively. **d.** Dextran-fluorescein uptake of long-term cultured hKidS compare to 3D CTL. N = 3 of 3D CTL and hKidS at each time point, respectively. **e.** Apoptosis profile by MUSE analyzer in hKidS at the different time point of extended culture after maturation incubated with 20  $\mu$ M cisplatin (CPT). Cell viability assay was performed by the Muse Count & Viability reagent (Millipore) following the manufacturer's protocols. The results were obtained with Muse Count & Viability software module and the statistics were shown as the percentage of viable cells and annexin V-positive apoptotic cells. All data are shown as the means  $\pm$  s.e.m. \*P<0.05 compared to untreated control by unpaired Student's *t* test.

**Supplemental figure 11. Assessment of response to nephrotoxicants in kidney spheroids.**

**a.** Live/dead stained images of mouse kidney spheroids incubated with 100 $\mu$ M acyclovir for 24 h. **b.** Relative mRNA expression of kidney injury markers such as *Hacvr1*, *Lcn2*, and *clusterin* after 40 $\mu$ M or 100 $\mu$ M acyclovir treatment compare to

untreated spheroids. n=4 of each group. **c.** Live/dead stained images of mouse kidney spheroids incubated with 7.5 uM for 24 h. **d.** Relative mRNA expression of kidney injury markers such as Hacvr1, Lcn2, and clusterin after 3uM or 7.5uM doxorubicin treatment compared to untreated control. n=4 of each group All data are shown as the means  $\pm$  s.e.m. \*P<0.05 compared to untreated control by unpaired Student's *t* test.

**Supplemental figure 12. Assessment of spheroid-to-spheroid variation response to nephrotoxicants in kidney spheroids.**

Apoptosis profile by MUSE analyzer in there different single a mouse kidney spheroid incubated with 50  $\mu$ M cyclosporin A or cisplatin for 24 h. Cell viability assay was performed by the Muse Count & Viability reagent (Millipore) following the manufacturer's protocols. The results were obtained with Muse Count & Viability software module and the statistics were shown the percentage of viable cells and annexin V positive apoptotic cells.

**Supplemental Table I. Sequences of oligonucleotide primers used for qPCR.**

**Supplemental Table II. The list of differentially expressed genes when 2D cells and mouse kidney spheroids (mKidS) were compared.**

**a**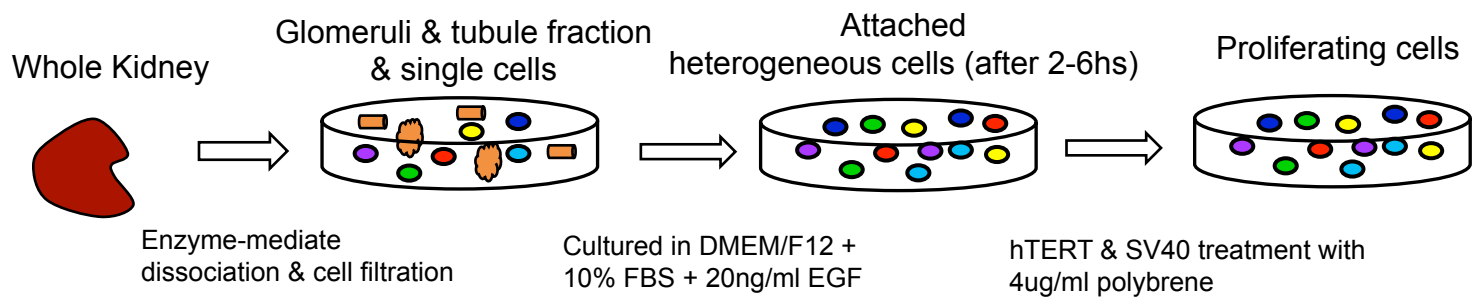**b**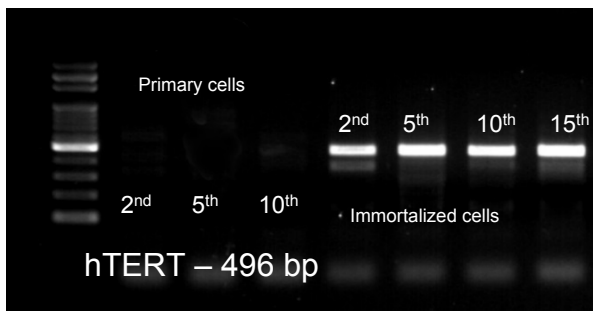**c**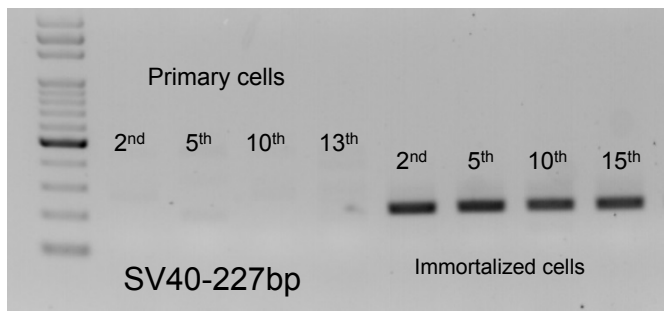**d**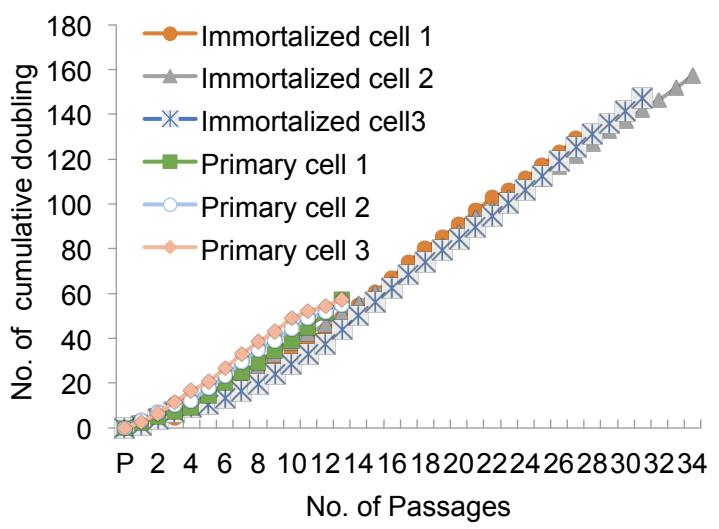**e**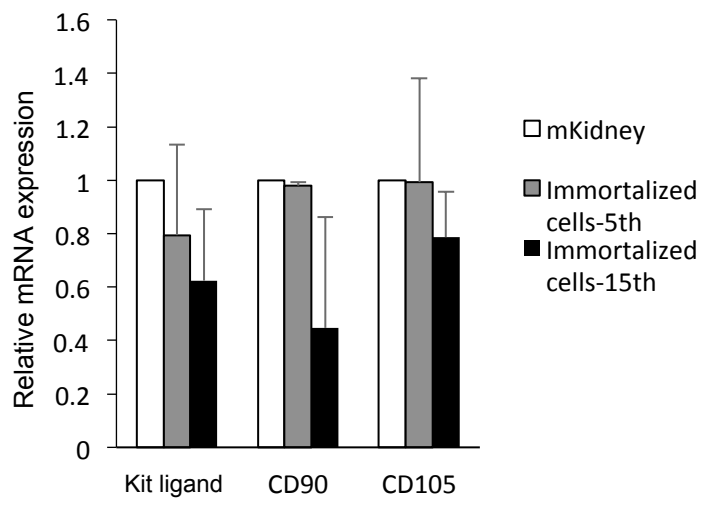

**a**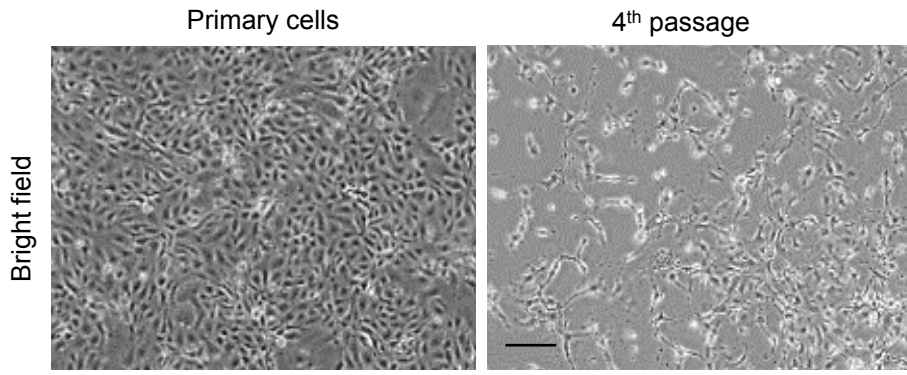**b**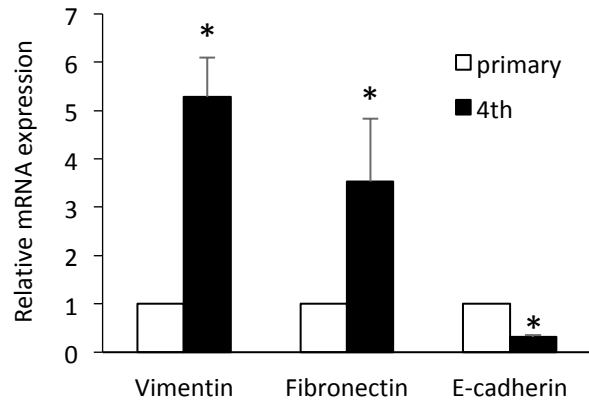**c**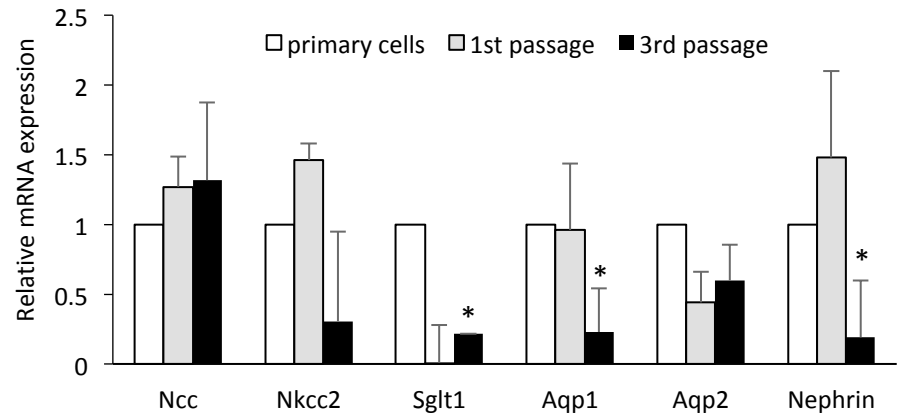

**a**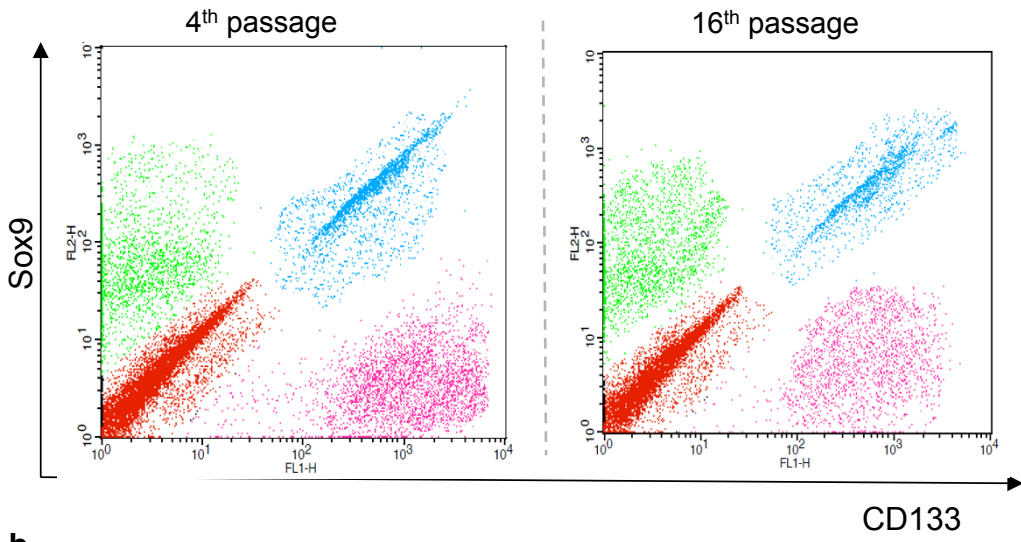

|              | 4 <sup>th</sup> | 16 <sup>th</sup> |
|--------------|-----------------|------------------|
| CD133+ only  | 21.3%           | 15.7%            |
| Sox9+ only   | 18.4%           | 19.2%            |
| CD133+ Sox9+ | 16.3%           | 14.3%            |

**b**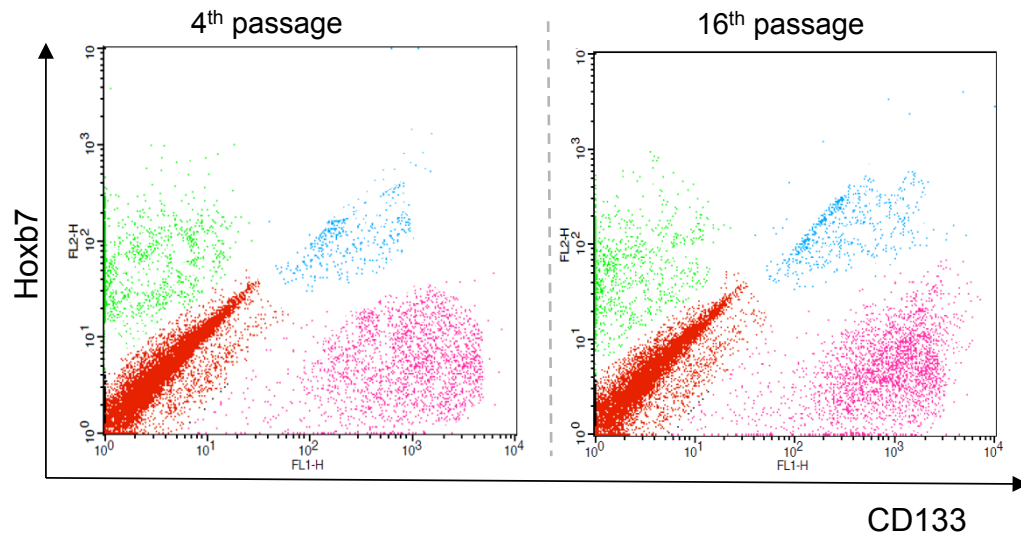

|               | 4 <sup>th</sup> | 16 <sup>th</sup> |
|---------------|-----------------|------------------|
| CD133+ only   | 19.2%           | 16.9%            |
| Hoxb7+ only   | 8.1%            | 9.4%             |
| CD133+ Hoxb7+ | 4.5%            | 5.9%             |

**a**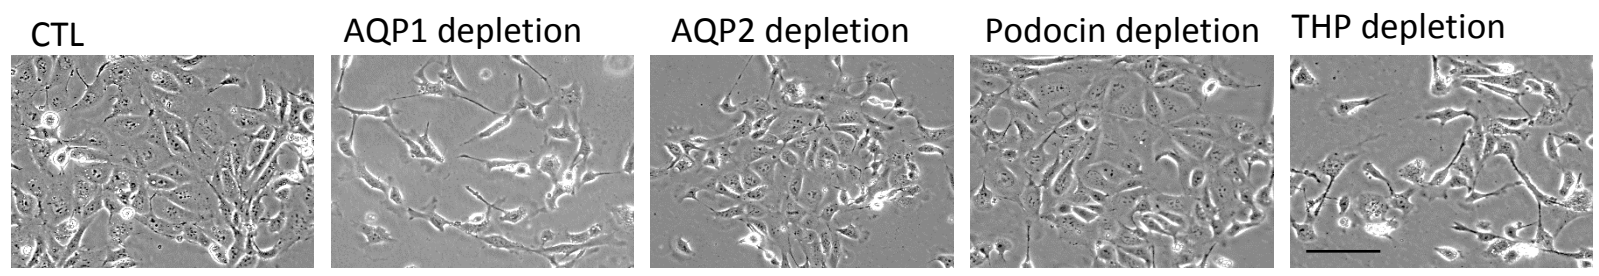**b**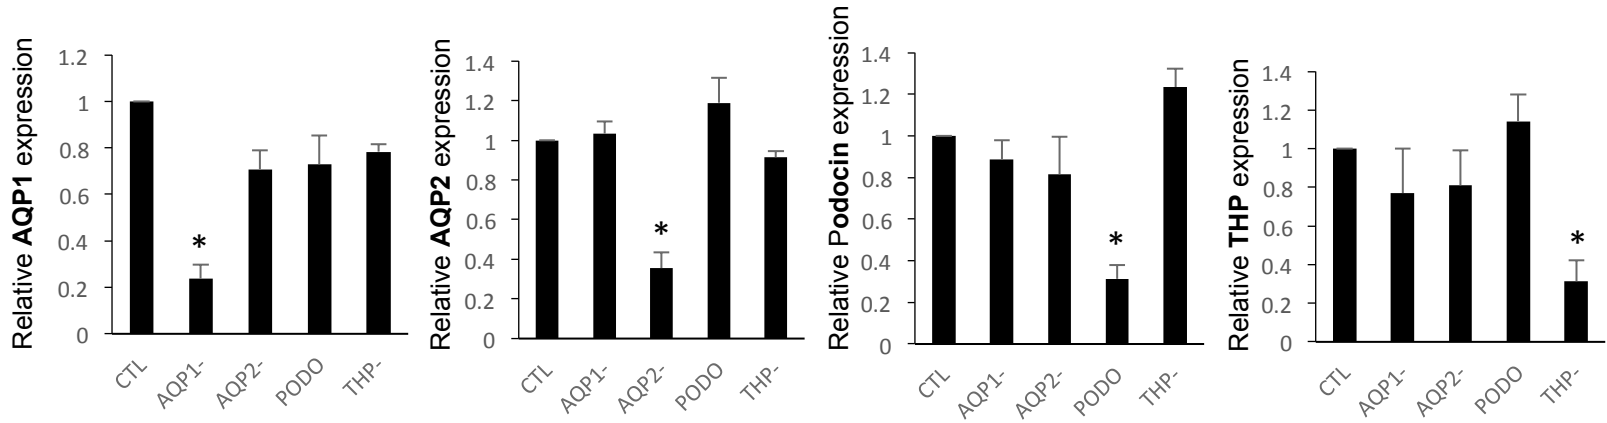**c**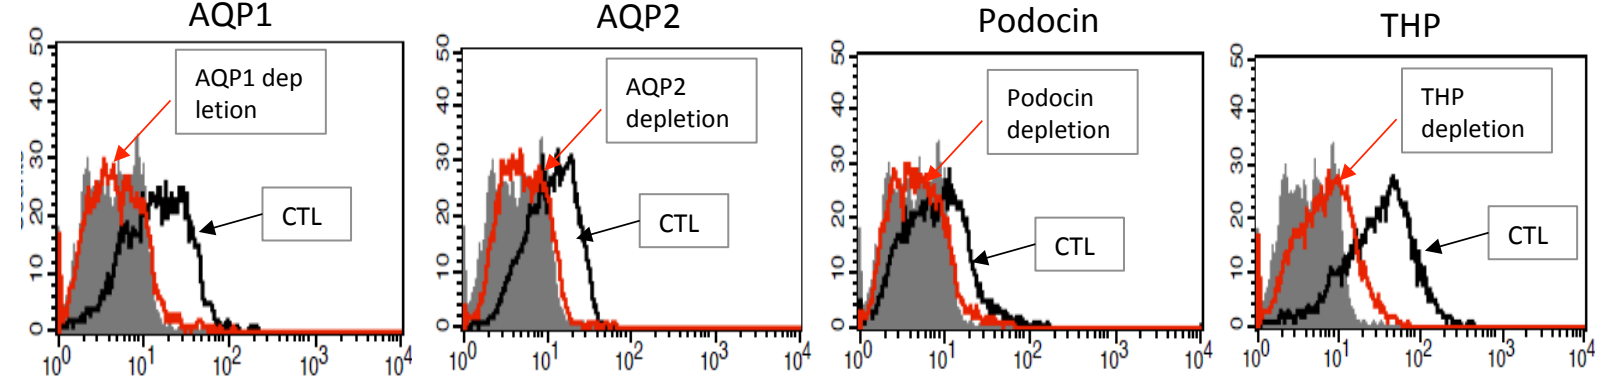



Human primary cells

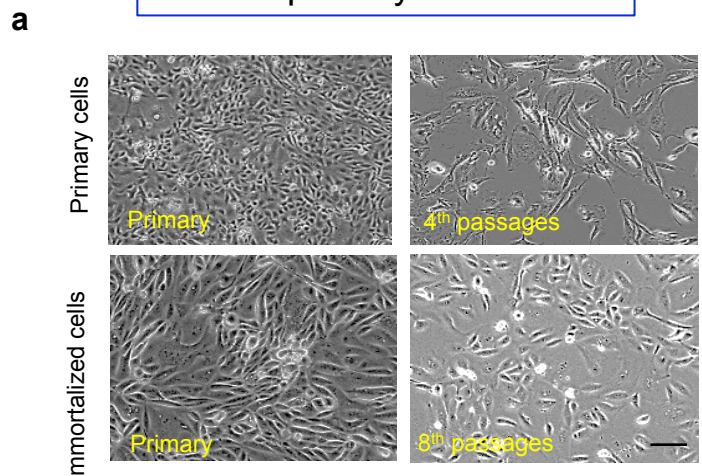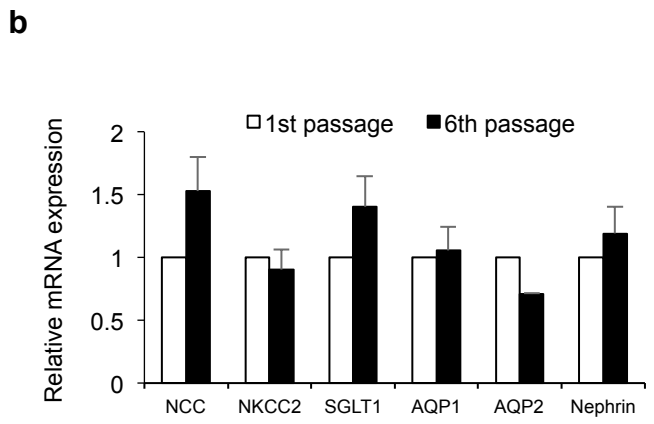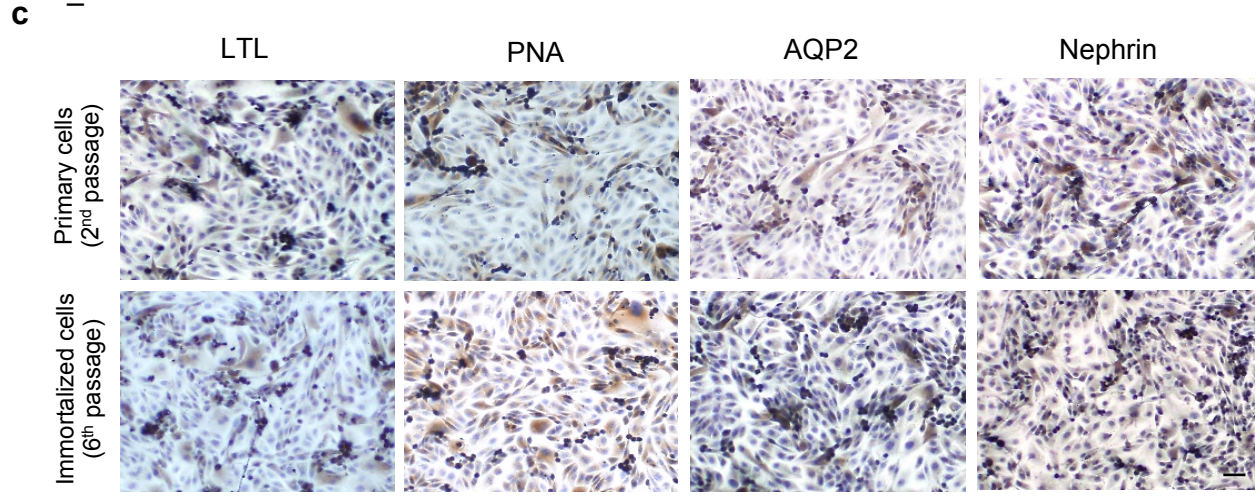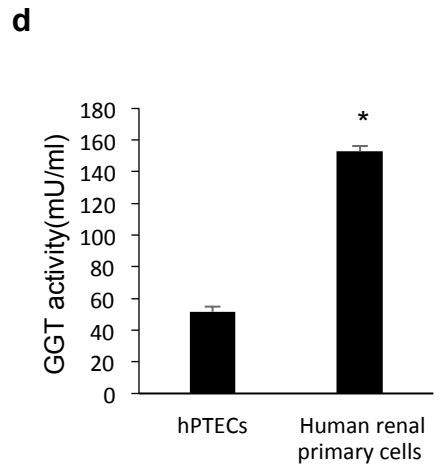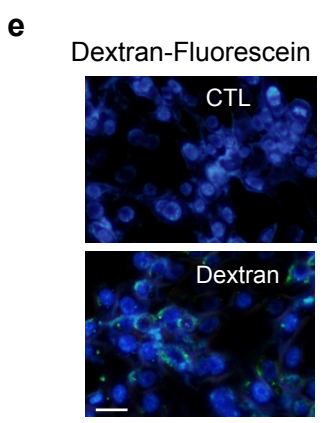

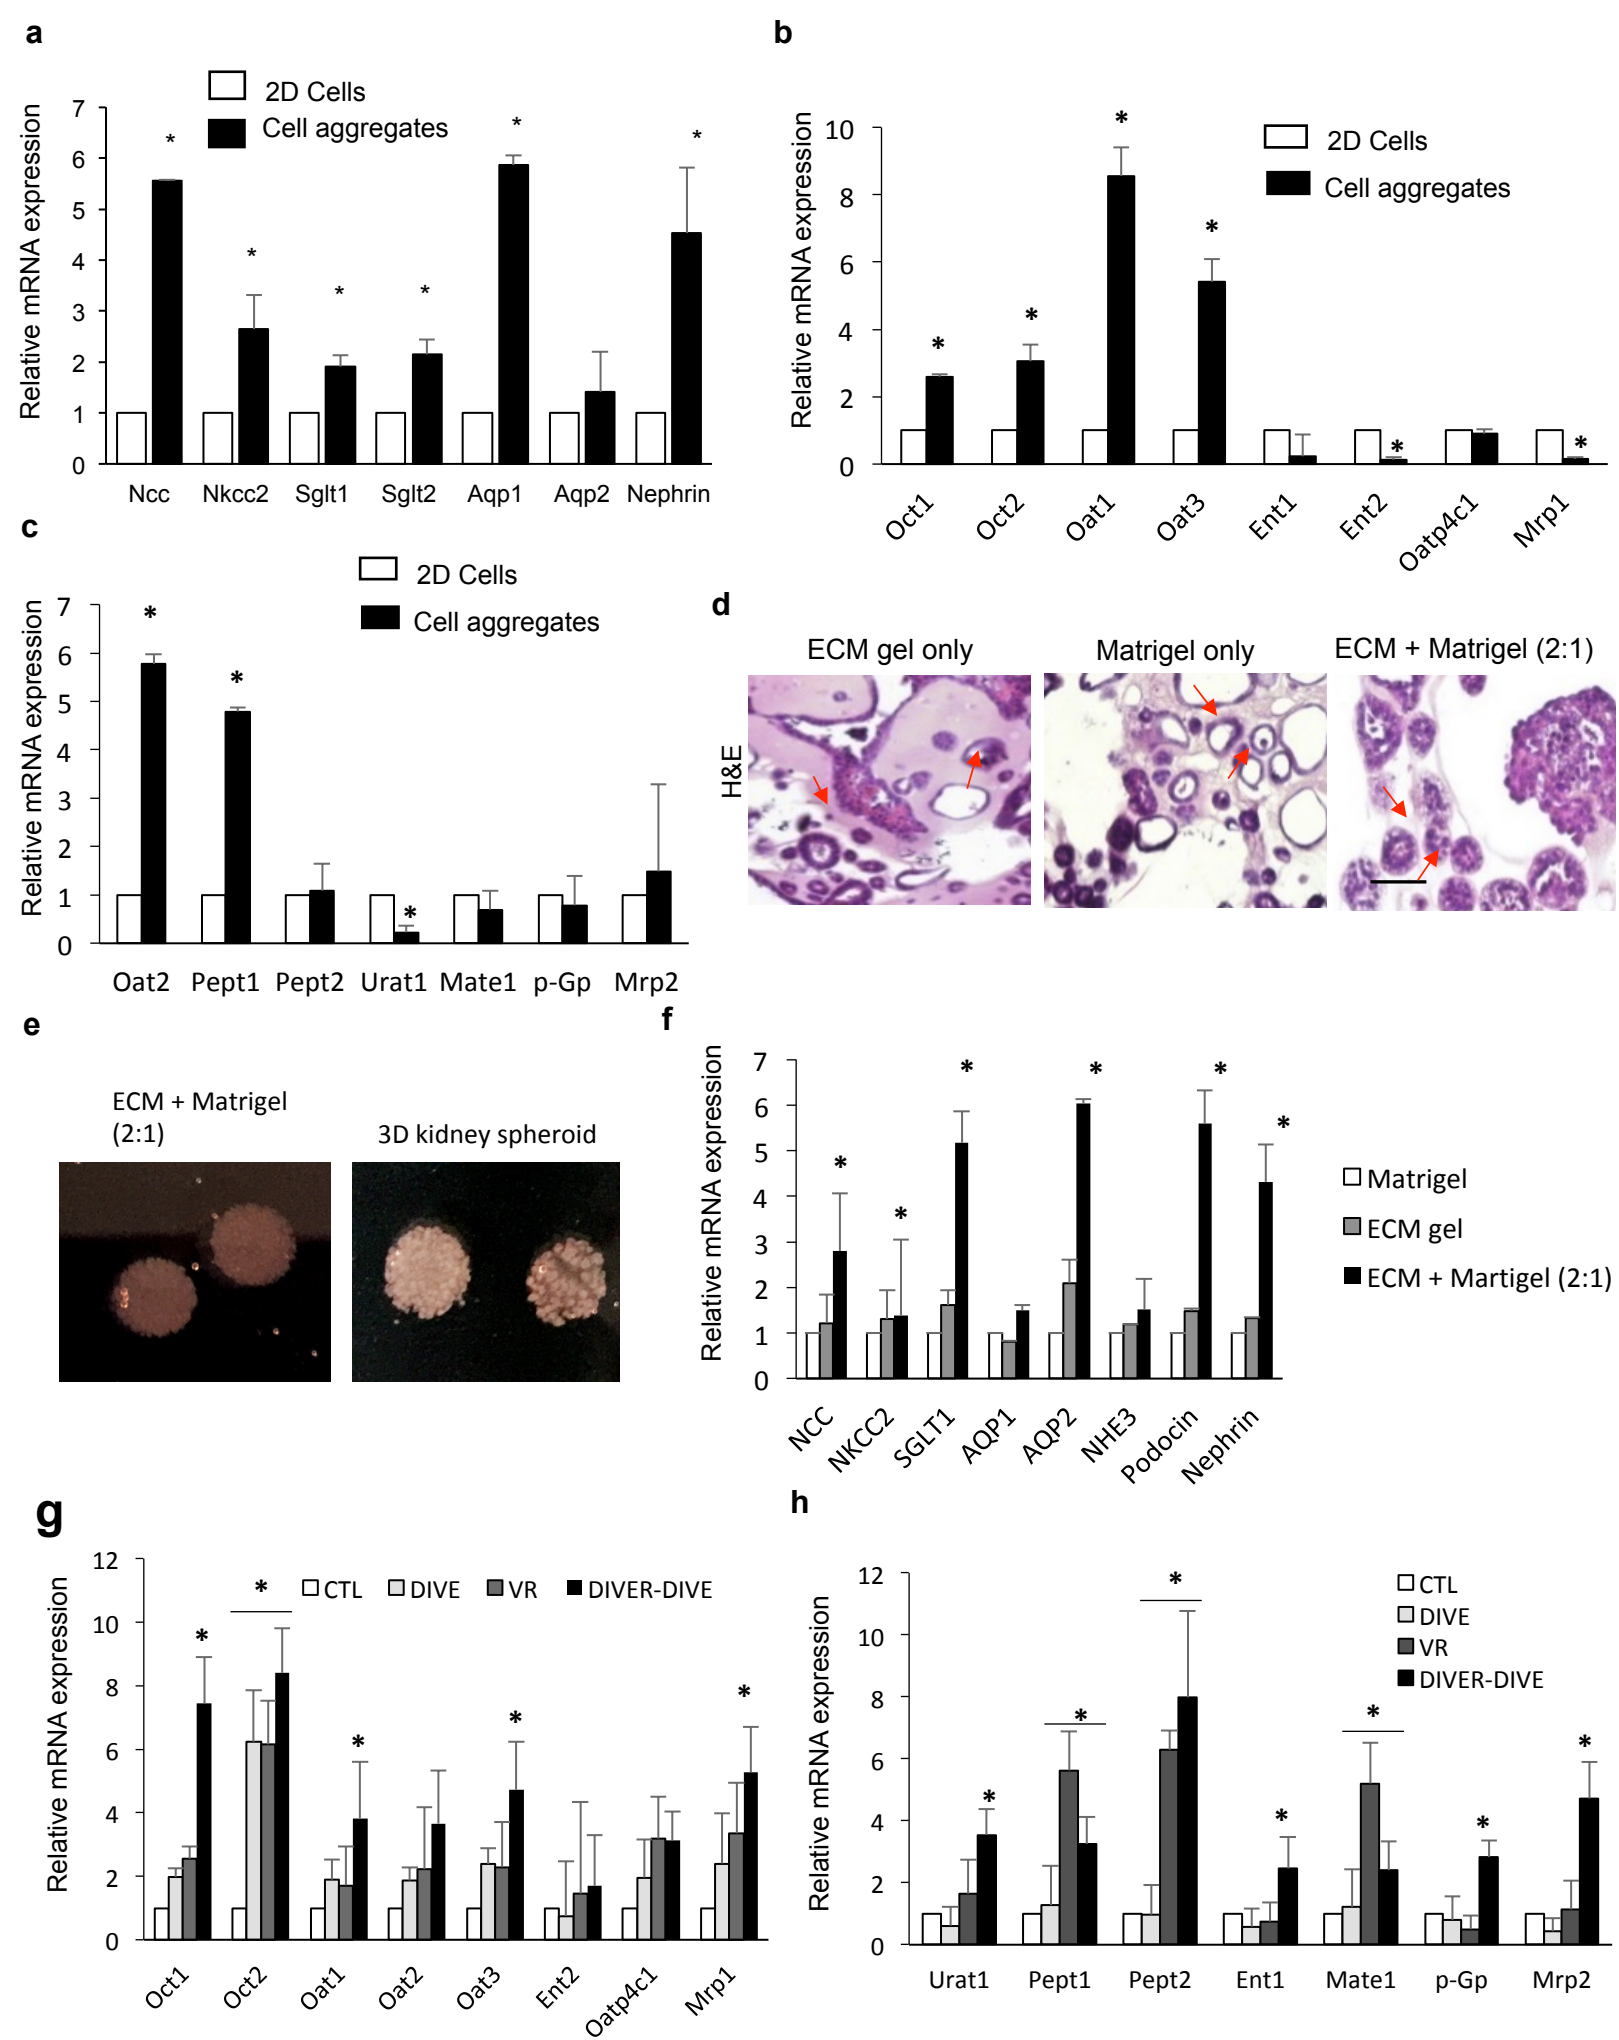

**a**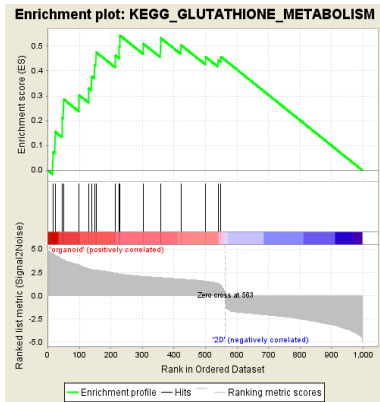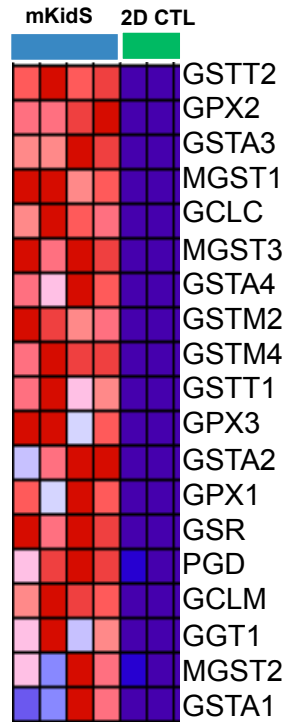**b**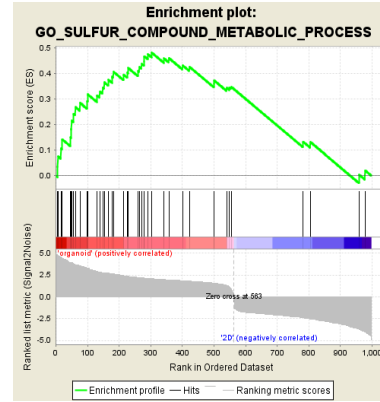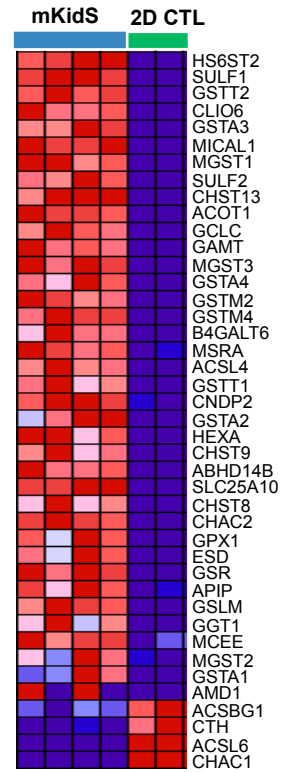**c**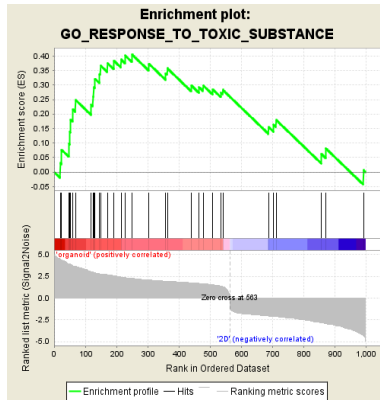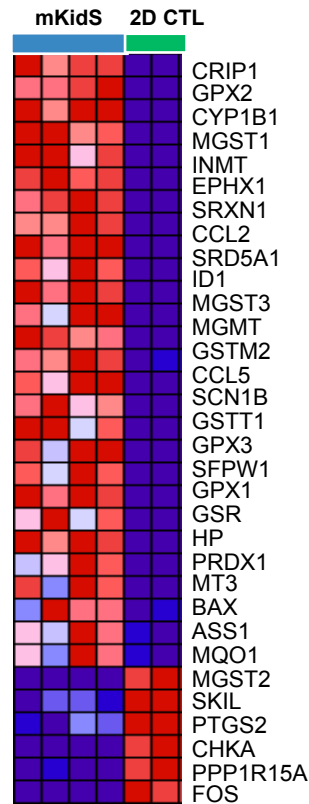



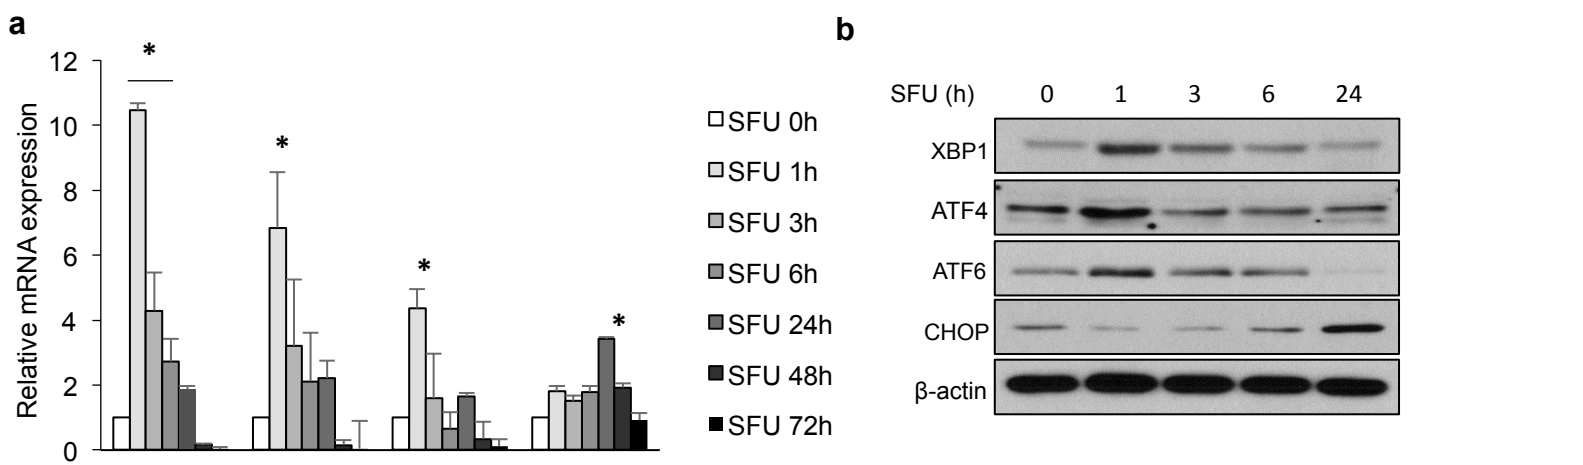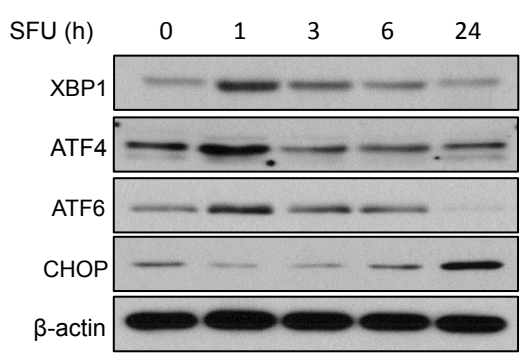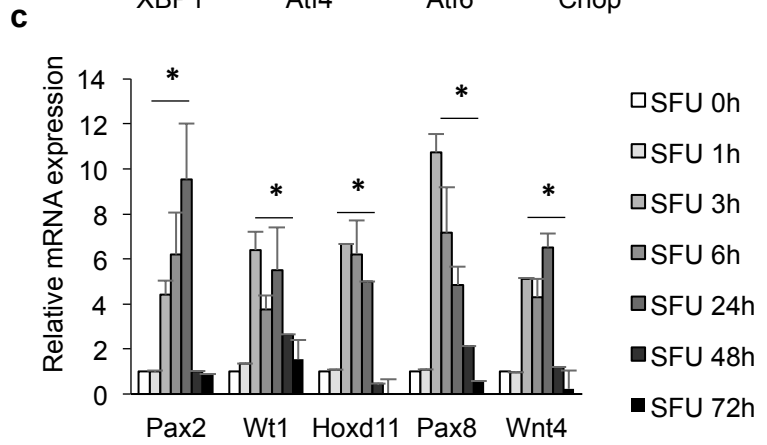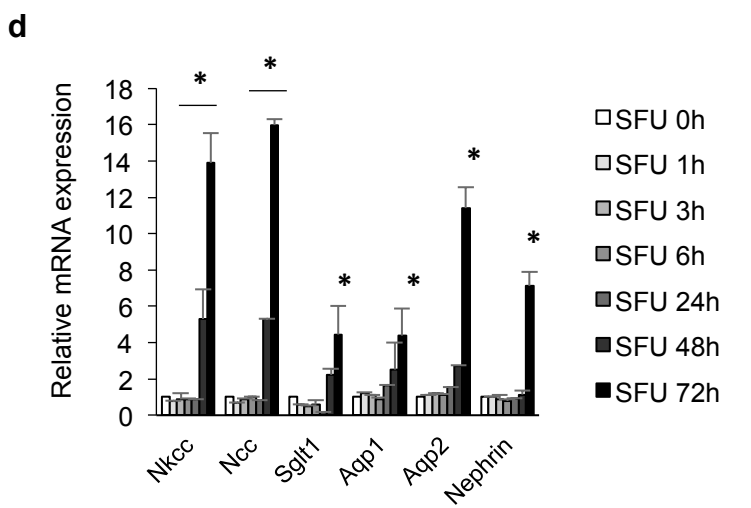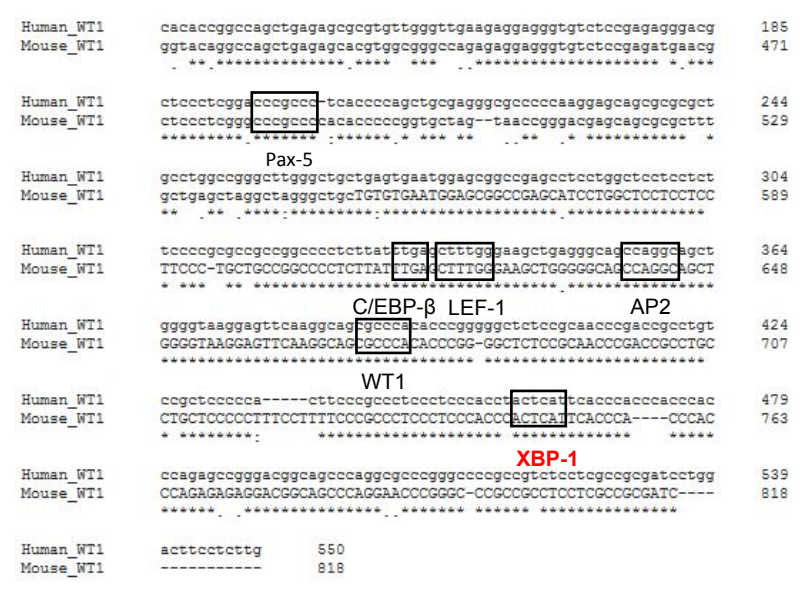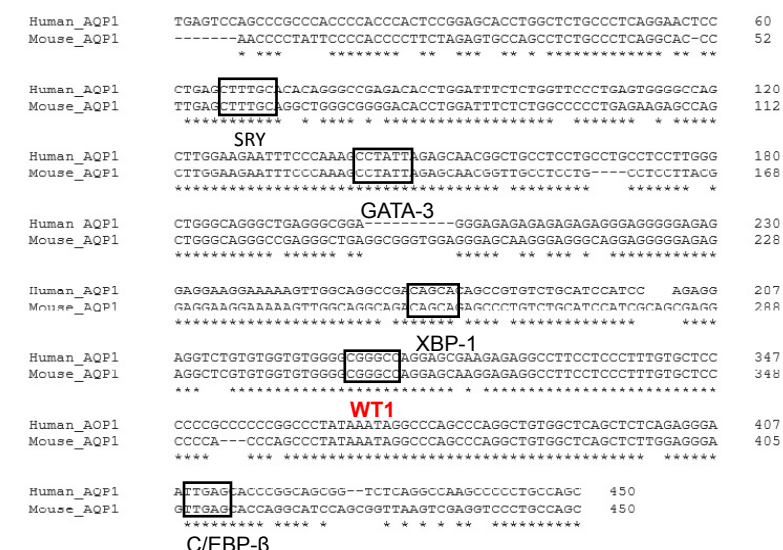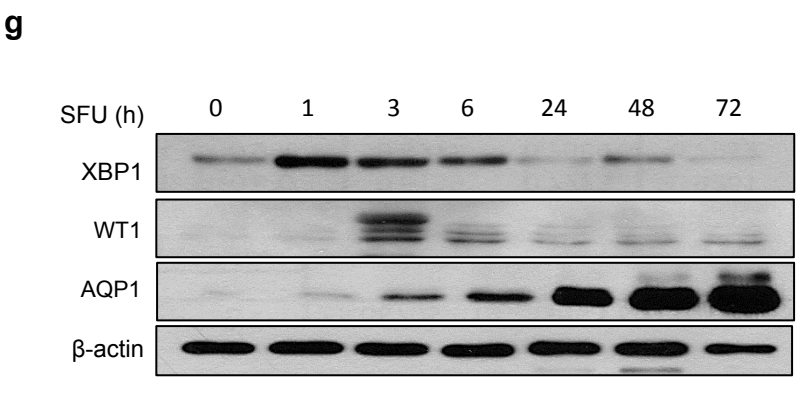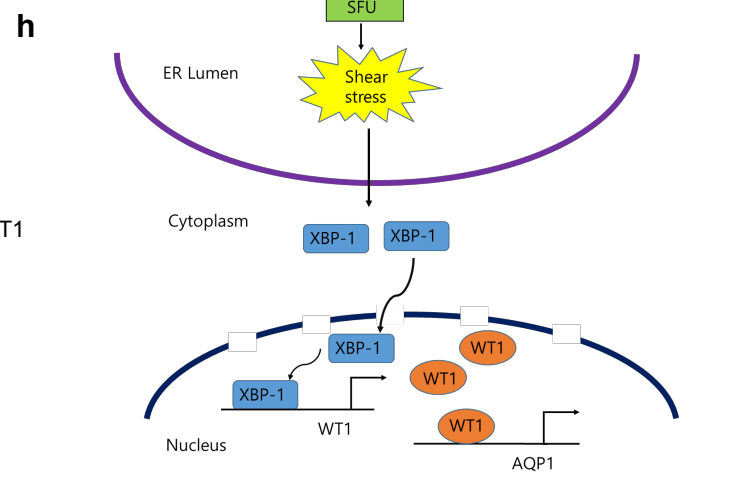

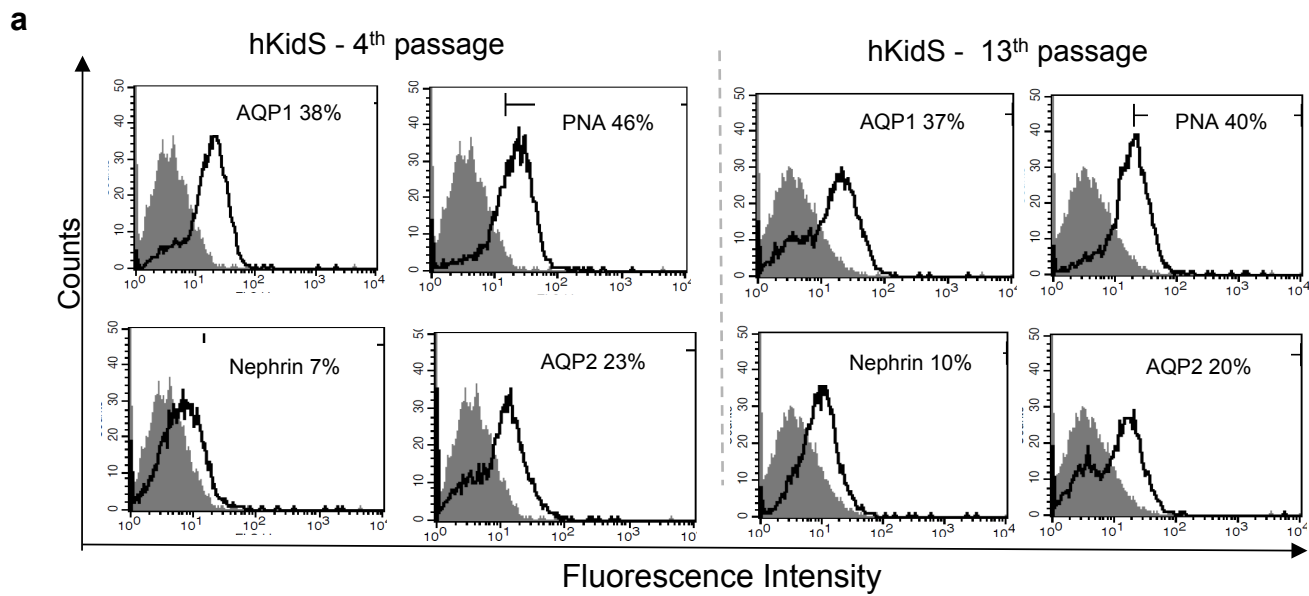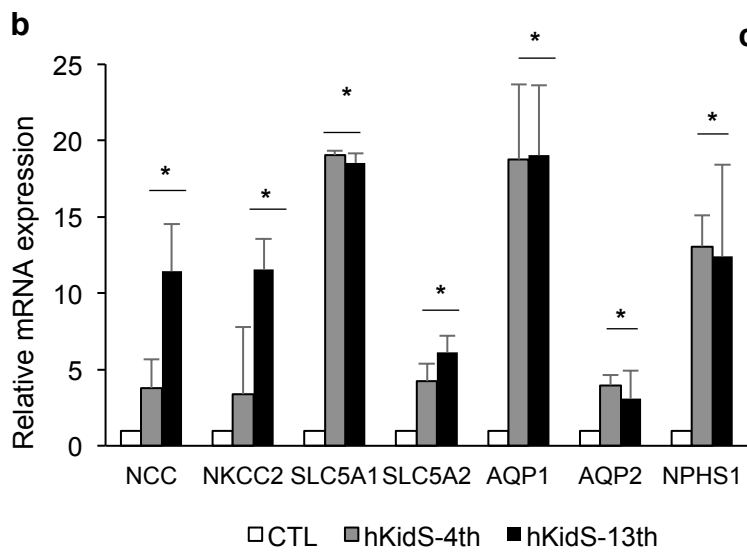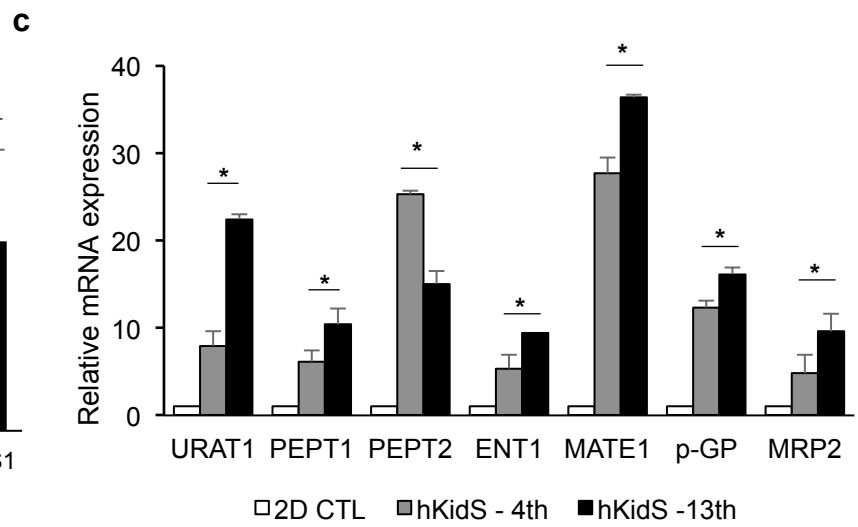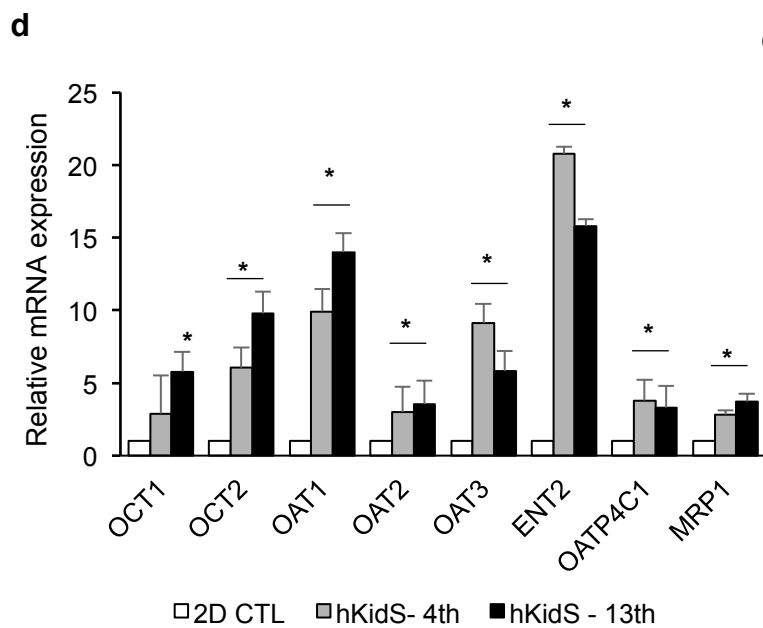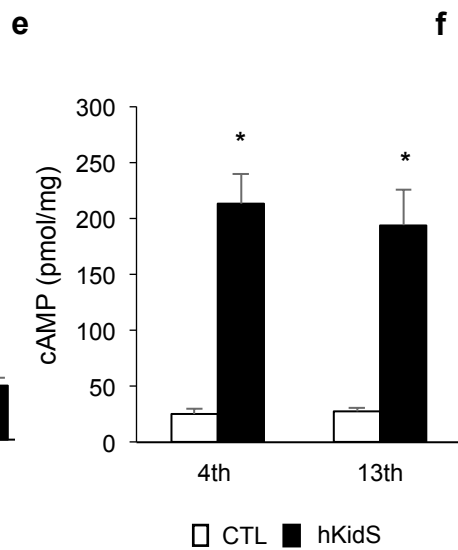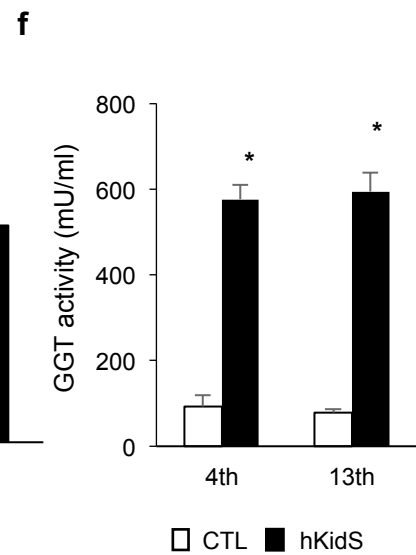

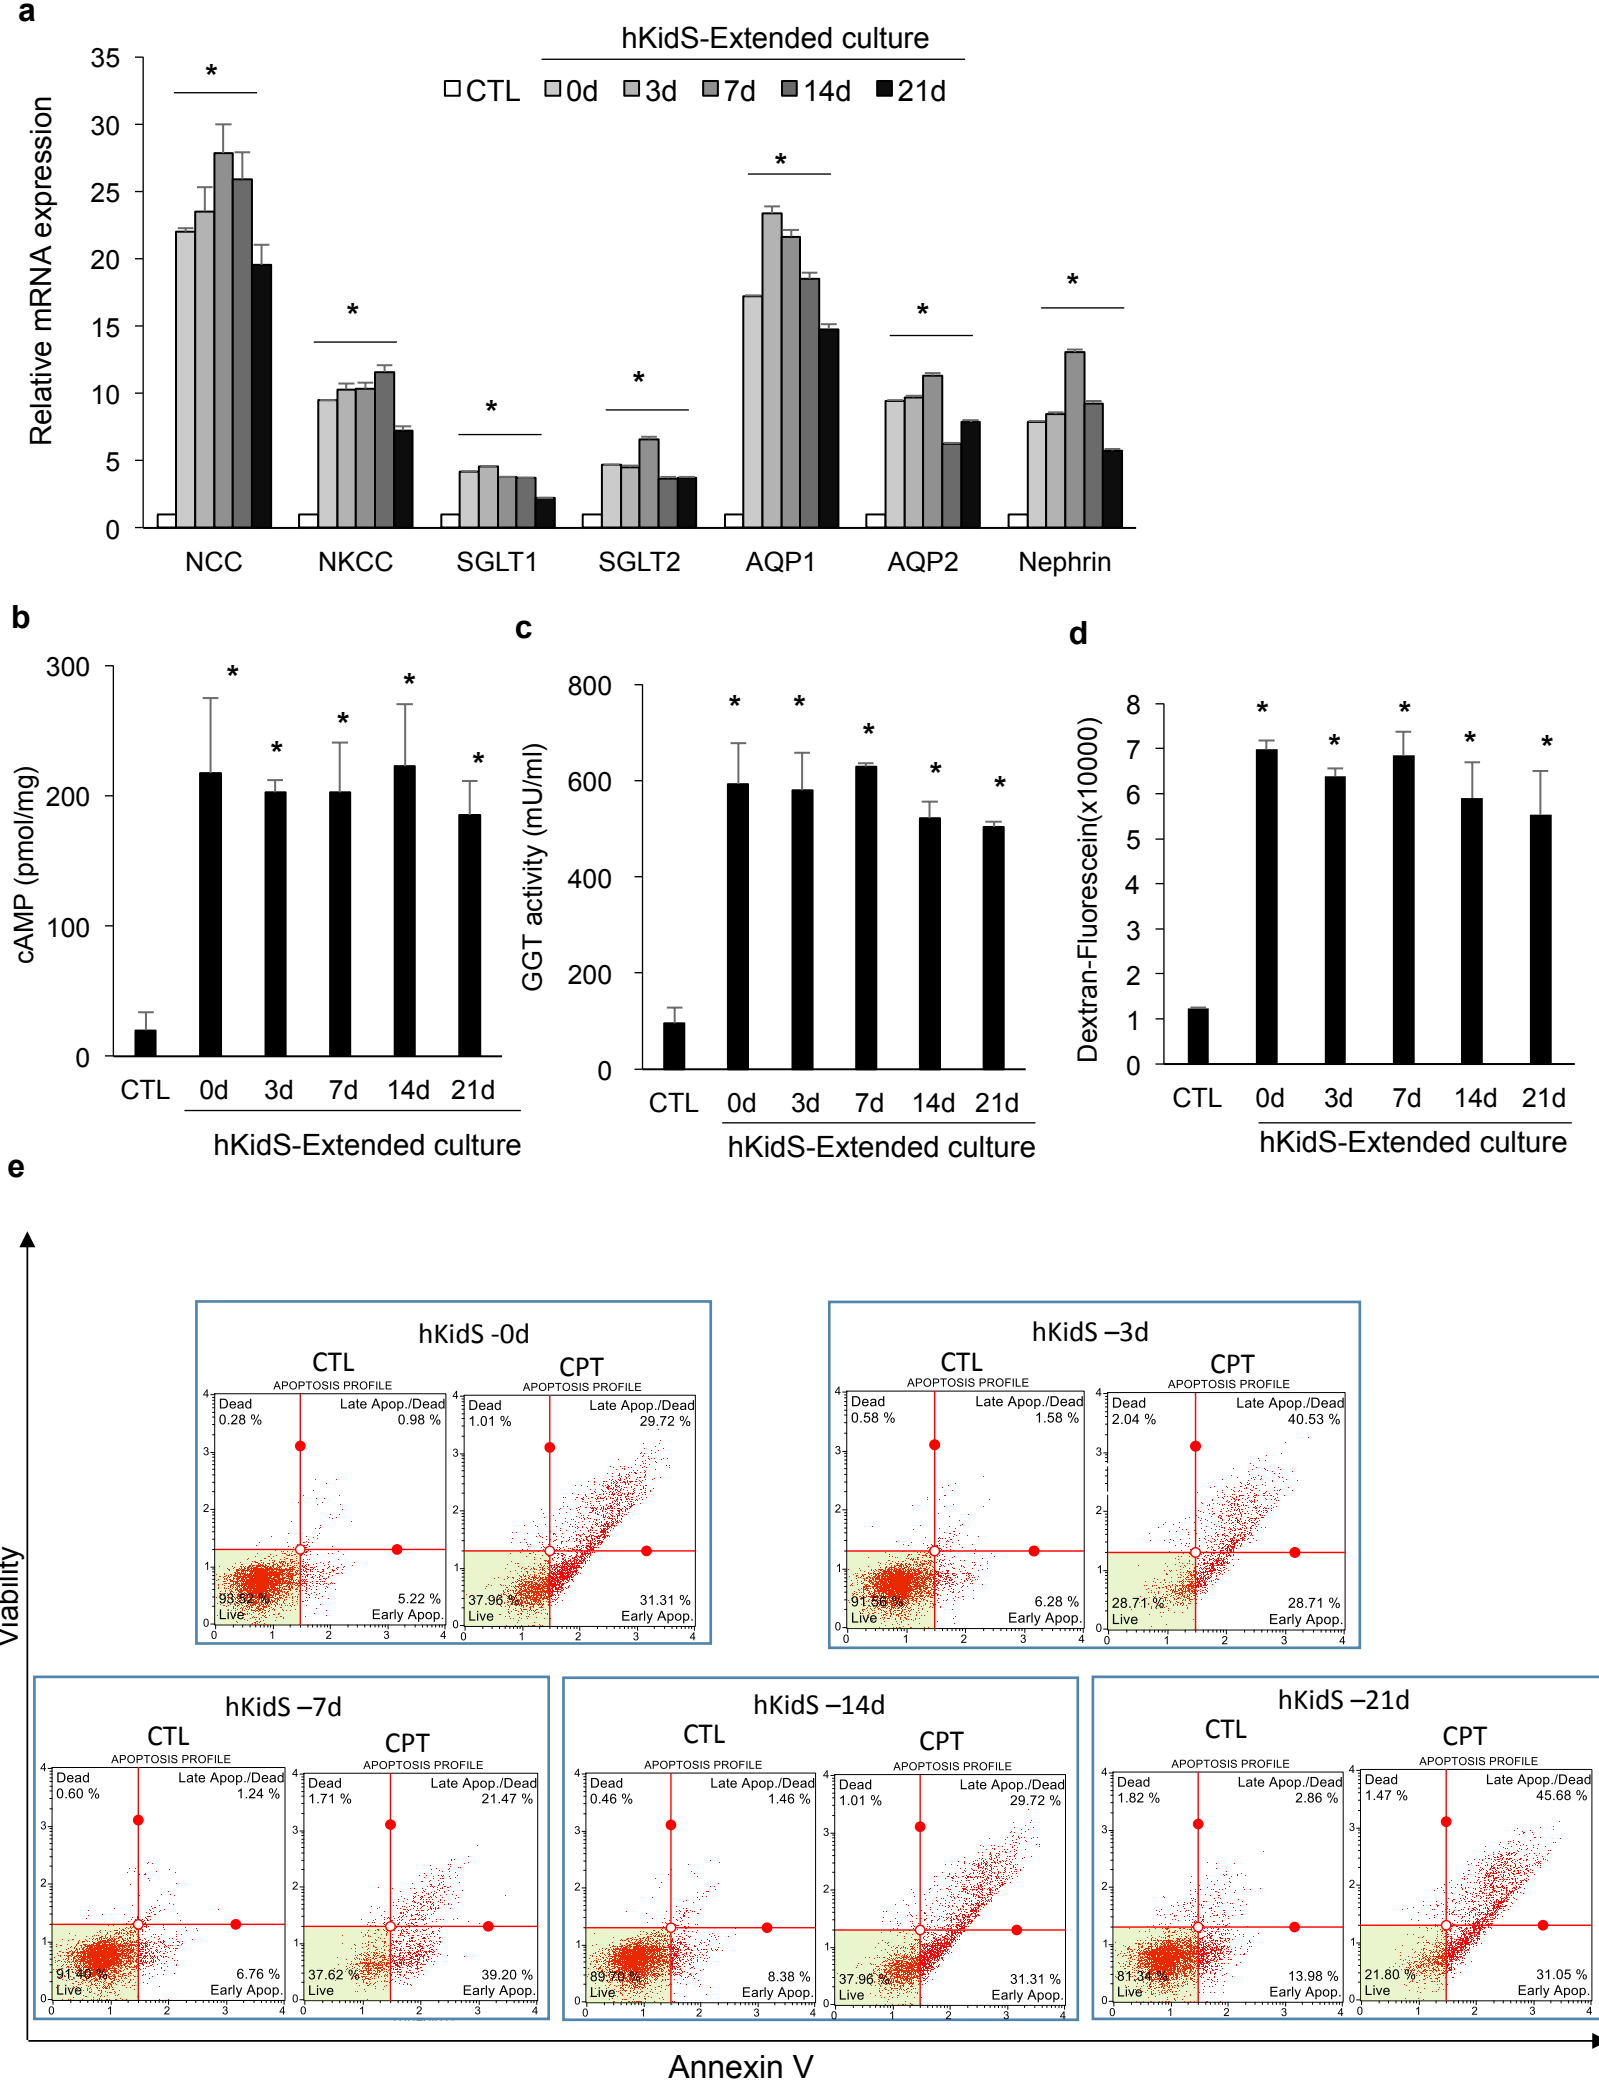

**a**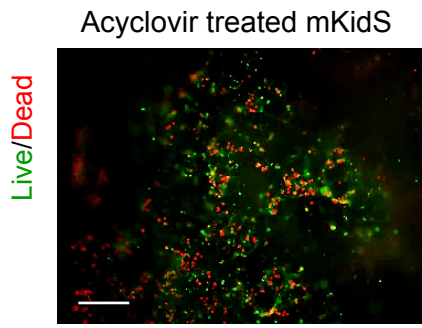**b**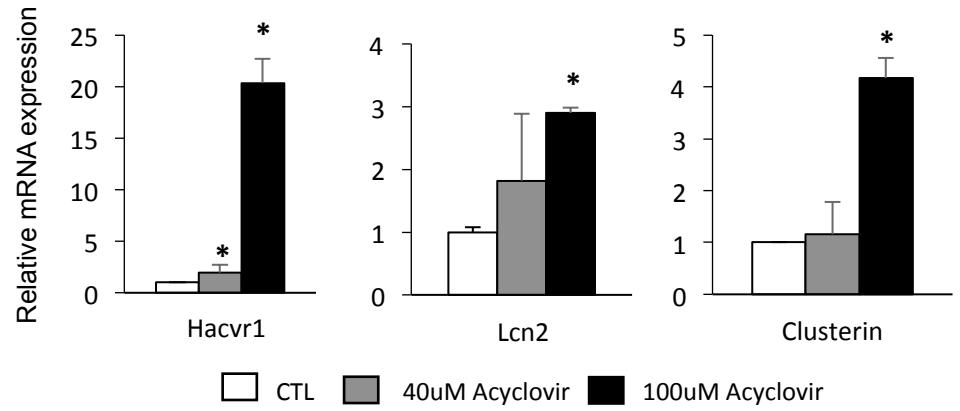**c**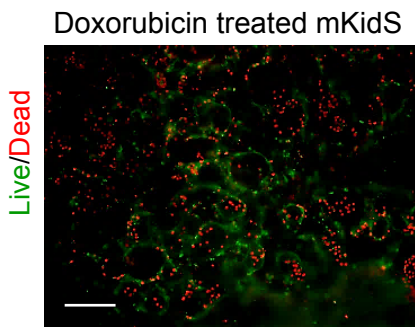**d**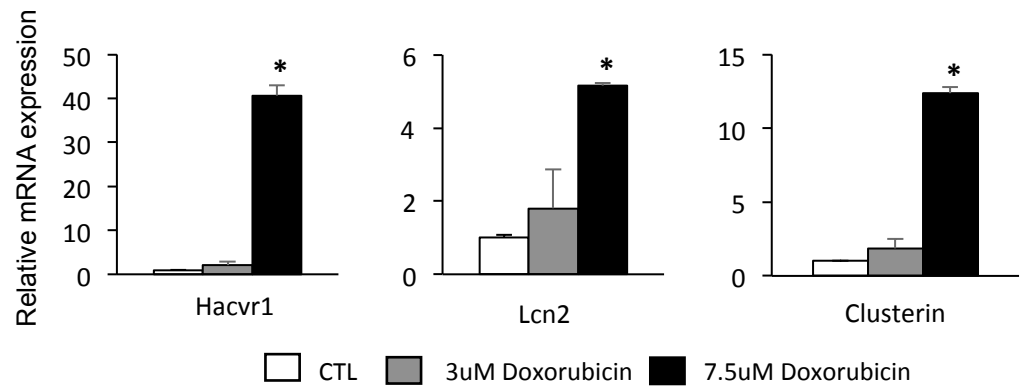

Cyclosporin A- treated spheroid

Apoptosis profile  
- CTL

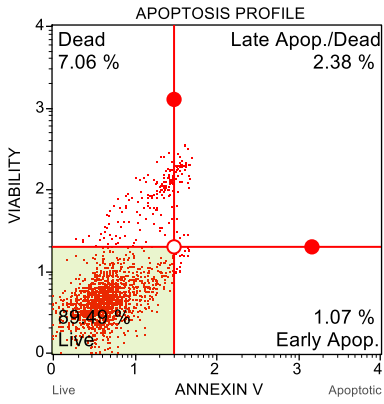

Apoptosis profile  
- Spheroid 1

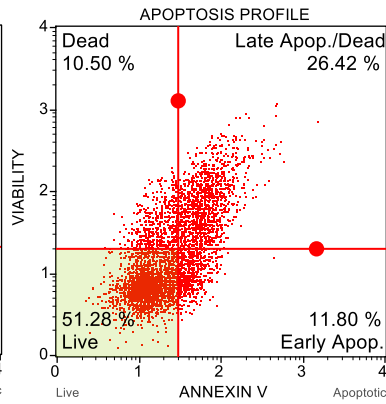

Apoptosis profile  
- Spheroid 2

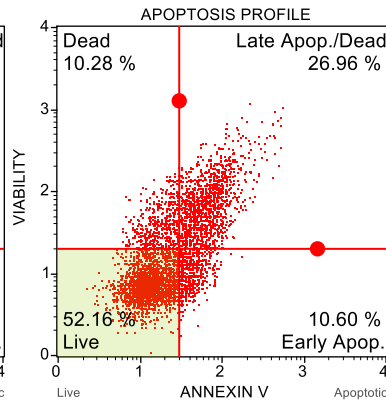

Apoptosis profile  
- Spheroid 3

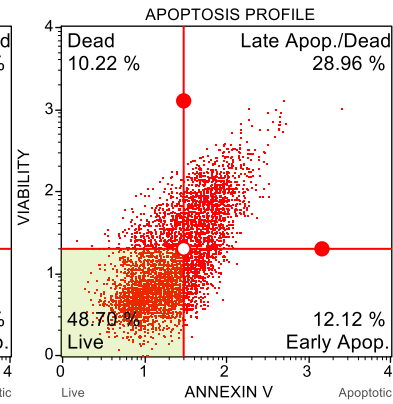

Cisplatin-treated spheroid

Apoptosis profile

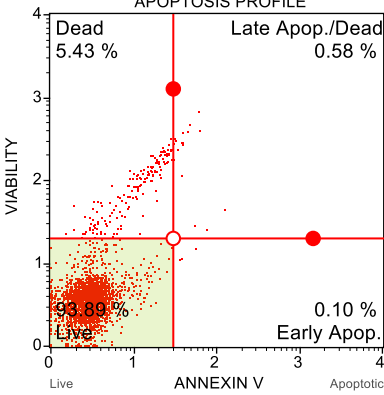

Apoptosis profile

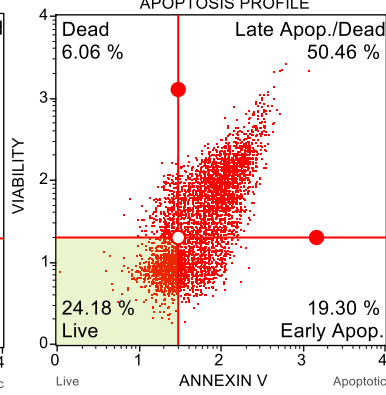

Apoptosis profile

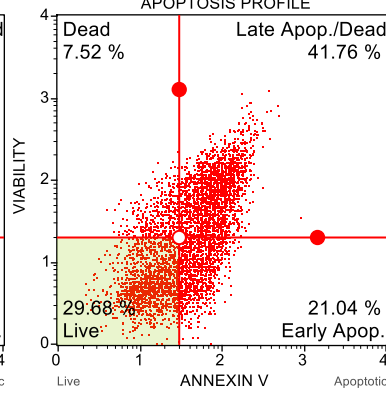

Apoptosis profile

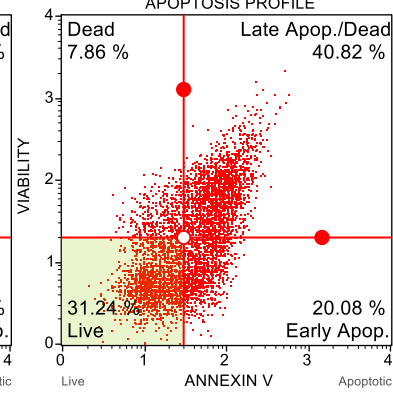



Fig. 1j

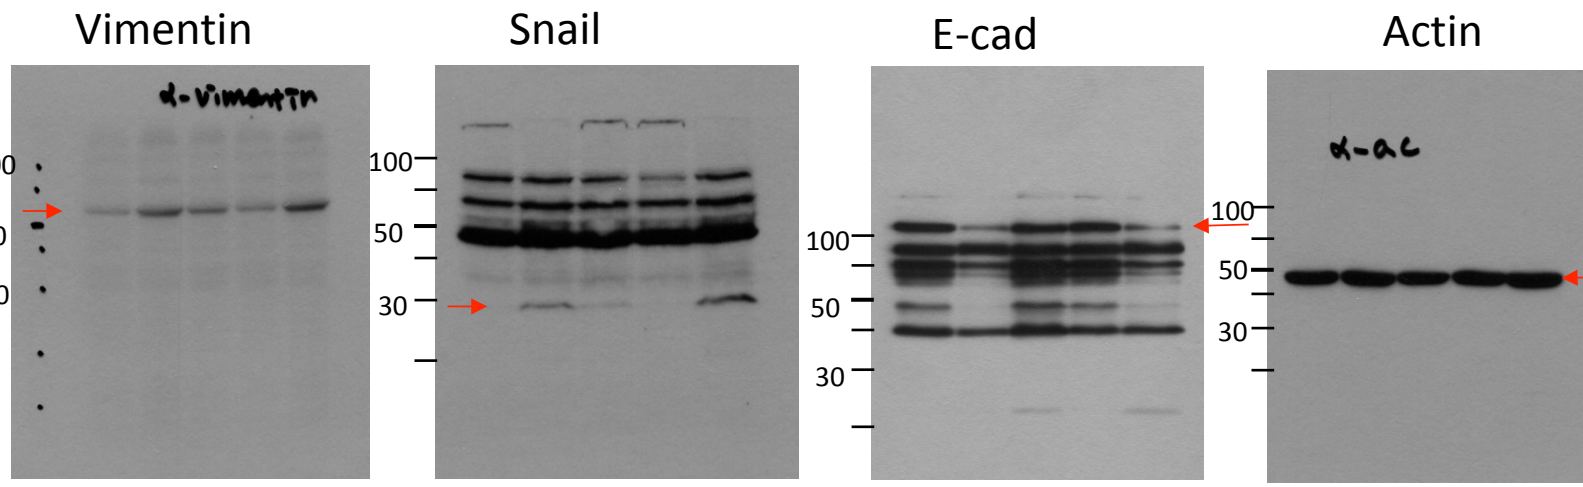

Fig. 2c

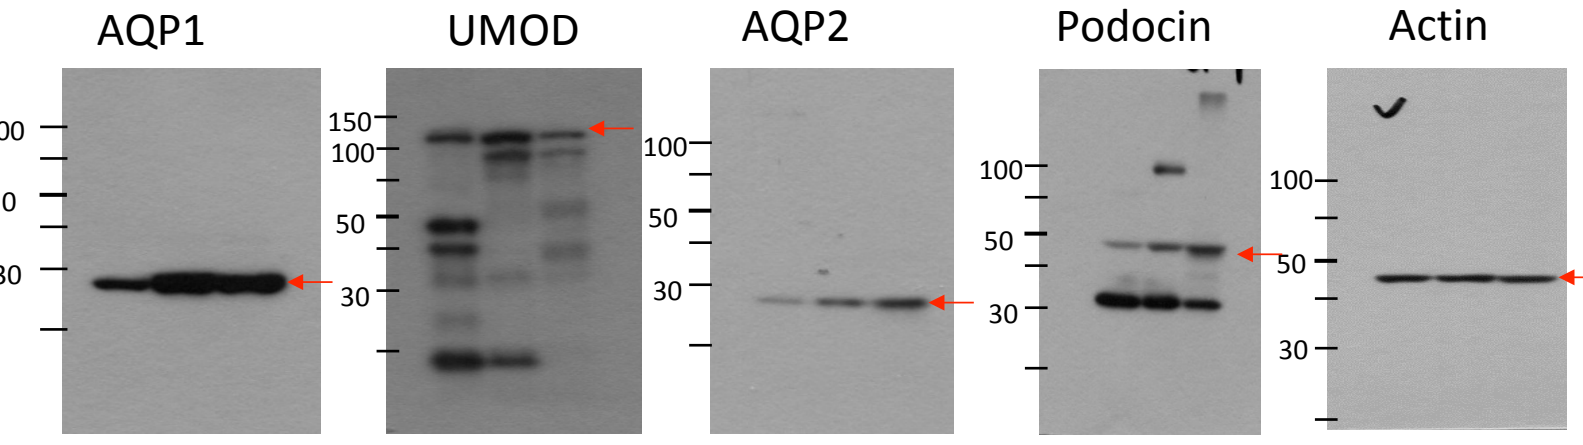

Fig. 3b

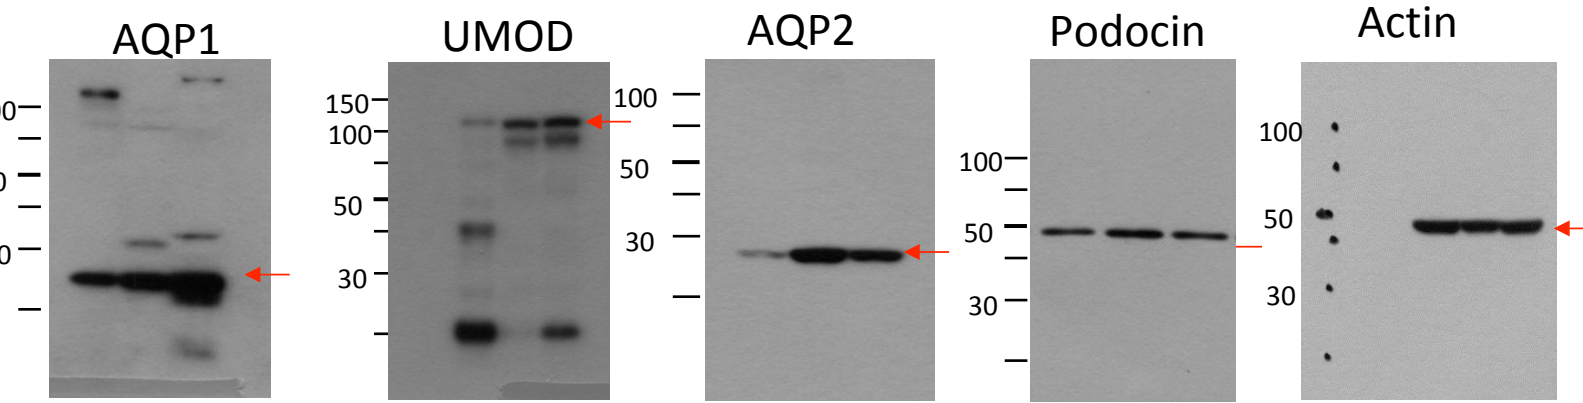

Fig. 5c

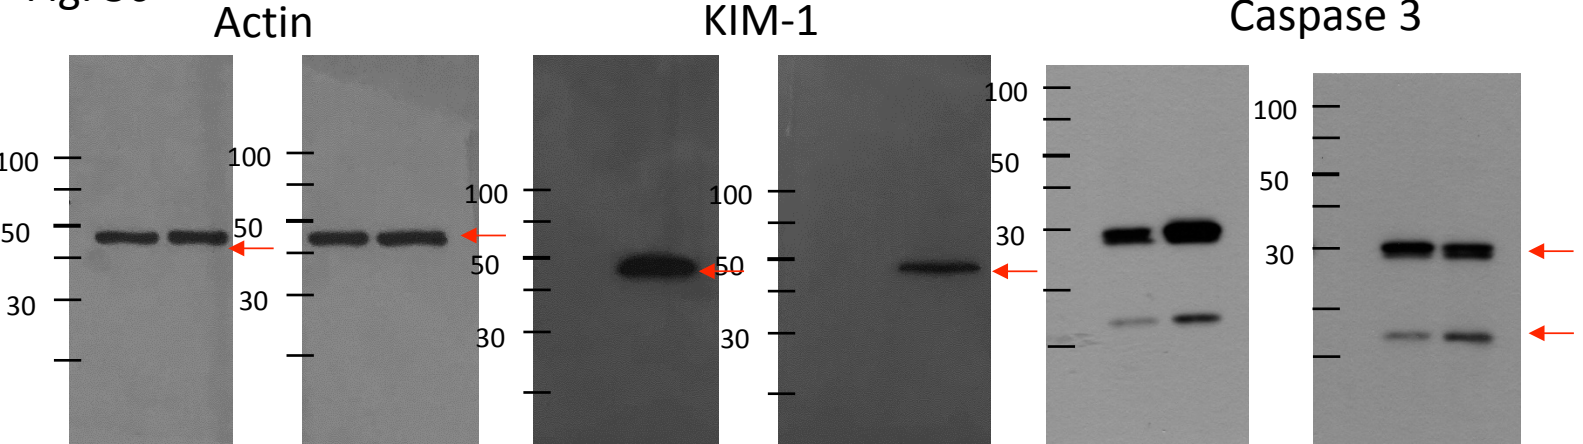

Fig. 7c

Actin

KIM-1

Caspase 3

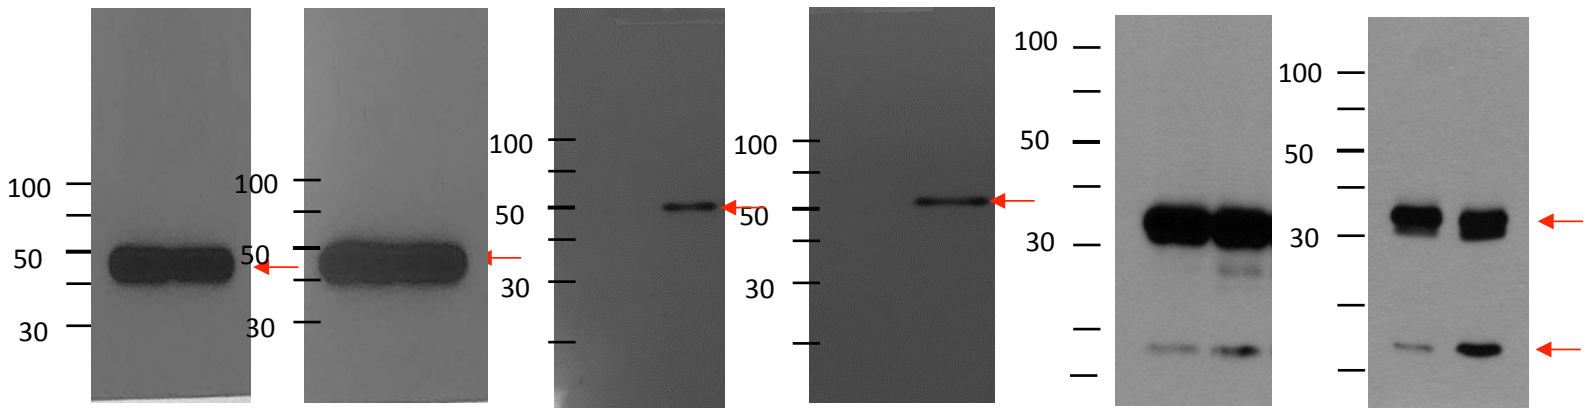

Supplemental Fig. 7b

XBP-1

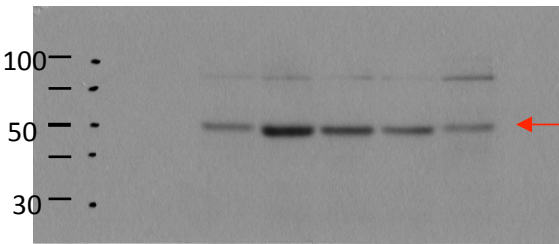

ATF4

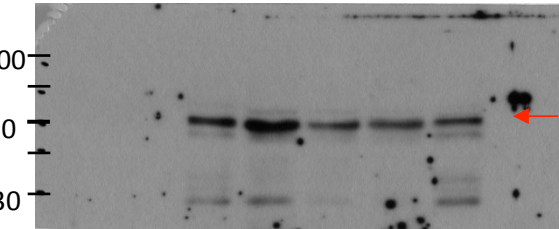

ATF6

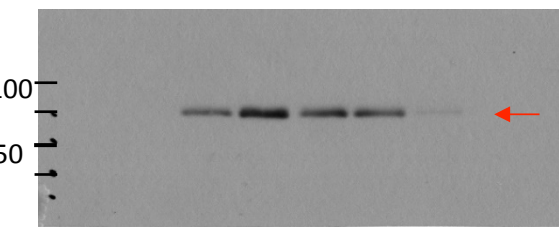

CHOP

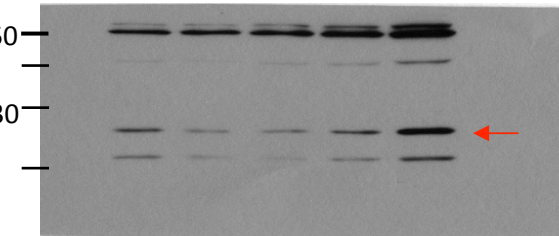

Actin

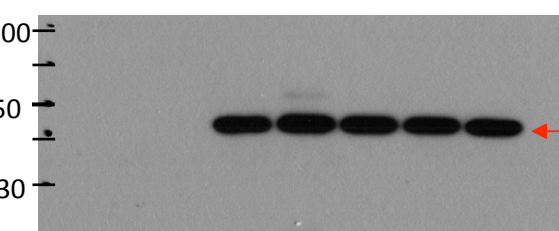

Supplemental Fig. 7g

XBP-1

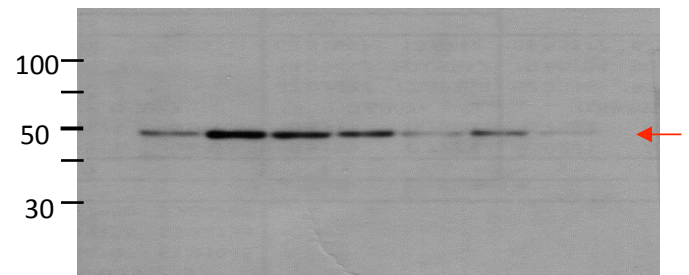

WT1

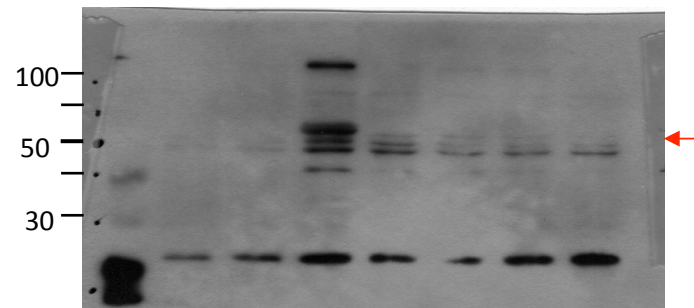

AQP1

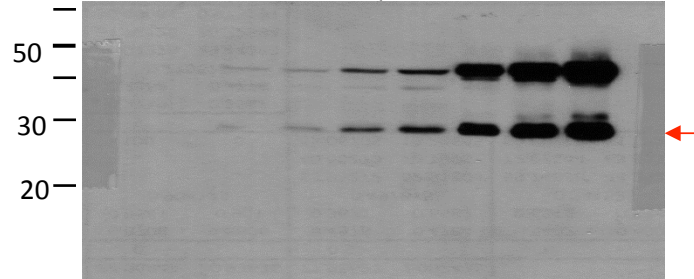

Actin

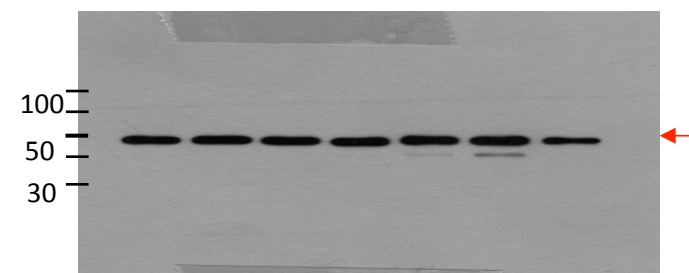

Full-length blots

Supplemental table I. Sequences of oligonucleotide primers used for qPCR

| Gene name  | Forward                | Reverse                 |
|------------|------------------------|-------------------------|
| mNcc       | CCTCAAGCAGGAAGGTAGCC   | TCACTGTTGGTGCCTGTCTC    |
| mNkcc2     | GAGAAGCGGGAATTGGTCTTG  | CTCCACCTCCACGAACAAAC    |
| mAqp1      | GGCCTTTGGTTTGAGCATCG   | CCGGAGGATGCTGATCTGAC    |
| mAqp2      | TTCGAGCTGCCTTCTACGTG   | GGCTGTTGCATTGTTGTGGA    |
| mSglt1     | CTGCAGACATCTTCTCCGGG   | GGCAGTGATTGCTAGCAGGA    |
| mPodocin   | CCGCTGCATTGAGAATGGAC   | CGGCCTTGCCTTCTTGTC      |
| mNephrin   | CGAACTGATGCATGCAAGAAGG | TACTACTAGTGCCTGGTCTCT   |
| mMate 1    | CATGGAACGCACGGAGGAGT   | CATCATCAGCTGGGCCAAGAA   |
| mUrat1     | CGATGTTCTTCTGGCCGTCT   | TGGTCGTAAACCCAGCCATC    |
| mOatp4c1   | AATCAGAATGGGGGTTTCGCA  | GAGACTGGGGGTGAAAGC      |
| mEnt1      | CGGGTTTGAAAGCGCTCG     | GGTGACTGGTTGTCATGGCT    |
| mEnt2      | TCTCAGGCTCCAACTCAGGA   | CCGTCAGCCAGATCTTCCG     |
| mOat1      | CTGATGGCTTCCACAACAC    | GTCCTTGCTTGTCCAGGGG     |
| mOat2      | CAACTGCGGAATCTGGTGCT   | ATCAGGCAGGGCACAATGATG   |
| mOat3      | ATGACCTTCTCCGAGATTCTGG | GTGGTTGGCTATTCCGAGGAT   |
| mOct1      | GACGCCTGGAAAGTGGACC    | GCAACATGGATGTATAGTCTGG  |
| mOct2      | CCAGTGCATGAGGTATGAGGT  | CTGAAACAGGTCCAGCATCCA   |
| mPept1     | CCGGCACACCCTTCTAGTG    | TGGCGTTGTGACTGGTGAC     |
| mPept2     | AAAGCGACAACATTGGCTAGA  | AAATCCCAAATCGCCATCCAT   |
| mp-Gp      | GGACTTTGCAGAGGAAACCG   | TGTCCAGCCAACCTGCATAA    |
| mMrp2      | CTGGAAATCACGATGGACGA   | GAAAGCCCAAGGGAATCCACA   |
| mMrp1      | GCACCTATGCCAACGCTGAG   | AGACGAGTTGCTGAGATGCC    |
| mHavcr1    | GCTGCTACTGCTCCTTGTGA   | TCTTCAGCTCGGGAATGCAC    |
| mLcn2      | GCTGTCGCTACTGGATCAGA   | TGGCGAACTGGTTGTAGTCC    |
| mClusterin | CCCAAAGGGGGTGTACTTGA   | GAATCTTCATGGCGTGGCCT    |
| mCd133     | CCCGGAGGAGAGCTGGACCG   | AGGGCAATCTTCAGAGCCAGACT |

|         |                         |                         |
|---------|-------------------------|-------------------------|
| mSox9   | GTGCAAGCTGGCAAAGTTGA    | TGCTCAGTTCACCGATGTCC    |
| mFoxd1  | CCCCTCCTGGACTAACCGGGC   | CGAGGTGTTTGCCTCCCCG     |
| mLgr4   | CCGCTGCCTGCTTGCCTGAA    | TCCTGGTGACACGCCGCTTC    |
| mPax2   | GCGAGCCGACACCTTCAC      | GACGCTCAAAGACTCGATCCA   |
| mPax8   | CAGAAGGCGTTTGTGACAATGA  | TGCACTTTGGTCCGGATGAT    |
| mLgr5   | CACAGCCACTGCGGCGACTT    | CAATGGGCGTCTGCCGGGTC    |
| mSix2   | GGACGGATCGTTGTGACTCAGGA | TCGCTGTTCTCCCTTTCCTGGC  |
| mBmi    | CTCCAAGATGGCCGCTTGGCT   | TTGGAGCCATTGGCAGCATCAGC |
| mWt1    | CTCATGAACCTTCACAACAACGA | TGGCGCATCTCAGAGAACAC    |
| mScf    | AAGCAACGGCCAAGGACGGG    | GCGGTGTGGCGACTCCGTTT    |
| mc-kit  | GCCAAGGGCATGGCGTTCCT    | TCCGCCCGTGAGTGAGGAGG    |
| mCd90   | AGTCTCGGGCGCGAATCCCA    | TGCCGCCACACTTGACCAGC    |
| mCd105  | CTCAGGGCCCGTCCACACCA    | AGGGGCGTGGGTGAAGGTCA    |
| mCnd1   | TCAAGTGTGACCCGGACTGC    | CCTTGGGGTCGACGTTCTG     |
| mCnd2   | TAAGGGAAGCACTCCCCGA     | CACTCGGTCCCGACTGTAA     |
| mCne1   | GTTCCAAGCCCAAGTCCTGA    | CTGGAGCGGACTGAAAGGTC    |
| mctnb1  | GCCGCGCCGCTTATAAATC     | CTTACAGGACACGAGCTGA     |
| mc-myc  | GTTGGAAACCCCGCAGACAG    | ATAGGGCTGTACGGAGTCGT    |
| mOct4   | GGCTTCAGACTTCGCCTTCT    | TGGAAGCTTAGCCAGGTTCCG   |
| mSox2   | CAGTAGACTGCACATGGCCC    | CTTCTCCAGTTCGCAGTCCA    |
| mRB1    | AGCCCAGAGAGGATTGGGTA    | GGTGGTGTCTCATACGCACA    |
| mNanog  | AAGGATGAAGTGCAAGCGGT    | GGTGCTGAGCCCTTCTGAAT    |
| mPCNA   | TACAGCTTACTCTGCGCTCC    | TTGGACATGCTGGTGAGGTT    |
| mVim    | GATCGATGTGGACGTTTCCAA   | ATACTGCTGGCGCACATCAC    |
| mFn     | ACAAGGTTTCGGGAAGAGGTT   | CCGTGTAAGGGTCAAAGCAT    |
| mHoxd11 | ATGCGCTGTTGTTCTCTCC     | CTAGCCCCATGGCCTAACTT    |
| mEya1   | GAATGCAACAAGCCACAGCC    | CCGTCTTGATGCCATAGGAG    |
| mLhx1   | CAACCTGACCGAGAAGTGCT    | CGAACCAGATCGCTTGGAGA    |
| mXBP1   | AACACGCTTGGGAATGGACA    | ACATAGTCTGAGTGCTGCGG    |

|              |                         |                          |
|--------------|-------------------------|--------------------------|
| mATF4        | TGGGGCCTTTAGGACGATCT    | GTGGTCACGTGATCCTACCG     |
| mATF6        | TGGTTAGTAATGGGAATGGAAGC | CTTGGTCCATCGTGGGAGG      |
| mChop        | CAGAGCCAGAATAACAGCCG    | TGGACCAGGTTCTGCTTTCA     |
| mGapdh       | TAACATCAAATGGGGTGAGG    | GGTTCACACCATCACAAAC      |
| hNCC         | CTTCTGCATGCGCACCTTTG    | GTGTCTGCCTTCTGCTTGA      |
| hNKCC        | CTGCGATAGCAACTAACGGGT   | ACATAGCAACAGCCACTGCAT    |
| hSGLT1       | CCCATTTCGAGGACAGCTCTTA  | GGGAGCAGGGCAGTAGCG       |
| hAQP1        | TACGACTTCATCCTGGCCCC    | ATTTGGGCTTCATCTCCACCC    |
| hAQP2        | CTCCCCTAGACATGGCCTCT    | ATACACACACGTGAAGGCGT     |
| hPodocin     | AAGAAGTCAAAGGCCGGGAG    | TCCACATTCCTACCGTGGC      |
| hNephrin     | GTGCAATGGGCCAAAGATGG    | GCACTCATACTCCGCGTCAT     |
| hMRP1        | CCCGCTCTGGGACTGGAA      | TCGGTCATGTCGGGAGAGAT     |
| hMRP2        | GGGAACTGGTGAGTCTCCCT    | CCATTCTGATGTTCTCCGTAAAGG |
| hSLC22A1     | CCCCTCATTTTGTGGCGGT     | AAGGTTCTCGGCGTCTTC       |
| hSLC22A2     | TGCAGCTGGAGTTCTCATGG    | CTCCGATATCTCCGCCAAC      |
| hSLC15A1     | GAGCGGCTCATCTCCCAAAT    | CCCGGACATAGTTGTTGCCT     |
| hSLC15A2     | TGATCAAGTCCTTGGGTGCC    | CACCAAAGCTGCCACACAG      |
| hSLC29A1     | CAGCCCGGAGAAGGGACG      | TTTTAGGCCCGGGAGCCA       |
| hSLC22A6     | AGTATGGAGGTACTCCGGGC    | GCATGGAGAGGCAGAGGAAG     |
| hSLC22A7     | CACCACGTTGGGGGAAGAAA    | ACCAGATCCCACTCAGTTGC     |
| hSLC22A8     | GGACACCAGAGTCCATACGC    | CCTTTCTCCCTCTTCTTGCCA    |
| hSLC22A12    | GAACACGGGCACTCTCCTGA    | CAGTCCCGCACACCGTAGG      |
| hSLC29A2     | TTCTCCAGCGTCCCCGATA     | CCGGGAGTGCTCTCATAATCT    |
| hSLCO4C1     | GGTTGGTCCTTGAGGCGAC     | CCGCCTGAACCTTCCTACTC     |
| hP-gp        | GAGAGCGGAGGACAAGAAGG    | AATGTTCTGGCTTCCGTTGC     |
| hHAVCR1      | GCTCTGAAGCCGTTATATGTGG  | GGTTGGTACCCTCCACCAGA     |
| hLCN2-F      | CACCCTCTACGGGAGAACCA    | ACACTGGTTCGATTGGGACAG    |
| hClusterin-F | CACTCGACTCTGCTGCTCAT    | CAAATGAAGGCATGCCGGG      |
| hTUBB        | GTGGTACGGAAGGAGGTTCGAT  | GGCGGAACATGGCAGTGAAC     |

---

Supplemental Table II. The list of differentially expressed genes when 2D cells and mouse kidney spheroids (mKidS) were compared.

| tracking_id   | 2D cells-1 | 2D cells-1 | mKidS-1   | mKidS-2   | mKidS-3  | mKidS-4  | mkidney-1 | mkidney-2 |
|---------------|------------|------------|-----------|-----------|----------|----------|-----------|-----------|
| 0610040J01Rik | 0.455924   | 0.451682   | 12.2687   | 18.9776   | 8.03338  | 12.0805  | 33.2355   | 42.6219   |
| 1110008P14Rik | 31.8528    | 28.3732    | 108.661   | 70.8353   | 109.519  | 99.4178  | 97.9958   | 91.2505   |
| 1110032A03Rik | 1.72103    | 2.31066    | 4.622     | 5.69935   | 4.70756  | 4.58296  | 44.2251   | 39.6742   |
| 1110054M08Rik | 1.91527    | 1.94416    | 6.2986    | 4.44433   | 4.51838  | 5.42653  | 27.282    | 26.523    |
| 1190007I07Rik | 6.46972    | 7.23491    | 17.4532   | 11.8152   | 19.8546  | 15.7638  | 12.2972   | 13.4246   |
| 1300002E11Rik | 4.32375    | 4.69464    | 15.5261   | 11.3389   | 15.5066  | 12.7375  | 18.3929   | 21.6805   |
| 1600002K03Rik | 5.20493    | 6.51885    | 18.1339   | 14.2029   | 20.058   | 17.3657  | 19.1382   | 7.41541   |
| 1700001F09Rik | 0          | 0          | 0.955719  | 0.856908  | 1.71111  | 0.80774  | 0         | 0         |
| 1700007K13Rik | 0.904437   | 1.09599    | 5.3813    | 2.59328   | 5.13707  | 5.76206  | 2.29335   | 0.703986  |
| 1700009P17Rik | 0.567888   | 0.802369   | 3.93599   | 3.22047   | 2.70238  | 4.04619  | 15.1499   | 10.8579   |
| 1700010I14Rik | 0.262717   | 0.247258   | 1.45368   | 1.26663   | 1.5399   | 1.50644  | 0.425922  | 1.04747   |
| 1700011H14Rik | 3.8526     | 4.09125    | 43.6534   | 38.798    | 39.1638  | 39.1417  | 356.706   | 311.511   |
| 1700020I14Rik | 5.8683     | 7.17784    | 16.7302   | 15.4849   | 16.7928  | 15.8457  | 15.8707   | 15.0287   |
| 1700037C18Rik | 1.85193    | 2.3256     | 5.23055   | 3.45187   | 5.91066  | 5.93682  | 20.3971   | 17.3515   |
| 1810043G02Rik | 4.46548    | 4.98337    | 13.8818   | 10.1779   | 12.0701  | 12.5599  | 25.5828   | 19.6347   |
| 1810043H04Rik | 18.8214    | 19.0992    | 54.6824   | 29.2369   | 55.6395  | 51.1168  | 88.8974   | 59.4932   |
| 1810058I24Rik | 33.9916    | 39.5783    | 81.8699   | 56.6068   | 80.4997  | 81.4546  | 133.967   | 123.554   |
| 2010111I01Rik | 3.35395    | 3.70341    | 8.60896   | 8.39636   | 11.1739  | 10.046   | 45.3929   | 33.7263   |
| 2010320M18Rik | 6.55763    | 6.78683    | 18.9317   | 10.4527   | 14.529   | 12.7249  | 32.8692   | 39.0564   |
| 2200002D01Rik | 84.9367    | 81.7148    | 203.284   | 83.5675   | 227.833  | 187.137  | 78.2952   | 55.4541   |
| 2210016F16Rik | 2.44364    | 2.53053    | 17.1992   | 15.2755   | 19.5051  | 17.1449  | 24.2342   | 23.5095   |
| 2310007B03Rik | 16.4774    | 16.6449    | 1.39626   | 1.08957   | 2.09504  | 1.54701  | 5.59699   | 5.75977   |
| 2310009A05Rik | 7.67822    | 8.09887    | 24.5848   | 17.8937   | 23.2899  | 19.2154  | 51.113    | 46.5066   |
| 2310022B05Rik | 32.2403    | 28.694     | 13.5857   | 12.6667   | 12.1856  | 12.6229  | 14.4577   | 12.3638   |
| 2310069B03Rik | 3.16834    | 3.583      | 0.897005  | 0.799861  | 0.669998 | 0.688575 | 0         | 0         |
| 2410004I01Rik | 1.72188    | 1.4747     | 0.0578877 | 0.0973209 | 0.194367 | 0.366882 | 0         | 0.189887  |

|                |           |           |           |          |           |           |          |           |
|----------------|-----------|-----------|-----------|----------|-----------|-----------|----------|-----------|
| 2410006H16Rik  | 461.896   | 474.542   | 316.77    | 122.805  | 216.82    | 229.17    | 31.5944  | 26.9819   |
| 2410018L13Rik  | 0.0660142 | 0.0310749 | 1.20638   | 1.07567  | 1.80158   | 1.89115   | 0.196003 | 0         |
| 2510002D24Rik  | 8.61661   | 8.3673    | 19.522    | 16.1967  | 18.5197   | 18.2731   | 16.2079  | 15.7113   |
| 2610528A11Rik  | 1.18883   | 0.593307  | 40.64     | 6.79245  | 2.86805   | 14.0427   | 0.826996 | 1.01526   |
| 2610528J11Rik  | 6.20647   | 5.17491   | 13.8355   | 15.7286  | 12.2094   | 12.7484   | 89.7903  | 73.1263   |
| 2700094K13Rik  | 102.597   | 93.4989   | 267.415   | 131.815  | 264.362   | 239.027   | 20.9119  | 14.0185   |
| 2810008D09Rik  | 10.8917   | 11.5387   | 32.1343   | 13.5023  | 37.2139   | 32.8591   | 53.5104  | 30.7438   |
| 3300005D01Rik  | 11.4695   | 10.1129   | 0.844558  | 0.316177 | 1.94179   | 0.949749  | 0.562409 | 0         |
| 3830406C13Rik  | 2.04623   | 2.22419   | 7.19854   | 6.95726  | 6.9581    | 6.60282   | 20.3309  | 17.1444   |
| 4930426D05Rik  | 0.0281254 | 0.0794232 | 2.0679    | 1.52406  | 1.26851   | 1.15039   | 7.965    | 7.35224   |
| 4930461G14Rik  | 34.521    | 30.8299   | 11.9375   | 8.65409  | 9.51407   | 10.565    | 23.4376  | 36.3355   |
| 4930503L19Rik  | 6.09396   | 7.12735   | 2.3392    | 3.16467  | 2.57369   | 2.80531   | 1.14337  | 1.12495   |
| 4933412E12Rik  | 10.5959   | 9.88703   | 3.10827   | 4.4524   | 3.0045    | 3.166     | 7.4137   | 5.33462   |
| 5430416N02Rik  | 48.2648   | 53.3455   | 22.4528   | 9.94007  | 21.0605   | 18.4423   | 3.71844  | 1.95501   |
| 5830416P10Rik  | 8.31736   | 7.47952   | 1.88927   | 1.1083   | 3.97998   | 2.6051    | 0        | 0.0582638 |
| 8430408G22Rik  | 3.56237   | 2.41545   | 16.2238   | 15.7555  | 16.7043   | 16.3774   | 4.65272  | 2.98777   |
| 9030617O03Rik  | 1.03906   | 1.11542   | 10.737    | 9.60976  | 11.4734   | 10.1794   | 33.1412  | 30.6244   |
| 9030625G05Rik  | 1.58505   | 1.71253   | 0.465256  | 0.130369 | 0.347222  | 0.545974  | 0.276399 | 0.339598  |
| 9130008F23Rik  | 11.6453   | 11.9427   | 4.46839   | 2.30753  | 4.90545   | 4.52437   | 2.56038  | 1.19953   |
| 9330182L06Rik  | 3.79272   | 3.32699   | 0.727248  | 0.993673 | 0.702045  | 0.89517   | 0        | 0.0334764 |
| 9930111J21Rik1 | 1.4983    | 1.51816   | 0.0487784 | 0.166497 | 0.0303652 | 0.0514667 | 0.259869 | 0.121194  |
| A230050P20Rik  | 1.97612   | 2.19391   | 11.6236   | 11.6563  | 11.0768   | 11.117    | 13.3459  | 11.4495   |
| A330074K22Rik  | 1.75796   | 1.81957   | 0.544425  | 0.621225 | 0.196114  | 0.451419  | 0        | 0         |
| AA467197       | 2.18352   | 4.20165   | 1.36081   | 0.408444 | 0.760504  | 0.513868  | 0.515407 | 0.948521  |
| AI506816       | 4.52073   | 4.41047   | 0.978829  | 0.822299 | 1.0917    | 1.55498   | 0        | 0         |
| AW112010       | 0.0677202 | 0.0638337 | 20.7646   | 18.9074  | 13.6329   | 16.2188   | 7.61001  | 10.0807   |
| Aars           | 127.365   | 129.3     | 51.9246   | 63.3788  | 58.9452   | 56.543    | 39.0665  | 40.9052   |
| Aatk           | 3.92613   | 4.0296    | 0.628878  | 0.332318 | 0.161149  | 0.341336  | 1.01668  | 0.47652   |
| Abcb1b         | 16.6006   | 15.8731   | 6.76329   | 6.08582  | 9.12958   | 7.44307   | 2.49869  | 2.21619   |



|          |           |           |           |          |          |          |          |         |
|----------|-----------|-----------|-----------|----------|----------|----------|----------|---------|
| Abcc3    | 0.505753  | 0.44402   | 2.26367   | 3.19579  | 1.93203  | 2.24084  | 39.0534  | 44.7753 |
| Abcd4    | 11.0693   | 9.86218   | 4.97361   | 3.86007  | 4.54489  | 4.90544  | 14.6107  | 8.22584 |
| Abcg2    | 19.1804   | 17.7668   | 6.97428   | 8.11794  | 8.8828   | 8.65154  | 142.521  | 90.1515 |
| Abhd14b  | 6.72559   | 6.30204   | 18.7407   | 15.1148  | 15.249   | 16.3103  | 431.601  | 434.192 |
| Acaa1a   | 19.7063   | 20.5793   | 46.7798   | 36.7237  | 41.0673  | 43.7045  | 85.3581  | 67.8726 |
| Acot1    | 0.852766  | 0.664339  | 4.68833   | 4.05107  | 4.12121  | 3.98686  | 22.3603  | 23.5168 |
| Acp5     | 2.89004   | 3.63117   | 8.81739   | 10.7347  | 7.9498   | 10.6609  | 82.793   | 56.9319 |
| Acsbg1   | 17.2425   | 20.4778   | 5.77912   | 2.89507  | 7.29155  | 6.22621  | 0.279298 | 0.17177 |
| Acsl4    | 16.6405   | 16.6252   | 46.4361   | 68.3865  | 47.4687  | 50.9924  | 7.56044  | 8.27783 |
| Acsl6    | 26.3059   | 24.867    | 3.96889   | 2.80965  | 4.28521  | 3.816    | 0.101342 | 0.18708 |
| Actn1    | 195.822   | 182.512   | 70.3015   | 105.192  | 99.0042  | 90.9135  | 13.1158  | 16.7203 |
| Acyp2    | 0.0818928 | 0.231694  | 3.18827   | 1.99053  | 3.25882  | 3.56315  | 36.2669  | 42.7239 |
| Adamts5  | 11.3774   | 11.2029   | 4.41683   | 4.34798  | 3.90965  | 4.23483  | 6.63433  | 4.32622 |
| Adamts9  | 0.326291  | 0.306909  | 1.38851   | 3.10908  | 1.23849  | 1.78051  | 2.35694  | 2.5184  |
| Adck4    | 4.56226   | 4.10328   | 11.1664   | 9.46347  | 9.50972  | 10.5356  | 12.1253  | 12.2543 |
| Adm      | 0.674363  | 0.666646  | 17.3289   | 9.19944  | 5.52136  | 9.30537  | 8.00834  | 4.6759  |
| Adora1   | 0.973268  | 0.797235  | 4.1136    | 6.80007  | 3.61708  | 4.2561   | 4.04112  | 10.0839 |
| Adssl1   | 11.9298   | 13.5972   | 6.60184   | 5.64414  | 4.08835  | 6.05691  | 7.18035  | 12.3237 |
| Aebp1    | 0.188968  | 0.177697  | 1.17188   | 1.56126  | 0.988241 | 1.11417  | 38.3701  | 34.3318 |
| Aff1     | 15.1425   | 16.0085   | 4.97843   | 9.66463  | 6.11493  | 6.46664  | 8.4607   | 12.0994 |
| Ak1      | 0.850962  | 1.26982   | 7.54744   | 4.39795  | 9.77536  | 8.34583  | 27.8778  | 40.6357 |
| Akr1e1   | 8.14476   | 8.06444   | 24.2657   | 21.4839  | 19.3805  | 20.6085  | 38.5016  | 40.9628 |
| Akr7a5   | 10.4367   | 11.2012   | 29.6481   | 22.639   | 28.4199  | 27.4568  | 198.181  | 172.257 |
| Akt3     | 13.0539   | 13.0515   | 5.3251    | 7.60347  | 5.40593  | 5.61826  | 3.34736  | 3.03969 |
| Alcam    | 5.58776   | 6.19215   | 24.7672   | 36.1099  | 26.6278  | 28.1137  | 4.50765  | 4.79813 |
| Aldh18a1 | 88.6711   | 86.498    | 16.843    | 22.986   | 18.4457  | 19.3714  | 2.17087  | 1.86977 |
| Aldh1a1  | 1.22661   | 1.46355   | 0.0727068 | 0.101882 | 0.217249 | 0.179052 | 10.4189  | 5.28514 |
| Aldh1a3  | 5.61375   | 10.4559   | 14.5325   | 14.8341  | 21.7454  | 17.4238  | 2.6281   | 4.01809 |
| Aldh1l1  | 0.0139851 | 0.0526304 | 1.57724   | 1.57318  | 1.0399   | 1.10954  | 206.326  | 184.897 |



|         |             |           |          |           |          |           |           |           |
|---------|-------------|-----------|----------|-----------|----------|-----------|-----------|-----------|
| Aldh4a1 | 3.94044     | 3.03311   | 18.1896  | 26.5087   | 14.2212  | 17.2975   | 77.4438   | 73.0658   |
| Aldh6a1 | 2.37578     | 2.89962   | 5.90633  | 11.7348   | 4.456    | 6.0374    | 106.783   | 96.1907   |
| Alg10b  | 28.4978     | 27.1541   | 9.44575  | 14.5642   | 10.4888  | 10.3806   | 1.90923   | 3.10368   |
| Alkbh6  | 9.97679     | 10.1452   | 24.5394  | 18.8062   | 20.7785  | 20.663    | 32.8382   | 40.9143   |
| Alox15  | 0           | 0.0170958 | 1.32633  | 1.85858   | 1.35124  | 1.56936   | 0         | 0.132918  |
| Amd1    | 0.0151179   | 0.0141796 | 5.30819  | 0.0139964 | 5.9433   | 0.0175018 | 0.0900749 | 0.0556068 |
| Amotl2  | 69.3266     | 61.4704   | 13.2808  | 16.3171   | 19.1684  | 17.4741   | 21.0516   | 24.2663   |
| Ampd3   | 4.56818     | 4.48861   | 12.3104  | 15.8553   | 6.77394  | 10.3062   | 12.6749   | 15.4755   |
| Anapc11 | 17.9832     | 18.3377   | 46.7493  | 32.5935   | 46.3342  | 42.8421   | 15.068    | 16.8858   |
| Anapc13 | 80.1083     | 83.0056   | 207.134  | 139.934   | 184.553  | 186.706   | 616.38    | 595.661   |
| Ank     | 4.0427      | 3.95309   | 6.82582  | 11.5012   | 9.27551  | 9.0171    | 4.81283   | 6.6382    |
| Ankrd1  | 757.773     | 714.166   | 90.5139  | 49.4869   | 136.489  | 101.159   | 1.82434   | 3.7386    |
| Ankrd11 | 34.261      | 33.732    | 7.65075  | 16.1663   | 8.47148  | 9.76815   | 7.74603   | 7.5146    |
| Ankrd37 | 6.52301     | 5.20052   | 46.7756  | 19.8154   | 24.2338  | 28.302    | 1.32079   | 2.83898   |
| Antxr2  | 37.124      | 44.5142   | 14.74    | 16.1477   | 22.1339  | 18.7241   | 3.25104   | 4.79098   |
| Anxa2   | 669.818     | 620.569   | 1379.47  | 1027.71   | 1540.42  | 1368.8    | 124.045   | 169.557   |
| Anxa8   | 0.763819    | 0.965986  | 13.234   | 8.77237   | 16.9881  | 13.9417   | 1.27703   | 0.872392  |
| Aoc1    | 0           | 0         | 0.91851  | 2.66511   | 0.423869 | 0.836234  | 2.71298   | 6.07795   |
| Ap2s1   | 118.512     | 111.393   | 286.736  | 212.33    | 280.808  | 279.182   | 214.546   | 187.148   |
| Ap4s1   | 2.47051     | 3.10231   | 8.07197  | 6.38177   | 7.90767  | 7.25587   | 27.5062   | 18.1633   |
| Apbb1   | 8.58337     | 8.62899   | 3.19233  | 2.73981   | 1.77627  | 2.20043   | 13.8394   | 14.805    |
| Apcdd1  | 0.728664    | 0.568891  | 3.4803   | 3.40192   | 2.93989  | 3.5821    | 0.922497  | 1.36163   |
| Apip    | 11.0159     | 12.5772   | 27.5782  | 20.6512   | 30.055   | 25.8251   | 23.7871   | 23.2956   |
| Apln    | 13.2052     | 11.0075   | 1.78534  | 0.814168  | 1.78064  | 1.30913   | 9.44717   | 9.61734   |
| Apobec1 | 2.55626     | 3.24945   | 0.464601 | 0.647722  | 0.471042 | 0.653769  | 2.02188   | 3.35401   |
| Apobec3 | 10.387      | 10.9129   | 30.3478  | 29.0309   | 30.1596  | 29.5665   | 5.42607   | 7.83106   |
| Apol9a  | 0.125119    | 0.117787  | 16.0599  | 25.4608   | 19.7343  | 20.0287   | 3.53005   | 2.92468   |
| Apol9b  | 0.307608    | 0.307158  | 17.8483  | 22.462    | 19.2775  | 19.3228   | 2.74069   | 5.61551   |
| Apoo-ps | 0.000942551 | 0.67456   | 2.62498  | 3.58955   | 2.32611  | 4.2468    | 7.69E-60  | 6.38E-05  |

|          |          |          |          |          |          |          |         |         |
|----------|----------|----------|----------|----------|----------|----------|---------|---------|
| App      | 36.6696  | 33.3615  | 138.787  | 220.804  | 119.75   | 146.415  | 311.348 | 365.2   |
| Aqp1     | 9.96172  | 7.28508  | 0.487292 | 0.263386 | 0.604655 | 0.661132 | 366.595 | 679.539 |
| Arg2     | 2.29496  | 2.60125  | 32.1742  | 58.8927  | 25.0275  | 32.5964  | 30.6155 | 45.7759 |
| Arhgef10 | 5.38483  | 5.29406  | 1.70757  | 2.37371  | 1.21537  | 1.44685  | 3.28588 | 3.75966 |
| Arhgef18 | 17.0454  | 15.4659  | 6.22925  | 8.97799  | 7.06228  | 7.62723  | 21.655  | 22.3384 |
| Arhgef5  | 56.2499  | 53.627   | 21.3906  | 27.1778  | 22.9309  | 23.6465  | 14.4042 | 14.1038 |
| Arl4c    | 55.4209  | 61.9895  | 24.0345  | 18.6826  | 31.2508  | 26.0724  | 2.87525 | 2.63326 |
| Arl4d    | 5.08722  | 5.89969  | 17.9116  | 13.8348  | 10.741   | 13.3949  | 24.8054 | 37.6223 |
| Arnt2    | 3.82195  | 4.41253  | 1.19684  | 1.61529  | 1.67515  | 1.5361   | 5.75271 | 4.67661 |
| Arrdc3   | 1.55885  | 1.16337  | 10.2235  | 14.8646  | 8.21547  | 10.3383  | 16.0872 | 21.9986 |
| Asap1    | 29.081   | 26.6786  | 10.6676  | 14.9899  | 12.0508  | 12.1179  | 3.5381  | 4.00167 |
| Asns     | 131.772  | 142.478  | 36.3518  | 41.0817  | 37.6791  | 37.3647  | 7.17683 | 8.99491 |
| Aspa     | 1.0152   | 0.871341 | 4.95913  | 10.7844  | 7.0364   | 7.46879  | 48.4226 | 33.363  |
| Ass1     | 0.524362 | 0.975488 | 1.71689  | 5.76062  | 3.8373   | 3.60847  | 61.4844 | 17.0723 |
| Atf3     | 42.3909  | 50.6283  | 8.54668  | 6.78649  | 8.93233  | 8.41392  | 1.07418 | 0.82558 |
| Atf4     | 375.067  | 428.052  | 201.117  | 142.947  | 212.703  | 193.888  | 98.2434 | 110.827 |
| Atf6     | 8.70424  | 9.06902  | 3.39897  | 4.54897  | 3.66568  | 3.92417  | 5.85373 | 6.13871 |
| Atl1     | 3.75567  | 3.69293  | 1.25955  | 1.43112  | 0.724918 | 1.22136  | 1.28223 | 1.07023 |
| Atox1    | 108.637  | 96.4371  | 299.128  | 174.33   | 281.401  | 283.066  | 472.882 | 340.248 |
| Atp1b1   | 18.9726  | 16.7291  | 59.074   | 122.723  | 53.3173  | 69.2629  | 824.336 | 1212.64 |
| Atp5e    | 145.555  | 133.175  | 463.836  | 228.143  | 432.871  | 390.314  | 1912.96 | 1412.69 |
| Atp5j    | 102.012  | 100.039  | 243.378  | 144.038  | 227.266  | 215.478  | 902.897 | 763.161 |
| Atp6v0d2 | 0        | 0        | 0.966335 | 2.32369  | 0.974668 | 1.20333  | 33.4721 | 25.6344 |
| Atxn2    | 25.9063  | 25.2603  | 10.0676  | 14.5719  | 10.5939  | 12.4107  | 14.3206 | 13.8381 |
| Atxn2l   | 54.0055  | 51.2701  | 21.1356  | 32.6178  | 22.8523  | 24.1089  | 34.385  | 25.1447 |
| Aven     | 8.17188  | 7.93084  | 21.4003  | 13.6866  | 26.49    | 23.0486  | 14.8376 | 12.0601 |
| B2m      | 232.058  | 265.832  | 628.059  | 1005.37  | 673.766  | 709.127  | 1051.48 | 891.375 |
| B3galnt2 | 5.41838  | 6.14136  | 12.3585  | 12.4583  | 14.6945  | 13.1851  | 6.6079  | 4.67991 |
| B3galt4  | 1.91449  | 2.4575   | 6.19835  | 5.69711  | 5.54034  | 5.83123  | 3.61897 | 2.22463 |

|               |             |           |         |          |          |          |          |           |
|---------------|-------------|-----------|---------|----------|----------|----------|----------|-----------|
| B4galnt1      | 26.4841     | 24.8625   | 54.8944 | 61.2144  | 59.97    | 61.0063  | 22.0043  | 31.7071   |
| B4galnt3      | 26.2403     | 22.0917   | 3.95589 | 6.01416  | 4.66909  | 4.82176  | 6.69103  | 4.06173   |
| B4galnt6      | 5.75698     | 5.02779   | 17.5684 | 30.2289  | 20.9224  | 21.9283  | 5.16263  | 7.27835   |
| B930041F14Rik | 0.785816    | 0.564351  | 2.49375 | 2.17361  | 2.61494  | 2.24555  | 2.82839  | 3.10025   |
| B9d1          | 25.1793     | 22.5403   | 64.9678 | 61.1375  | 64.7272  | 65.9946  | 23.2472  | 27.0913   |
| B9d2          | 4.51674     | 5.61242   | 12.6827 | 8.64559  | 13.4812  | 12.1571  | 28.4837  | 23.4465   |
| BC002163      | 0.000934154 | 0.0051502 | 64.0268 | 38.2327  | 16.5688  | 57.8542  | 74.7741  | 97.8633   |
| BC005624      | 24.3341     | 25.8998   | 54.3819 | 49.4954  | 55.2602  | 51.7661  | 18.2149  | 34.9986   |
| BC026585      | 0           | 0         | 1.33447 | 0.509939 | 0.9963   | 0.640453 | 123.712  | 135.411   |
| BC030500      | 0.824757    | 0.428331  | 3.21155 | 5.50596  | 4.02093  | 4.3208   | 0        | 0         |
| BC031181      | 34.7313     | 36.1828   | 89.8978 | 67.7052  | 103.125  | 86.7553  | 70.2052  | 77.9378   |
| Bag1          | 84.4091     | 84.4291   | 199.662 | 157.436  | 202.946  | 198.569  | 381.667  | 460.795   |
| Basp1         | 435.007     | 432.019   | 205.931 | 153.494  | 232.108  | 204.52   | 3.02213  | 3.00829   |
| Bax           | 67.4613     | 66.1627   | 170.248 | 98.135   | 195.371  | 167.64   | 78.0111  | 58.3365   |
| Baz1a         | 26.5254     | 25.3002   | 9.07612 | 14.0416  | 13.3493  | 12.3561  | 1.37244  | 1.51483   |
| Bcap29        | 18.1112     | 19.1895   | 10.2878 | 6.11558  | 9.68346  | 8.98505  | 10.4713  | 11.0361   |
| Bcl2l12       | 7.40794     | 6.50927   | 17.2282 | 13.3039  | 17.4371  | 17.1898  | 9.64272  | 6.41777   |
| Bcl2l15       | 2.44999     | 3.06074   | 6.33386 | 4.53977  | 14.6745  | 9.43876  | 0.536794 | 0.577587  |
| Bcl3          | 10.5602     | 10.8845   | 27.957  | 28.3151  | 27.1303  | 28.6786  | 7.71887  | 6.626     |
| Bdkrb2        | 2.91854     | 3.61194   | 0.29914 | 0.955689 | 0.469172 | 0.726258 | 0        | 0.0987188 |
| Bex1          | 88.5151     | 79.1416   | 27.2251 | 27.659   | 35.7961  | 32.488   | 6.26776  | 4.91791   |
| Bex4          | 1.60657     | 2.27149   | 8.03116 | 7.81292  | 9.48266  | 9.58695  | 50.2857  | 34.2726   |
| Blnk          | 6.49713     | 7.2893    | 19.1299 | 22.9347  | 25.5288  | 24.2179  | 16.3598  | 17.4878   |
| Bloc1s1       | 47.302      | 44.753    | 117.067 | 82.3479  | 113.897  | 111.594  | 472.816  | 347.649   |
| Bmf           | 0.784903    | 0.798432  | 3.69186 | 4.92775  | 1.48136  | 2.67125  | 3.31516  | 4.44638   |
| Bmp8b         | 5.89998     | 5.24648   | 1.36662 | 1.10801  | 1.787    | 1.68243  | 0        | 0.0538487 |
| Bmyc          | 0.732224    | 1.03506   | 11.5173 | 13.4963  | 14.402   | 12.6698  | 13.0021  | 17.0758   |
| Bnip3         | 27.4488     | 31.8644   | 208.341 | 93.29    | 49.7643  | 92.1784  | 80.879   | 73.4098   |
| Bola2         | 85.1987     | 86.3605   | 205.913 | 110.55   | 241.403  | 212.177  | 319.711  | 236.45    |

|               |          |           |          |           |          |           |          |          |
|---------------|----------|-----------|----------|-----------|----------|-----------|----------|----------|
| Brcc3         | 15.6203  | 13.9088   | 32.9658  | 29.0538   | 29.8721  | 31.1815   | 19.4756  | 17.339   |
| Brsk1         | 11.3747  | 11.2576   | 3.92746  | 3.04223   | 4.19509  | 3.91589   | 1.94948  | 1.27862  |
| Bscl2         | 3.89026  | 3.54805   | 11.0544  | 7.78976   | 10.4209  | 9.59934   | 70.389   | 67.7803  |
| Bst2          | 94.1873  | 95.4602   | 519.493  | 439.722   | 524.073  | 510.893   | 54.4801  | 53.1585  |
| Btn1a1        | 1.67808  | 1.81258   | 0.261099 | 0.219535  | 0.261861 | 0.261     | 0        | 0        |
| C1ql1         | 5.04929  | 4.64729   | 0.925452 | 0.353639  | 0.80081  | 0.710674  | 0.225312 | 0.276916 |
| C230052I12Rik | 4.56394  | 4.74651   | 9.71191  | 9.54956   | 11.1623  | 10.5752   | 4.79577  | 4.42263  |
| C3            | 1.55104  | 1.45897   | 56.1841  | 189.744   | 44.7163  | 78.6041   | 3.46994  | 2.79603  |
| Cacna1g       | 1.32042  | 0.972233  | 0.062534 | 0.0902332 | 0.152987 | 0.0834088 | 1.12708  | 0.773311 |
| Cacnb1        | 2.65063  | 2.34928   | 0.945983 | 0.590769  | 0.605891 | 0.613223  | 3.93325  | 5.32595  |
| Cad           | 31.3554  | 26.1235   | 10.3065  | 13.8029   | 15.3639  | 13.6593   | 2.57638  | 2.48467  |
| Calcb         | 0.516483 | 0.486567  | 12.6054  | 11.6558   | 17.8921  | 14.5859   | 0.306038 | 0        |
| Cald1         | 175.655  | 157.042   | 22.2298  | 22.649    | 29.8562  | 25.5198   | 22.3404  | 27.7928  |
| Caly          | 0        | 0.0474488 | 0.949833 | 1.31508   | 0.687917 | 1.36844   | 0        | 0        |
| Camk1         | 35.0452  | 43.8486   | 19.388   | 9.68355   | 15.3453  | 17.4095   | 50.8318  | 47.3954  |
| Camk2b        | 0.608542 | 0.613108  | 3.52635  | 3.20604   | 3.70758  | 3.37887   | 1.53503  | 1.25897  |
| Cand2         | 5.88202  | 6.07662   | 1.89977  | 2.66471   | 1.41353  | 2.05821   | 2.66292  | 3.50231  |
| Capsl         | 1.79244  | 3.17869   | 8.07168  | 8.75171   | 8.05185  | 8.64984   | 1.87405  | 1.91839  |
| Car2          | 19.0894  | 14.53     | 47.9697  | 45.1577   | 52.7131  | 48.044    | 345.767  | 339.754  |
| Casp12        | 0.117185 | 0.26778   | 2.62907  | 3.54924   | 2.03347  | 2.26641   | 2.19114  | 1.16376  |
| Casp4         | 0.355862 | 0.548218  | 7.16566  | 10.5725   | 5.4978   | 6.77067   | 1.92122  | 1.77128  |
| Cav1          | 49.2852  | 43.1696   | 16.3632  | 12.5144   | 17.1628  | 15.3975   | 36.1305  | 21.4898  |
| Cbl           | 5.72019  | 4.74122   | 0.989465 | 3.80552   | 1.30442  | 1.68187   | 0.543066 | 0.728896 |
| Cbr2          | 0.528554 | 0.543137  | 19.2906  | 27.8182   | 10.3197  | 15.4778   | 21.9324  | 10.6734  |
| Cbr3          | 0.491822 | 0.501757  | 13.7183  | 14.0528   | 10.325   | 12.7594   | 3.89045  | 2.53989  |
| Ccdc125       | 2.04765  | 2.5568    | 5.59959  | 5.36565   | 5.5788   | 5.16954   | 2.33481  | 2.64841  |
| Ccdc23        | 14.1299  | 12.3977   | 32.9805  | 20.798    | 31.5325  | 31.0454   | 30.5596  | 32.2259  |
| Ccdc28b       | 3.36107  | 3.80092   | 13.2309  | 11.1213   | 8.04691  | 12.3305   | 24.2345  | 18.4337  |
| Ccdc88c       | 7.21728  | 6.50694   | 2.04334  | 4.2088    | 2.38154  | 2.84583   | 3.13006  | 1.8525   |

|          |           |          |           |           |           |           |           |          |
|----------|-----------|----------|-----------|-----------|-----------|-----------|-----------|----------|
| Ccl2     | 0.837177  | 1.39599  | 9.58399   | 10.3401   | 17.0425   | 14.5104   | 1.5241    | 0.935706 |
| Ccl5     | 4.33202   | 8.93348  | 28.9955   | 25.6462   | 37.4886   | 33.7758   | 14.7548   | 4.93252  |
| Ccng1    | 27.2825   | 35.1891  | 85.9486   | 68.4986   | 108.64    | 92.8379   | 48.0395   | 42.4108  |
| Ccnjl    | 2.10306   | 1.93346  | 4.98885   | 5.16486   | 5.253     | 5.80783   | 0.573113  | 0.704926 |
| Ccrn4l   | 34.3285   | 34.1623  | 15.0615   | 10.6381   | 15.2788   | 14.4988   | 6.94378   | 7.15215  |
| Cd14     | 7.65964   | 9.06402  | 91.2552   | 101.52    | 66.7715   | 84.4339   | 8.0395    | 9.09717  |
| Cd200    | 0.0374569 | 0        | 1.13941   | 1.09733   | 0.742903  | 0.918239  | 13.5905   | 13.906   |
| Cd24a    | 219.324   | 207.102  | 594.591   | 596.139   | 554.854   | 553.186   | 151.444   | 282.496  |
| Cd47     | 9.05161   | 10.9182  | 29.6874   | 25.8955   | 25.52     | 25.2148   | 9.59406   | 8.54894  |
| Cd82     | 32.0756   | 34.9188  | 137.432   | 131.178   | 146.761   | 138.307   | 124.172   | 209.725  |
| Cd83     | 0.868975  | 1.26557  | 4.12613   | 3.11928   | 4.00364   | 3.98809   | 1.10732   | 1.06271  |
| Cdc42ep1 | 38.6173   | 40.3145  | 17.7724   | 16.3172   | 17.8513   | 17.5916   | 32.0017   | 22.3838  |
| Cdc42ep2 | 3.5537    | 3.17088  | 8.99954   | 8.63047   | 7.97249   | 7.83898   | 16.3355   | 18.2769  |
| Cdc42ep3 | 11.2581   | 9.42034  | 1.80835   | 2.11165   | 3.12373   | 2.88944   | 7.15208   | 9.20978  |
| Cdh10    | 2.17905   | 2.74915  | 0.111401  | 0.0234169 | 0.0624348 | 0.117546  | 0         | 0        |
| Cdh3     | 34.7592   | 31.0418  | 12.9626   | 19.1827   | 15.1558   | 15.3726   | 2.3207    | 2.39204  |
| Cdh6     | 7.40091   | 7.24405  | 9.11882   | 27.5736   | 12.1693   | 13.8352   | 1.67459   | 2.24144  |
| Cdk14    | 6.81278   | 7.60449  | 2.76294   | 3.49672   | 2.12883   | 2.46424   | 1.33017   | 1.29035  |
| Cdkl1    | 1.12824   | 0.834403 | 8.74234   | 14.5      | 4.46393   | 7.56457   | 66.0872   | 97.7422  |
| Cdkn2d   | 6.49831   | 7.37751  | 19.7892   | 10.9987   | 13.8219   | 15.9426   | 12.7831   | 8.66834  |
| Ceacam1  | 0.461313  | 0.222527 | 12.5426   | 19.1995   | 9.29357   | 11.4119   | 12.9747   | 13.5766  |
| Cebpa    | 0.165199  | 0.279789 | 1.80967   | 2.62824   | 0.962743  | 1.85182   | 13.5709   | 11.4909  |
| Cebpb    | 20.5305   | 22.3769  | 46.5389   | 72.1916   | 58.0272   | 57.554    | 8.45393   | 9.72962  |
| Cebpd    | 1.92333   | 2.4458   | 5.03997   | 10.0386   | 6.94637   | 7.38011   | 18.6662   | 22.2972  |
| Cenpm    | 11.7371   | 11.1025  | 38.7775   | 24.1069   | 27.7815   | 31.0531   | 0.771997  | 0.576281 |
| Cep170   | 12.7522   | 13.1501  | 4.89857   | 6.10566   | 5.79812   | 5.66637   | 1.57881   | 1.19206  |
| Cers3    | 1.40196   | 1.67982  | 0.0584917 | 0.0368852 | 0.213076  | 0.0925785 | 0.0787191 | 0.145251 |
| Cetn2    | 18.3383   | 17.8751  | 47.7334   | 41.4392   | 44.8648   | 44.3333   | 53.687    | 47.504   |
| Cetn4    | 1.4256    | 1.86253  | 4.84417   | 4.2865    | 3.48211   | 4.09284   | 13.0882   | 17.0863  |

|        |            |            |          |          |          |         |          |          |
|--------|------------|------------|----------|----------|----------|---------|----------|----------|
| Cfh    | 0.00971041 | 0.00913448 | 1.55624  | 3.73606  | 0.842208 | 1.47209 | 50.591   | 57.5104  |
| Cfi    | 0.0857231  | 0          | 1.92062  | 2.61157  | 0.717367 | 1.20121 | 7.64586  | 5.01469  |
| Chac1  | 58.6849    | 59.4407    | 6.48773  | 7.00115  | 4.66424  | 4.32728 | 1.03916  | 1.70342  |
| Chac2  | 4.34164    | 4.99856    | 11.6869  | 12.5118  | 11.649   | 11.2649 | 16.9295  | 20.004   |
| Chd1   | 24.3262    | 23.1665    | 8.4421   | 12.5176  | 10.2661  | 9.81248 | 4.38296  | 3.77517  |
| Chdh   | 0.516799   | 0.326394   | 5.00977  | 7.0379   | 1.98539  | 3.94789 | 32.5978  | 41.4648  |
| Chil1  | 0          | 0          | 6.21479  | 4.975    | 5.06356  | 4.95935 | 0        | 0.294404 |
| Chka   | 55.4289    | 54.029     | 21.2166  | 15.4385  | 26.488   | 22.8471 | 49.1323  | 36.8264  |
| Chst13 | 0.0275541  | 0.129681   | 0.854078 | 1.38481  | 1.29851  | 1.35233 | 0.32745  | 0.503245 |
| Chst8  | 0.0183072  | 0.0344531  | 0.830241 | 1.992    | 0.907722 | 1.0685  | 5.98933  | 10.1118  |
| Chst9  | 0.10217    | 0          | 1.35803  | 2.66394  | 1.05623  | 1.71256 | 1.21327  | 3.47982  |
| Ciart  | 12.4327    | 14.9058    | 5.1315   | 2.88638  | 2.64628  | 3.46883 | 2.37506  | 1.82469  |
| Cib1   | 26.715     | 26.3927    | 96.5158  | 71.1274  | 105.775  | 94.8245 | 210.386  | 165.527  |
| Cisd1  | 33.2383    | 28.0167    | 74.2026  | 49.9481  | 76.535   | 70.8426 | 220.736  | 220.6    |
| Cited1 | 0.407676   | 0.19214    | 7.42148  | 3.80841  | 1.77545  | 3.35163 | 10.4482  | 10.3741  |
| Cited2 | 78.5828    | 78.1379    | 16.1817  | 23.2655  | 18.0469  | 17.8734 | 46.6391  | 67.3805  |
| Cited4 | 0.600709   | 0.424225   | 2.49592  | 5.66533  | 1.86336  | 2.6354  | 8.69031  | 8.48989  |
| Ckb    | 37.3582    | 30.9675    | 17.315   | 7.61261  | 20.7883  | 17.6591 | 317.537  | 517.286  |
| Ckmt1  | 1.35179    | 1.43491    | 3.78929  | 3.53377  | 4.53018  | 3.86561 | 75.0142  | 86.343   |
| Clca4  | 39.4097    | 45.5387    | 8.50729  | 7.33425  | 7.84438  | 7.33901 | 0        | 0        |
| Clcn5  | 6.42999    | 5.98155    | 1.34805  | 3.60203  | 2.26741  | 2.44076 | 2.27927  | 1.69063  |
| Cldn12 | 43.0192    | 43.1351    | 17.788   | 20.3188  | 21.0969  | 18.5907 | 18.3259  | 17.546   |
| Cldn19 | 0.0200376  | 0.00942468 | 1.4419   | 3.21517  | 1.35779  | 1.86322 | 63.7151  | 106.705  |
| Cldn2  | 0.0562885  | 0.0529581  | 2.6918   | 5.16759  | 1.77885  | 2.61053 | 67.1648  | 72.0076  |
| Cldn23 | 3.3247     | 3.58591    | 1.128    | 0.858043 | 0.872633 | 1.02051 | 0.144253 | 0.266068 |
| Cldn4  | 350.886    | 400.635    | 189.742  | 141.088  | 204.784  | 185.957 | 16.6978  | 22.3487  |
| Cldn9  | 0.192424   | 0.27173    | 1.74033  | 1.52282  | 1.59126  | 1.19987 | 0.190463 | 0.234134 |
| Clec2d | 0.430461   | 0.184249   | 8.28269  | 12.2126  | 4.80733  | 6.41061 | 42.9595  | 35.3879  |
| Clec2f | 0          | 0          | 1.59381  | 1.33949  | 1.99125  | 1.09033 | 0        | 0.305186 |

|        |           |           |          |          |          |          |           |           |
|--------|-----------|-----------|----------|----------|----------|----------|-----------|-----------|
| Clic6  | 0.0570138 | 0.0536355 | 1.2479   | 0.837284 | 0.847777 | 0.98419  | 0.135763  | 0.0835078 |
| Clip2  | 12.4702   | 11.1708   | 4.77558  | 5.88217  | 5.35306  | 5.1484   | 8.62929   | 8.02433   |
| Clip3  | 6.50936   | 6.58943   | 2.25977  | 2.10577  | 2.19414  | 1.88325  | 2.16964   | 1.90638   |
| Cluap1 | 5.61345   | 6.25456   | 14.9344  | 13.5688  | 15.6643  | 15.5308  | 20.9292   | 24.5806   |
| Cmpk2  | 0.809882  | 0.660356  | 4.93984  | 11.6322  | 5.63724  | 6.69271  | 6.10549   | 8.94331   |
| Cndp2  | 21.8575   | 17.5241   | 48.1255  | 56.3114  | 53.5111  | 52.0674  | 233.706   | 191.125   |
| Cnm4   | 9.40779   | 9.79629   | 3.52033  | 4.08394  | 4.18666  | 4.54312  | 4.56292   | 5.51228   |
| Cnpy2  | 36.5467   | 49.2511   | 106.282  | 90.9636  | 95.7162  | 96.8726  | 134.791   | 114.269   |
| Cntn2  | 7.47753   | 7.31892   | 0.451463 | 0.218076 | 0.403885 | 0.273594 | 0.0777049 | 0.0159361 |
| Coa3   | 62.6216   | 60.5943   | 197.695  | 153.087  | 189.359  | 184.87   | 187.908   | 226.574   |
| Coa4   | 5.4266    | 4.99785   | 19.4458  | 17.266   | 17.1599  | 17.5799  | 11.6792   | 17.0311   |
| Col4a2 | 46.3592   | 38.0577   | 14.4498  | 21.2398  | 16.6279  | 17.9456  | 40.5172   | 37.0438   |
| Col4a3 | 4.24088   | 4.17471   | 0.655624 | 0.900877 | 0.770963 | 0.719755 | 38.2002   | 29.2322   |
| Col6a1 | 0.203375  | 0.201389  | 2.14156  | 1.59175  | 1.76401  | 2.03486  | 13.4463   | 13.0533   |
| Col7a1 | 5.67778   | 6.03142   | 1.59431  | 0.775025 | 2.19541  | 1.68188  | 0.967264  | 0.562049  |
| Col8a1 | 25.4516   | 23.84     | 1.7312   | 1.17984  | 1.72631  | 1.62459  | 0.392799  | 0.302047  |
| Comm3  | 40.3539   | 44.0453   | 106.898  | 71.4867  | 111.538  | 95.7198  | 65.7879   | 60.2854   |
| Coro6  | 3.60974   | 3.65439   | 0.683146 | 0.675663 | 0.495035 | 0.721298 | 0.215294  | 0.529284  |
| Cotl1  | 40.7252   | 46.0741   | 22.9112  | 16.3405  | 21.0843  | 19.1532  | 141.953   | 90.6128   |
| Cox14  | 55.6014   | 53.7503   | 141.906  | 73.6257  | 118.511  | 110.008  | 125.747   | 123.964   |
| Cox16  | 3.41561   | 3.48758   | 8.84326  | 5.17131  | 8.74628  | 8.49924  | 11.4148   | 8.73229   |
| Cox17  | 90.6765   | 97.6149   | 240.418  | 145.445  | 238.206  | 219.699  | 382.771   | 347.232   |
| Cox20  | 11.1364   | 15.1576   | 43.5305  | 27.2171  | 45.9517  | 35.723   | 257.561   | 204.547   |
| Cox6b2 | 2.91444   | 3.36101   | 25.8905  | 8.43611  | 21.3086  | 15.0775  | 33.2105   | 18.2724   |
| Cox7a1 | 3.17167   | 4.60419   | 10.9399  | 4.99272  | 8.20533  | 10.5985  | 230.119   | 181.951   |
| Cp     | 0.839405  | 1.47817   | 32.0286  | 66.9634  | 29.5261  | 36.3037  | 22.8285   | 33.0822   |
| Cpm    | 9.28856   | 7.30384   | 15.4691  | 28.7328  | 10.7849  | 14.7705  | 6.51637   | 10.0663   |
| Cpn1   | 1.10741   | 1.01861   | 6.07258  | 4.70736  | 4.08835  | 5.67467  | 83.9203   | 49.5706   |
| Cpne8  | 31.2882   | 30.3516   | 11.2542  | 11.8033  | 14.9278  | 11.5237  | 6.89867   | 9.48433   |

|          |           |          |          |          |          |          |          |          |
|----------|-----------|----------|----------|----------|----------|----------|----------|----------|
| Cpped1   | 7.29238   | 7.75377  | 16.9252  | 15.1124  | 17.8744  | 17.0973  | 21.5964  | 27.64    |
| Cr1l     | 6.09914   | 6.04989  | 17.4697  | 13.5673  | 17.8071  | 15.5004  | 24.2153  | 24.5774  |
| Crabp2   | 14.7436   | 16.3744  | 4.35506  | 2.92862  | 4.7343   | 3.48343  | 0.996018 | 0.815569 |
| Creb3l4  | 0.324636  | 0.611188 | 2.7448   | 3.18671  | 2.56223  | 2.27664  | 1.05193  | 1.83209  |
| Creb5    | 4.85525   | 4.92282  | 0.633599 | 0.771055 | 0.859636 | 0.73897  | 0        | 0.110365 |
| Creg1    | 2.62831   | 2.86599  | 6.64652  | 8.20763  | 7.73222  | 7.6967   | 35.1041  | 32.4159  |
| Crim1    | 20.2607   | 18.1563  | 3.61549  | 4.92385  | 4.74636  | 4.38485  | 11.3263  | 15.4985  |
| Crip1    | 1.49028   | 2.67641  | 64.0365  | 41.7471  | 58.581   | 55.1083  | 71.6078  | 50.2505  |
| Crip2    | 31.6573   | 32.9835  | 89.5012  | 81.5646  | 121.239  | 107.955  | 111.963  | 134.581  |
| Crisp1   | 0.0655358 | 0        | 3.22992  | 4.30194  | 5.04032  | 4.17624  | 0        | 0        |
| Crispld2 | 0.348007  | 0.27923  | 5.5097   | 12.3189  | 5.31396  | 7.03078  | 5.66752  | 5.99782  |
| Crmp1    | 2.0829    | 2.26119  | 0.112739 | 0.108333 | 0.19857  | 0.186948 | 0.086662 | 0.106609 |
| Cryl1    | 3.81953   | 3.34793  | 10.1381  | 8.79905  | 8.20993  | 8.85519  | 151.926  | 101.429  |
| Csdc2    | 1.52877   | 1.30622  | 6.04439  | 6.63442  | 6.38183  | 7.01447  | 2.71786  | 2.50707  |
| Csf1     | 48.4895   | 45.4299  | 10.9758  | 18.2735  | 14.9702  | 14.8519  | 6.28757  | 6.12987  |
| Csf1r    | 6.99349   | 7.33414  | 1.00887  | 0.531449 | 0.654019 | 0.833619 | 39.4745  | 42.1597  |
| Csf2     | 40.4144   | 46.7702  | 3.20502  | 1.45753  | 3.94066  | 3.38502  | 0        | 0        |
| Csn3     | 3.31757   | 3.74207  | 0.759919 | 1.27777  | 1.45426  | 1.57095  | 0        | 0        |
| Csnk1e   | 100.69    | 92.0023  | 31.34    | 34.4666  | 38.7308  | 37.7548  | 9.33671  | 10.0522  |
| Csrnp1   | 10.0693   | 7.82436  | 3.08186  | 2.22901  | 3.15702  | 3.18213  | 4.19072  | 3.07092  |
| Cstb     | 167.558   | 198.379  | 489.593  | 357.239  | 489.438  | 443.855  | 124.468  | 116.907  |
| Ctgf     | 433.509   | 400.529  | 88.9189  | 70.9392  | 142.147  | 113.817  | 32.27    | 26.5928  |
| Cth      | 9.98046   | 14.0079  | 4.26338  | 3.9801   | 4.52844  | 3.8572   | 141.537  | 158.221  |
| Ctla2b   | 12.7202   | 18.1036  | 6.79489  | 2.66864  | 10.2701  | 5.94861  | 2.95584  | 1.92633  |
| Ctsh     | 17.3294   | 15.9156  | 61.721   | 38.0096  | 49.1138  | 50.2187  | 124.658  | 161.675  |
| Ctsw     | 1.38481   | 3.33243  | 0.213123 | 0.286667 | 0.286386 | 0.315053 | 0.913121 | 0.140279 |
| Ctnbp2nl | 45.5659   | 48.1736  | 14.659   | 16.4877  | 16.3784  | 15.7918  | 3.84508  | 5.62566  |
| Cutc     | 2.09655   | 2.90445  | 7.23454  | 4.79569  | 6.57425  | 7.02984  | 9.80002  | 11.9839  |
| Cwh43    | 3.55836   | 3.04643  | 0.567229 | 0.566345 | 0.397327 | 0.430223 | 13.2562  | 13.3725  |



|               |           |           |          |          |          |          |          |          |
|---------------|-----------|-----------|----------|----------|----------|----------|----------|----------|
| Cxcl1         | 245.612   | 260.087   | 87.8605  | 65.5296  | 117.831  | 92.8083  | 0.622281 | 0.573306 |
| Cxcl17        | 0.0694539 | 0         | 7.09981  | 6.81067  | 3.71156  | 3.67001  | 0        | 0        |
| Cxcl2         | 8.28297   | 9.40373   | 24.0752  | 23.9524  | 37.0117  | 31.8737  | 0        | 0.16312  |
| Cxcl5         | 15.9275   | 19.8517   | 43.0763  | 45.1864  | 56.6007  | 49.0006  | 0        | 0        |
| Cxx1a         | 1.18287   | 0.904943  | 4.70975  | 3.82168  | 5.13669  | 4.88636  | 20.185   | 16.7191  |
| Cxx1b         | 1.19248   | 1.05044   | 4.94445  | 3.79834  | 5.34588  | 4.81581  | 28.3068  | 21.4628  |
| Cyb5          | 60.3776   | 60.1883   | 158.102  | 130.24   | 184.215  | 164.762  | 1316.99  | 978.422  |
| Cyld          | 10.4186   | 11.0453   | 3.87179  | 4.59562  | 4.37985  | 4.34517  | 5.04515  | 5.2342   |
| Cyp1b1        | 0.484675  | 0.517722  | 4.67539  | 3.02285  | 4.4273   | 4.51125  | 6.16413  | 7.3733   |
| Cyp24a1       | 0         | 0         | 4.49651  | 5.768    | 2.55234  | 3.48241  | 4.11207  | 1.62249  |
| Cyp26a1       | 0.278575  | 0.309869  | 2.49464  | 4.52462  | 1.72718  | 2.18936  | 1.05363  | 0.462689 |
| Cyp2j6        | 0.0118961 | 0.0783396 | 0.907415 | 0.884601 | 1.22353  | 0.888067 | 22.0941  | 17.7277  |
| Cyr61         | 691.982   | 623.58    | 35.4605  | 37.9207  | 69.0167  | 52.3451  | 9.78871  | 15.4883  |
| Cys1          | 0.434308  | 0.312585  | 3.42289  | 5.09972  | 1.35419  | 3.22847  | 66.4939  | 61.9335  |
| D10Jhu81e     | 11.8431   | 12.1815   | 29.0041  | 25.8817  | 23.9066  | 25.7786  | 136.162  | 172.117  |
| D330041H03Rik | 1.4882    | 1.17386   | 7.71468  | 0.561952 | 9.16759  | 5.18978  | 75.4104  | 71.2048  |
| D630039A03Rik | 0.029902  | 0.0140669 | 1.19035  | 1.69587  | 0.500302 | 0.854835 | 18.5943  | 12.9133  |
| D630045M09Rik | 22.5421   | 19.7352   | 2.15077  | 1.20542  | 2.94393  | 2.69139  | 17.9272  | 21.7723  |
| Daam1         | 9.39833   | 9.66319   | 3.66456  | 4.87977  | 3.79544  | 3.82378  | 4.41167  | 4.67098  |
| Dab2          | 5.28741   | 4.53761   | 1.77837  | 1.73046  | 1.82641  | 1.62034  | 109.19   | 75.3158  |
| Dad1          | 119.794   | 111.946   | 256.161  | 186.269  | 288.646  | 249.268  | 309.904  | 279.317  |
| Dalrd3        | 13.7963   | 13.8935   | 31.6781  | 31.3951  | 32.9365  | 33.9532  | 76.0232  | 51.2264  |
| Dapk1         | 6.61501   | 6.01285   | 13.8267  | 22.0679  | 13.0534  | 15.2323  | 14.2     | 14.4304  |
| Dbi           | 264.996   | 258.136   | 830.703  | 515.428  | 727.818  | 688.074  | 946.668  | 948.047  |
| Dbnidd1       | 8.37145   | 8.89145   | 4.41298  | 2.86782  | 4.24817  | 3.62185  | 0.357079 | 0.346413 |
| Dcdc2a        | 0.988741  | 1.04817   | 4.21576  | 7.03713  | 2.55492  | 3.8483   | 3.32425  | 4.73494  |
| Dclk3         | 6.35423   | 4.78001   | 2.47693  | 1.63879  | 2.50333  | 2.42786  | 15.5959  | 19.4096  |
| Dcxr          | 4.86857   | 6.03018   | 40.7314  | 31.1257  | 33.4909  | 38.539   | 277.688  | 158.404  |
| Ddah1         | 56.2438   | 50.2323   | 18.345   | 17.7962  | 18.9125  | 18.1605  | 56.0075  | 42.7499  |

|         |           |           |          |          |          |          |          |          |
|---------|-----------|-----------|----------|----------|----------|----------|----------|----------|
| Ddi2    | 22.9382   | 20.0989   | 6.29015  | 14.3324  | 8.26045  | 8.79259  | 5.858    | 3.66777  |
| Ddit4l  | 0.814893  | 1.18768   | 3.76374  | 2.77825  | 4.27765  | 4.21411  | 8.55627  | 10.7581  |
| Ddt     | 21.8007   | 20.7447   | 66.3661  | 58.0491  | 69.9701  | 61.6996  | 209.11   | 182.054  |
| Ddx58   | 5.51264   | 5.55471   | 13.1183  | 25.2167  | 15.7427  | 17.5219  | 9.40125  | 11.5353  |
| Ddx60   | 0.0489894 | 0.0724105 | 1.10587  | 2.24338  | 0.745636 | 1.34618  | 0.291787 | 0.4103   |
| Def8    | 20.585    | 18.3298   | 7.82077  | 9.55662  | 8.75577  | 8.57114  | 29.3229  | 25.9949  |
| Derl3   | 0.035024  | 0.032976  | 1.08633  | 1.46776  | 0.477965 | 0.778293 | 1.45552  | 0.894532 |
| Dhh     | 16.3493   | 14.4065   | 3.75649  | 4.12487  | 5.52091  | 4.26761  | 1.3246   | 1.28971  |
| Dhrs3   | 4.66512   | 4.79712   | 145.079  | 124.461  | 85.3362  | 108.879  | 251.317  | 211.447  |
| Dhrs4   | 10.215    | 10.281    | 33.1081  | 27.4385  | 31.7392  | 32.773   | 93.2078  | 79.7409  |
| Dhx58   | 0.436427  | 0.410665  | 5.69221  | 11.9394  | 4.62087  | 6.81371  | 1.83887  | 2.39466  |
| Dmpk    | 2.04561   | 2.31022   | 7.36348  | 5.58178  | 6.16113  | 6.42168  | 12.263   | 10.251   |
| Dmtf1   | 26.4895   | 28.0713   | 12.3059  | 13.054   | 11.1649  | 10.5574  | 13.8906  | 10.1637  |
| Dnajc15 | 27.3056   | 25.836    | 60.5772  | 36.8578  | 66.751   | 58.4915  | 163.694  | 146.437  |
| Dnajc22 | 2.08544   | 1.81453   | 0.454889 | 0.088253 | 0.391937 | 0.406348 | 16.8897  | 16.8408  |
| Dnajc30 | 6.69363   | 7.39299   | 17.123   | 13.6914  | 15.7511  | 14.8312  | 53.4345  | 50.5301  |
| Dnlz    | 5.74679   | 5.77507   | 13.9159  | 12.0725  | 15.8549  | 13.8728  | 18.7515  | 18.4936  |
| Dnm1    | 3.82163   | 3.8603    | 1.62003  | 1.60314  | 0.628607 | 1.28856  | 2.8858   | 3.34372  |
| Dpp4    | 0.255654  | 0.345682  | 2.65745  | 3.67464  | 1.09866  | 1.89695  | 20.4566  | 20.1154  |
| Dpysl5  | 12.5187   | 11.7678   | 3.47962  | 3.86983  | 3.26637  | 3.40681  | 0.100001 | 0.123035 |
| Dsc2    | 12.8843   | 12.4089   | 4.80339  | 6.38365  | 3.82756  | 4.1953   | 0.74261  | 0.456809 |
| Dsg2    | 38.5203   | 35.957    | 13.5196  | 19.3593  | 12.3889  | 13.6056  | 4.75602  | 5.52959  |
| Dtna    | 2.29717   | 2.39584   | 0.6874   | 0.512009 | 0.585961 | 0.514296 | 1.97074  | 2.1524   |
| Dtx3l   | 2.71449   | 2.84565   | 7.14164  | 15.7645  | 6.76638  | 8.55245  | 2.52919  | 2.59059  |
| Dusp1   | 136.432   | 111.004   | 9.27176  | 7.19565  | 14.3842  | 11.8561  | 27.3696  | 35.2547  |
| Dusp2   | 11.1608   | 10.1077   | 3.21377  | 2.17726  | 5.34785  | 3.98534  | 0.669819 | 0.308818 |
| Dusp4   | 28.1066   | 31.5635   | 7.83204  | 8.92004  | 12.2701  | 10.0786  | 0.859599 | 0.462536 |
| Dusp5   | 55.5919   | 51.3374   | 12.7832  | 19.4052  | 23.9923  | 19.9085  | 0        | 0.453665 |
| Dusp8   | 3.62718   | 3.70039   | 0.716529 | 0.920004 | 1.0638   | 0.817267 | 0.782592 | 0.834457 |

|           |          |          |           |           |           |          |           |           |
|-----------|----------|----------|-----------|-----------|-----------|----------|-----------|-----------|
| Dusp9     | 23.9573  | 19.9037  | 8.83736   | 6.77124   | 13.4789   | 11.5067  | 2.30061   | 2.18125   |
| Dynll1    | 78.9704  | 77.9477  | 190.727   | 124.73    | 210.322   | 184.753  | 79.9158   | 64.9259   |
| Ebp       | 16.44    | 16.916   | 39.8143   | 31.0325   | 40.7083   | 37.2618  | 108.816   | 88.0587   |
| Echs1     | 32.2614  | 36.4215  | 79.0454   | 76.1495   | 76.3902   | 76.3307  | 112.146   | 123.876   |
| Ecm1      | 15.2011  | 15.1051  | 76.9197   | 40.6489   | 84.9334   | 78.0182  | 121.36    | 138.364   |
| Ecsr      | 5.86369  | 4.66341  | 17.6712   | 17.2839   | 26.0918   | 23.2889  | 13.3959   | 11.3959   |
| Eda2r     | 0.137014 | 0.266063 | 1.55836   | 1.60955   | 2.04924   | 1.64446  | 0.333797  | 0.19569   |
| Efemp1    | 0.240423 | 0.329105 | 4.71577   | 8.47866   | 3.30592   | 5.13029  | 24.042    | 35.0789   |
| Efhd1     | 0.499047 | 0.469699 | 3.01017   | 2.78619   | 0.928217  | 1.74896  | 124.432   | 163.397   |
| Efna3     | 3.48509  | 2.95356  | 0.77237   | 0.757528  | 0.624645  | 0.951482 | 0.689382  | 1.27088   |
| Egfr      | 38.3818  | 33.7993  | 11.9363   | 16.3275   | 15.2779   | 14.6232  | 8.23087   | 7.56058   |
| Egln3     | 3.61098  | 3.09151  | 19.7333   | 11.6307   | 5.96748   | 10.5353  | 7.16145   | 8.03476   |
| Egr1      | 207.864  | 194.971  | 28.5391   | 40.1061   | 37.0348   | 36.5371  | 6.18444   | 4.67751   |
| Ehf       | 14.335   | 15.8837  | 46.3683   | 65.578    | 37.9766   | 45.1258  | 12.7687   | 24.448    |
| Eid2      | 3.47065  | 3.95586  | 10.6044   | 5.95464   | 10.4706   | 9.70092  | 7.15614   | 9.86171   |
| Eif4ebp1  | 312.276  | 322.634  | 170.288   | 115.213   | 141.762   | 143.409  | 34.9682   | 47.9148   |
| Elf3      | 19.3996  | 18.6563  | 89.6808   | 85.8374   | 60.3434   | 79.2329  | 19.7891   | 30.8522   |
| Elmod1    | 1.40622  | 1.02386  | 0.0740583 | 0.0778343 | 0.0829989 | 0.039076 | 0.0995974 | 0.306253  |
| Elovl4    | 4.26749  | 4.34738  | 0.234367  | 0.197056  | 0.455323  | 0.461634 | 0         | 0.155165  |
| Emb       | 28.7271  | 27.4835  | 66.5015   | 100.898   | 64.6189   | 71.3996  | 19.4847   | 19.5861   |
| Eml5      | 2.33843  | 2.42363  | 0.582037  | 0.609944  | 0.635104  | 0.554751 | 2.7462    | 1.67091   |
| Emp1      | 252.293  | 236.252  | 59.5837   | 53.4255   | 82.721    | 66.4027  | 18.7287   | 22.3346   |
| Eno1b     | 65.6508  | 144.842  | 515.801   | 106.109   | 362.688   | 367.995  | 426.772   | 445.349   |
| Eno2      | 2.55079  | 3.63129  | 0.787689  | 0.446655  | 0.410599  | 0.637918 | 1.87236   | 0.787853  |
| Enpp2     | 0.338233 | 0.40567  | 2.90232   | 4.49819   | 1.98488   | 2.45939  | 50.1195   | 77.3211   |
| Entpd3    | 20.3979  | 17.8584  | 6.31363   | 5.10085   | 8.9847    | 7.55974  | 0.369495  | 0.0454536 |
| Epb4.1l3  | 41.4954  | 41.4782  | 18.6396   | 22.5318   | 18.7715   | 18.7348  | 11.7047   | 5.77524   |
| Epb4.1l4b | 0.524742 | 0.479989 | 2.93339   | 5.75945   | 3.01682   | 3.67361  | 26.1091   | 32.6492   |
| Epha2     | 109.289  | 99.7447  | 27.7955   | 29.6214   | 46.9383   | 38.1051  | 2.64335   | 3.33122   |

|          |           |           |          |           |          |          |          |          |
|----------|-----------|-----------|----------|-----------|----------|----------|----------|----------|
| Ephx1    | 4.64021   | 4.65031   | 31.9077  | 34.3961   | 28.5016  | 30.5555  | 55.1455  | 73.5844  |
| Ereg     | 0         | 0         | 0.885578 | 0.820986  | 2.39274  | 1.65311  | 0        | 0.112856 |
| Esd      | 130.9     | 116.409   | 318.1    | 222.867   | 413.84   | 341.705  | 324.953  | 265.476  |
| Eva1a    | 1.14892   | 0.744949  | 13.2816  | 11.6891   | 10.0678  | 10.41    | 18.0574  | 17.8183  |
| Eva1c    | 1.32145   | 0.974652  | 4.66227  | 3.43758   | 6.64237  | 4.12893  | 12.1744  | 14.6947  |
| Eya2     | 7.90438   | 6.4326    | 21.2037  | 23.8071   | 16.9752  | 19.231   | 0.803378 | 1.13004  |
| F3       | 98.6345   | 95.8013   | 29.4784  | 34.5952   | 39.8176  | 34.8566  | 8.52841  | 13.7204  |
| Faah     | 1.22916   | 1.314     | 5.15084  | 6.14845   | 4.44464  | 5.3826   | 29.0704  | 22.0141  |
| Fabp3    | 1.57214   | 1.89486   | 7.09566  | 7.92381   | 3.80252  | 4.11094  | 207.193  | 338.938  |
| Fads3    | 51.3605   | 52.5262   | 16.166   | 16.6484   | 22.3079  | 20.4481  | 70.4358  | 55.0675  |
| Fam102b  | 11.6022   | 12.4643   | 5.0926   | 4.54883   | 5.38109  | 4.92643  | 3.33231  | 3.85723  |
| Fam111a  | 0.0269068 | 0         | 9.98085  | 11.8813   | 10.2702  | 10.2334  | 2.08183  | 2.56087  |
| Fam129a  | 4.48579   | 4.95203   | 14.075   | 27.8584   | 11.8668  | 15.9348  | 2.57409  | 4.43339  |
| Fam131a  | 4.34722   | 4.03599   | 2.38302  | 1.29962   | 1.22696  | 1.49536  | 1.84681  | 2.12934  |
| Fam131c  | 9.84213   | 8.84843   | 4.17047  | 4.65524   | 3.53293  | 3.10786  | 2.63136  | 3.92791  |
| Fam132a  | 2.30633   | 2.27173   | 14.74    | 7.79854   | 11.8415  | 10.7487  | 41.2852  | 32.622   |
| Fam13a   | 0.0494008 | 0.0743537 | 0.862714 | 1.92826   | 0.428469 | 0.875666 | 24.5312  | 19.5771  |
| Fam162a  | 95.1748   | 102.853   | 495.149  | 211.491   | 216.909  | 278.867  | 202.125  | 205.156  |
| Fam171a1 | 11.3216   | 11.1612   | 22.9783  | 32.3663   | 19.7284  | 22.0456  | 9.39436  | 11.4448  |
| Fam187b  | 1.24745   | 1.17467   | 3.54225  | 3.13375   | 4.96585  | 2.73683  | 8.79046  | 8.52898  |
| Fam189b  | 0.394976  | 0.39815   | 3.66537  | 5.19326   | 4.02087  | 4.29562  | 2.43454  | 2.47835  |
| Fam198b  | 6.60926   | 5.29709   | 0.773488 | 0.462885  | 1.07815  | 0.977744 | 0.488353 | 0.808878 |
| Fam20c   | 2.56243   | 2.49212   | 21.2183  | 30.8226   | 10.6689  | 17.9723  | 28.9561  | 39.0955  |
| Fam43a   | 0.252512  | 0.316763  | 1.84583  | 3.96473   | 2.71215  | 3.14254  | 8.76616  | 17.4584  |
| Fam65b   | 5.52819   | 5.01253   | 1.14797  | 0.663156  | 1.1425   | 1.05305  | 0.687874 | 0.297463 |
| Fam71f1  | 2.3542    | 2.10951   | 0.158877 | 0.0801587 | 0.464376 | 0.302814 | 0        | 0        |
| Fam71f2  | 2.31517   | 1.22398   | 0.675232 | 0.227057  | 0.201617 | 0.19014  | 0.240979 | 0.148072 |
| Fam96a   | 24.0643   | 28.3774   | 64.5689  | 45.7793   | 58.6407  | 54.3212  | 48.353   | 52.5497  |
| Fat1     | 25.9273   | 22.9378   | 9.2935   | 14.4365   | 10.7871  | 11.188   | 4.02698  | 5.99823  |

|         |          |          |           |           |           |           |          |           |
|---------|----------|----------|-----------|-----------|-----------|-----------|----------|-----------|
| Fcho1   | 7.39271  | 7.20915  | 3.45383   | 2.43164   | 2.47456   | 2.54318   | 1.07604  | 1.09756   |
| Fdx1l   | 21.8103  | 24.9833  | 57.2912   | 29.7745   | 65.4941   | 51.8134   | 75.6265  | 58.0933   |
| Fes     | 0.912059 | 1.16885  | 3.5823    | 4.401     | 2.84553   | 3.63341   | 5.42684  | 4.60349   |
| Fetub   | 0.697174 | 0.601582 | 4.1483    | 4.38801   | 3.72812   | 4.55715   | 6.84614  | 2.54414   |
| Fez2    | 68.7127  | 61.323   | 27.7897   | 18.0813   | 34.4646   | 29.0245   | 29.4788  | 32.8421   |
| Ffar4   | 0.233703 | 0.125729 | 8.87472   | 11.4091   | 7.24781   | 8.39357   | 0.594735 | 0.121845  |
| Fgd3    | 23.3839  | 21.0482  | 5.13423   | 7.08742   | 7.48967   | 6.75988   | 2.14483  | 3.90677   |
| Fgf1    | 0.326879 | 0.276754 | 6.56413   | 6.27878   | 6.37261   | 6.04901   | 86.5344  | 106.257   |
| Fgf18   | 0.716077 | 0.589828 | 2.94025   | 4.83276   | 6.47613   | 5.23128   | 0.531674 | 0.32682   |
| Fgf21   | 1.63217  | 2.43053  | 0.233658  | 0.196412  | 0.0653773 | 0.0617042 | 0        | 0         |
| Fgf7    | 0.130334 | 0.199277 | 1.62155   | 1.39369   | 3.93758   | 2.66182   | 0.387724 | 0.476894  |
| Fhdc1   | 9.49659  | 8.65199  | 2.37506   | 3.22549   | 2.95181   | 2.78592   | 1.05274  | 0.854888  |
| Fhl1    | 44.6865  | 43.4669  | 7.77483   | 4.48772   | 7.63863   | 6.72143   | 44.323   | 29.451    |
| Filip1l | 22.7605  | 23.9499  | 7.9497    | 8.94499   | 10.4012   | 9.11305   | 7.00145  | 10.8441   |
| Fjx1    | 2.70951  | 2.97448  | 0.319675  | 0.167986  | 0.626937  | 0.421698  | 1.7192   | 2.2466    |
| Fkbp5   | 16.3663  | 15.4685  | 30.726    | 40.4348   | 31.6973   | 32.3682   | 5.42031  | 5.8246    |
| Flnc    | 36.4915  | 29.958   | 6.94495   | 6.38203   | 8.15137   | 7.33168   | 0.053928 | 0.0829482 |
| Fmn1    | 4.60625  | 3.72421  | 1.08161   | 1.82929   | 1.052     | 1.22743   | 3.86374  | 4.14504   |
| Fn1     | 158.382  | 168.389  | 32.0826   | 39.1276   | 37.1207   | 36.227    | 9.34217  | 11.3051   |
| Fndc3c1 | 3.25535  | 2.62472  | 0.0484873 | 0.0652314 | 0.0761001 | 0.0818502 | 0        | 0         |
| Fos     | 60.5156  | 50.307   | 2.50931   | 3.58854   | 4.28335   | 3.81163   | 4.6635   | 1.86001   |
| Fosb    | 7.19701  | 6.26035  | 0.249789  | 0.462059  | 0.700005  | 0.448047  | 0.269042 | 0.165488  |
| Fosl1   | 40.7847  | 40.1526  | 9.86405   | 7.79948   | 27.2659   | 18.7478   | 3.12E-52 | 3.56E-31  |
| Foxa2   | 0.386364 | 0.343398 | 4.66124   | 3.3545    | 4.41746   | 4.13572   | 0        | 0         |
| Foxa3   | 5.23716  | 5.01078  | 1.54525   | 1.13679   | 1.2986    | 1.27413   | 0.259497 | 0.0797783 |
| Foxn1   | 2.00328  | 2.11977  | 0.509895  | 0.587964  | 0.686167  | 0.568772  | 0        | 0         |
| Foxn3   | 6.19553  | 6.47373  | 0.923446  | 2.40691   | 1.05563   | 1.18888   | 1.39094  | 1.4664    |
| Frmd6   | 21.3184  | 20.8895  | 5.87279   | 6.05876   | 7.8083    | 6.70366   | 2.10584  | 2.42475   |
| Frs3    | 4.19214  | 3.84714  | 1.85978   | 1.17756   | 1.31214   | 1.55086   | 16.9074  | 10.6239   |

|         |           |           |          |          |          |         |           |           |
|---------|-----------|-----------|----------|----------|----------|---------|-----------|-----------|
| Fsd1    | 9.43743   | 10.2212   | 1.45955  | 1.75644  | 1.50694  | 1.8729  | 0.30733   | 0.0944705 |
| Fst     | 29.1633   | 25.7958   | 4.80767  | 3.25475  | 8.5596   | 6.45746 | 7.0504    | 17.2046   |
| Fth1    | 748.374   | 672.607   | 1355.85  | 1754.95  | 1573.44  | 1563.52 | 6839.91   | 6204.69   |
| Ftl1    | 1417.86   | 1207.11   | 2696.98  | 2154.67  | 3246.22  | 2903.92 | 5582.4    | 3497.92   |
| Fuca1   | 14.12     | 14.0034   | 33.3034  | 26.5671  | 31.2672  | 29.0582 | 101.109   | 98.751    |
| Fuom    | 0.633564  | 0.77499   | 18.2949  | 19.0521  | 16.4036  | 18.3052 | 21.484    | 19.6525   |
| Fut2    | 0         | 0         | 1.19829  | 2.52986  | 0.58036  | 1.04669 | 0.0870598 | 0         |
| Fuz     | 3.22579   | 2.86478   | 7.91708  | 7.11088  | 6.09372  | 7.5625  | 32.2608   | 25.272    |
| Fxyd3   | 1.16279   | 1.97626   | 13.3603  | 8.82995  | 11.7328  | 9.33556 | 6.15512   | 1.25735   |
| Fzd8    | 0.166789  | 0.229336  | 1.10639  | 1.76511  | 1.41503  | 1.37696 | 4.88736   | 6.66969   |
| Gabarap | 144.161   | 161.565   | 372.864  | 274.042  | 324.326  | 320.836 | 598.656   | 497.361   |
| Gabrp   | 4.03559   | 2.94613   | 181.541  | 226.429  | 144.804  | 162.53  | 0.0779852 | 0         |
| Gadd45a | 59.5078   | 70.8234   | 26.607   | 19.4928  | 19.46    | 21.2665 | 31.3895   | 40.5704   |
| Gamt    | 0.792837  | 0.995927  | 5.51245  | 4.1408   | 4.26613  | 4.08844 | 50.4169   | 32.6966   |
| Gars    | 225.357   | 230.546   | 101.61   | 87.7032  | 111.98   | 106.267 | 42.9314   | 55.2194   |
| Gas1    | 0.0275256 | 0.0776902 | 0.791288 | 0.870032 | 1.26215  | 1.05976 | 10.0748   | 15.9194   |
| Gas2    | 2.88175   | 3.82395   | 11.4226  | 9.35302  | 12.6968  | 11.8616 | 30.6982   | 21.3778   |
| Gas6    | 4.42466   | 4.13161   | 1.48852  | 1.07945  | 1.45969  | 1.47263 | 224.403   | 220.239   |
| Gata6   | 2.19654   | 2.24403   | 0.670466 | 0.363294 | 0.701401 | 0.4402  | 0.721823  | 0.789262  |
| Gatad2b | 14.0278   | 13.5782   | 3.40632  | 9.94704  | 4.19531  | 5.24197 | 1.25716   | 1.54589   |
| Gatm    | 17.1885   | 16.1917   | 4.08304  | 3.29423  | 4.57564  | 4.67893 | 199.931   | 87.4189   |
| Gatsl2  | 7.54987   | 6.90089   | 2.29265  | 4.16158  | 2.45988  | 2.6784  | 15.958    | 7.50108   |
| Gbp2    | 0.8564    | 1.09124   | 9.0974   | 16.4925  | 6.03753  | 8.41351 | 7.21708   | 10.247    |
| Gbp3    | 0.318467  | 0.267139  | 7.07499  | 13.1575  | 6.72079  | 7.6596  | 35.0347   | 47.135    |
| Gbp7    | 0.629553  | 0.472304  | 2.65026  | 5.67556  | 2.17272  | 3.04944 | 5.35628   | 5.62927   |
| Gc      | 1.83858   | 3.13353   | 76.6918  | 53.4738  | 42.3304  | 53.1437 | 22.4471   | 13.8913   |
| Gclc    | 10.146    | 9.65108   | 38.6158  | 63.0998  | 49.0052  | 47.7361 | 172.464   | 172.583   |
| Gclm    | 35.8297   | 33.2948   | 60.7806  | 81.8192  | 75.0709  | 72.4113 | 105.951   | 111.714   |
| Gdf15   | 214.628   | 208.255   | 84.6412  | 61.6491  | 133.728  | 114.786 | 6.89566   | 9.45061   |

|          |           |           |             |          |          |          |           |           |
|----------|-----------|-----------|-------------|----------|----------|----------|-----------|-----------|
| Gdnf     | 1.59857   | 1.27429   | 0.0944331   | 0.147458 | 0.257068 | 0.241985 | 0.0726378 | 0.0893564 |
| Gemin7   | 37.9359   | 32.9596   | 80.1544     | 49.0438  | 90.5113  | 77.2425  | 89.897    | 85.0308   |
| Gfra4    | 0.13001   | 0.244807  | 3.92127     | 2.31687  | 0.9274   | 2.01435  | 2.70246   | 2.00511   |
| Ggt1     | 0         | 0.0829002 | 2.09556     | 5.34707  | 1.22865  | 2.88038  | 838.401   | 665.414   |
| Gimap9   | 0.302961  | 0.38031   | 2.31166     | 2.06879  | 2.12972  | 2.28311  | 10.9933   | 8.35363   |
| Gjb1     | 0.0923546 | 0.173883  | 1.73854     | 2.09212  | 0.763681 | 1.79936  | 35.2908   | 29.2228   |
| Gjb2     | 0.492742  | 0.326277  | 8.05426     | 11.1167  | 10.3381  | 9.45845  | 44.8335   | 47.1967   |
| Glipr2   | 32.8444   | 32.1761   | 15.2054     | 12.0043  | 15.178   | 14.1163  | 4.19684   | 3.06433   |
| Glod5    | 0.163457  | 0.0770759 | 2.45455     | 0.38202  | 1.42286  | 2.01823  | 138.023   | 101.86    |
| Glrp1    | 2.53358   | 4.16736   | 0.479886    | 0.233586 | 0.282998 | 0.319893 | 0         | 0         |
| Gltscr1l | 4.9242    | 4.58976   | 1.41816     | 2.65646  | 1.4798   | 1.83683  | 4.2767    | 4.30751   |
| Gm10052  | 997.604   | 940.979   | 421.928     | 534.834  | 439.232  | 448.108  | 24.2766   | 54.0801   |
| Gm1045   | 17.4627   | 26.2992   | 4.40636     | 3.3787   | 7.00354  | 5.63705  | 0         | 0.505051  |
| Gm10451  | 0         | 0         | 1.75907     | 3.32693  | 2.39026  | 2.5884   | 2.68174   | 2.88205   |
| Gm11538  | 0.482575  | 1.38412   | 3.78887     | 1.73172  | 3.58996  | 3.11331  | 0         | 0         |
| Gm12238  | 0         | 0         | 0           | 0        | 38.8447  | 0        | 0         | 0         |
| Gm12942  | 4.80788   | 3.77324   | 10.565      | 9.62823  | 7.85117  | 9.47837  | 16.7617   | 16.4473   |
| Gm13363  | 11.4461   | 12.2354   | 0.000516945 | 6.9341   | 3.19721  | 3.48323  | 2.26E-06  | 2.59E-06  |
| Gm14446  | 0.458608  | 0.356508  | 1.01878     | 3.21201  | 0.992516 | 1.46626  | 1.54158   | 2.18757   |
| Gm16617  | 1.51022   | 1.77992   | 0.0839469   | 0.423332 | 0.187743 | 0.177461 | 0.446203  | 0         |
| Gm16973  | 0.751274  | 0.910257  | 2.87608     | 2.26128  | 2.86842  | 2.89858  | 6.46202   | 4.55897   |
| Gm17296  | 3.56488   | 3.34545   | 0.902077    | 1.66405  | 0.980343 | 1.07797  | 0.744028  | 0.549242  |
| Gm4532   | 0.377554  | 0.284787  | 2.26657     | 1.34055  | 2.53453  | 2.0408   | 2.67722   | 1.64301   |
| Gm5424   | 1.69014   | 1.49846   | 17.8698     | 15.1868  | 13.1584  | 13.9616  | 444.328   | 309.595   |
| Gm5617   | 1.50744   | 1.42198   | 5.62561     | 4.23013  | 4.1917   | 4.27865  | 70.107    | 50.0653   |
| Gm6548   | 10.4033   | 10.2214   | 22.8043     | 22.6221  | 22.9025  | 22.0816  | 10.504    | 10.6846   |
| Gm8439   | 0.49801   | 0.470961  | 2.7904      | 3.75016  | 2.28069  | 3.15407  | 0         | 0         |
| Gnai1    | 0.768368  | 0.748257  | 2.78708     | 2.782    | 3.17405  | 2.8937   | 17.8911   | 18.7512   |
| Golm1    | 24.8242   | 25.5767   | 55.377      | 68.4513  | 56.143   | 57.6175  | 6.94602   | 8.98462   |

|        |          |           |          |          |          |          |          |           |
|--------|----------|-----------|----------|----------|----------|----------|----------|-----------|
| Got1   | 45.1277  | 42.9977   | 18.7241  | 18.1752  | 23.553   | 21.1751  | 49.6053  | 77.5169   |
| Gpc6   | 1.59047  | 1.68804   | 4.54724  | 5.45068  | 2.89794  | 3.7792   | 1.54826  | 2.06373   |
| Gpd1   | 0.748158 | 0.762591  | 17.5984  | 29.2889  | 18.5647  | 19.8802  | 120.01   | 82.5909   |
| Gpnmb  | 1.23527  | 2.19736   | 0.186203 | 0.219188 | 0.236556 | 0.301248 | 0.133705 | 0.0822426 |
| Gpr123 | 1.43822  | 1.77879   | 6.21086  | 9.94956  | 4.30083  | 5.85919  | 0.211465 | 0.487815  |
| Gpr124 | 20.6947  | 17.5529   | 2.51669  | 2.26475  | 2.61388  | 2.48642  | 8.11997  | 5.1069    |
| Gprc5a | 309.229  | 272.616   | 100.832  | 80.1861  | 131.204  | 115.088  | 7.6539   | 15.5305   |
| Gpt2   | 29.7553  | 31.7518   | 5.45604  | 5.51608  | 4.17056  | 4.79971  | 25.1317  | 19.2466   |
| Gpx1   | 176.687  | 150.747   | 470.322  | 309.454  | 590.509  | 503.497  | 1174.42  | 731.155   |
| Gpx2   | 0.1823   | 0.0858521 | 2.4761   | 2.37885  | 2.9417   | 3.41556  | 0        | 0         |
| Gpx3   | 2.81822  | 3.22353   | 18.1866  | 17.2926  | 8.60721  | 14.5232  | 22982.6  | 14189.8   |
| Grasp  | 18.1146  | 16.7146   | 7.43984  | 8.18928  | 8.03467  | 8.29136  | 5.9178   | 5.17496   |
| Grb10  | 0.221656 | 0.451736  | 2.31207  | 7.39654  | 3.50474  | 3.79686  | 8.7638   | 5.00118   |
| Grcc10 | 63.6907  | 70.1785   | 257.619  | 161.296  | 207.576  | 217.082  | 381.855  | 348.929   |
| Grem1  | 0.138899 | 0.261488  | 0.891844 | 0.723946 | 2.85948  | 1.68808  | 0        | 0         |
| Gsap   | 0.831935 | 0.975619  | 2.93533  | 3.63326  | 2.24535  | 2.79141  | 1.89962  | 1.12673   |
| Gsdma  | 3.12561  | 3.21095   | 0.705419 | 0.607939 | 1.34403  | 1.06076  | 0        | 0         |
| Gsr    | 104.202  | 94.9632   | 232.945  | 198.676  | 237.062  | 221.501  | 20.7432  | 28.1368   |
| Gsta1  | 0        | 0         | 0.394595 | 0.497523 | 2.7227   | 1.73706  | 3.15654  | 1.50755   |
| Gsta2  | 0        | 0         | 0.663484 | 1.28271  | 1.78169  | 1.75247  | 853.708  | 525.081   |
| Gsta3  | 1.1762   | 0.704744  | 13.7848  | 13.9437  | 21.7847  | 18.1019  | 38.405   | 27.2265   |
| Gsta4  | 5.60648  | 5.03726   | 50.1617  | 35.8726  | 75.9955  | 59.6165  | 488.452  | 283.01    |
| Gstm2  | 20.4192  | 17.3888   | 76.0435  | 69.8346  | 51.9676  | 58.583   | 311.778  | 346.221   |
| Gstm4  | 0.992345 | 1.0702    | 3.04141  | 4.09665  | 3.59965  | 3.6898   | 9.74863  | 14.0472   |
| Gstt1  | 0.707392 | 0.488629  | 7.37383  | 10.9465  | 4.50778  | 6.5728   | 346.684  | 277.896   |
| Gstt2  | 0.476396 | 0.384449  | 8.44285  | 10.1715  | 8.10507  | 8.59542  | 180.02   | 124.3     |
| Gstt3  | 1.55699  | 1.9388    | 12.3265  | 15.5787  | 8.31619  | 9.68088  | 44.5682  | 47.0117   |
| Gtf3c6 | 24.1017  | 26.328    | 61.1415  | 39.3326  | 67.9038  | 59.3363  | 59.886   | 63.5901   |
| H1f0   | 303.216  | 347.996   | 188.973  | 140.809  | 111.775  | 138.354  | 120.053  | 165.312   |



|           |             |             |          |          |          |             |          |            |
|-----------|-------------|-------------|----------|----------|----------|-------------|----------|------------|
| H1fx      | 6.96642     | 8.54729     | 22.4109  | 15.1655  | 12.9141  | 16.7988     | 3.26105  | 2.00341    |
| H2-Q5     | 0.444568    | 0.190296    | 1.38853  | 2.78642  | 1.15353  | 1.56083     | 1.91831  | 1.91543    |
| H2-Q7     | 0.94918     | 0.867978    | 5.46642  | 8.93547  | 3.24988  | 5.11139     | 17.4085  | 17.189     |
| H2-Q8     | 0.000370546 | 0.000339647 | 2.04729  | 5.03143  | 1.50888  | 0.000409078 | 5.18144  | 0.00133302 |
| H2-T23    | 10.1122     | 10.8621     | 43.0341  | 39.2954  | 30.1715  | 35.4412     | 121.962  | 125.746    |
| H2afx     | 28.4026     | 30.8801     | 85.9375  | 76.4049  | 84.0625  | 80.8913     | 14.6816  | 14.0361    |
| H6pd      | 22.0861     | 20.5571     | 48.1324  | 83.7576  | 45.5975  | 55.6434     | 32.0841  | 35.7445    |
| HaplIn4   | 1.57905     | 1.86815     | 0.145469 | 0.16679  | 0.177884 | 0.15349     | 0        | 0.0437999  |
| Havcr1    | 0.553062    | 0.565584    | 3.05738  | 4.09997  | 5.7496   | 5.02301     | 1.28527  | 1.05362    |
| Hbegf     | 83.9454     | 80.8352     | 24.0726  | 22.2689  | 37.8411  | 31.297      | 2.74958  | 6.6957     |
| Hddc3     | 1.77986     | 1.95675     | 6.19105  | 6.20047  | 6.04292  | 6.47133     | 11.5907  | 13.1562    |
| Heg1      | 2.1647      | 2.08611     | 0.478479 | 0.607585 | 0.678714 | 0.700565    | 1.57842  | 1.5212     |
| Herc3     | 5.84311     | 5.63928     | 2.23159  | 1.79336  | 2.28034  | 2.47946     | 7.44836  | 6.80738    |
| Hexa      | 7.65329     | 8.99243     | 24.903   | 24.7888  | 16.9201  | 21.7869     | 39.3421  | 42.3077    |
| Hfe       | 0.97274     | 0.940325    | 3.20105  | 2.91144  | 2.54294  | 2.39593     | 9.84301  | 14.8879    |
| Hgfac     | 11.8568     | 10.7808     | 32.9588  | 21.4502  | 18.3089  | 22.344      | 25.2162  | 16.8936    |
| Hif3a     | 0.0180257   | 0.0226956   | 2.08755  | 3.71251  | 0.807574 | 1.67459     | 0.107775 | 0.0663055  |
| Higd1a    | 15.0429     | 16.1416     | 55.5885  | 27.48    | 37.7199  | 41.4935     | 37.7335  | 37.6444    |
| Hilpda    | 75.6767     | 73.4028     | 28.7231  | 9.35853  | 20.0002  | 21.2253     | 4.20588  | 4.38444    |
| Hint3     | 3.19678     | 3.74962     | 14.3922  | 7.65116  | 9.20939  | 8.52316     | 41.4545  | 19.7854    |
| Hip1      | 16.4162     | 15.2358     | 4.88853  | 5.89257  | 4.79839  | 4.97186     | 4.5773   | 4.64172    |
| Hist1h2af | 0.415209    | 0.392332    | 2.78513  | 1.94989  | 3.10712  | 2.12986     | 0        | 0          |
| Hist1h2bc | 2.64478     | 3.46319     | 27.4322  | 10.9102  | 28.9485  | 26.8385     | 259.691  | 270.766    |
| Hist3h2a  | 2.6806      | 3.10688     | 9.52138  | 9.82866  | 15.0318  | 12.6682     | 37.2416  | 45.1984    |
| Hkdc1     | 0.0983898   | 0.0809924   | 1.15571  | 1.25754  | 0.929673 | 1.04729     | 0.878493 | 0.6304     |
| Hmgn2     | 82.0744     | 89.1338     | 262.044  | 233.106  | 239.348  | 246.048     | 44.73    | 39.0324    |
| Hmox2     | 44.9626     | 44.2984     | 117.523  | 109.673  | 95.9295  | 107.97      | 71.1526  | 74.2473    |
| Hoxb13    | 9.07574     | 8.34341     | 22.3251  | 15.0747  | 17.1559  | 19.0996     | 0        | 0          |
| Hoxb2     | 12.3351     | 13.1643     | 28.2402  | 28.949   | 31.4973  | 30.2027     | 20.4417  | 30.2407    |

|               |           |            |          |          |          |         |          |          |
|---------------|-----------|------------|----------|----------|----------|---------|----------|----------|
| Hoxb6         | 21.1998   | 22.6975    | 77.7984  | 52.0329  | 71.603   | 69.2041 | 69.661   | 86.1407  |
| Hoxb7         | 23.0436   | 22.8177    | 56.0041  | 47.0469  | 51.0033  | 54.2197 | 20.5158  | 33.6203  |
| Hoxb8         | 6.48908   | 6.8185     | 18.9612  | 21.3944  | 19.7399  | 20.605  | 42.4289  | 52.7891  |
| Hoxd9         | 6.46588   | 8.07334    | 15.7336  | 18.3584  | 14.8271  | 16.3833 | 45.1079  | 39.2479  |
| Hp            | 0.0347548 | 0.0327222  | 0.731472 | 1.65064  | 0.517401 | 1.13811 | 0.206339 | 0.38044  |
| Hpcal4        | 5.0166    | 4.17184    | 1.15509  | 1.05569  | 1.48633  | 1.01733 | 0.270582 | 0.366188 |
| Hras          | 26.0487   | 24.6571    | 57.2131  | 40.293   | 73.178   | 64.4544 | 52.9537  | 52.6375  |
| Hs3st1        | 21.7358   | 18.4816    | 50.3869  | 54.82    | 68.1719  | 59.324  | 1.76058  | 3.64056  |
| Hs3st6        | 0.116725  | 0.219829   | 7.41583  | 8.77148  | 5.26249  | 6.28262 | 1.8471   | 2.27007  |
| Hs6st2        | 0.0294938 | 0.00924601 | 1.40704  | 1.53508  | 1.63245  | 1.70847 | 1.58066  | 2.26877  |
| Hsh2d         | 0.0387232 | 0.218782   | 1.41601  | 1.87578  | 0.528546 | 1.35926 | 0        | 0        |
| Hspb2         | 12.0395   | 11.533     | 5.68018  | 2.86607  | 4.39703  | 3.67426 | 7.48932  | 9.27226  |
| Hspb8         | 0.0496914 | 0.0701536  | 1.4024   | 1.52584  | 1.07829  | 1.01585 | 7.97462  | 5.35679  |
| Htra1         | 51.6296   | 50.5801    | 13.7382  | 8.668    | 18.9108  | 14.6525 | 31.3991  | 24.1728  |
| Hypk          | 138.099   | 140.656    | 308.315  | 198.333  | 331.677  | 292.728 | 354.384  | 307.699  |
| I830012O16Rik | 1.72614   | 1.6453     | 5.87676  | 11.7348  | 5.81665  | 6.56434 | 6.05259  | 16.9895  |
| lapp          | 0.07812   | 0.147327   | 1.30301  | 0.876107 | 1.16553  | 1.28554 | 0        | 0        |
| lars          | 62.0084   | 62.8642    | 21.8722  | 33.485   | 27.3737  | 26.5051 | 8.43695  | 11.5802  |
| lcam1         | 5.36888   | 4.92225    | 10.5628  | 17.282   | 8.57438  | 11.2472 | 14.6391  | 17.2498  |
| lct1          | 41.0636   | 42.2767    | 96.3685  | 55.5368  | 102.082  | 89.302  | 103.536  | 106.526  |
| ld1           | 19.9211   | 17.4062    | 78.67    | 58.7373  | 100.679  | 81.5334 | 45.6831  | 28.4472  |
| ler2          | 115.149   | 118.856    | 39.5474  | 29.2011  | 45.6097  | 39.6314 | 17.2165  | 14.2206  |
| ler3          | 314.791   | 287.652    | 130.585  | 77.8902  | 154.248  | 134.214 | 28.4568  | 22.6634  |
| lfi204        | 1.4007    | 1.15556    | 7.8109   | 10.2613  | 9.34769  | 9.34082 | 2.16832  | 2.03513  |
| lfi205        | 0.593917  | 0.692165   | 4.50869  | 4.42234  | 4.98064  | 4.62721 | 0.336069 | 0.413183 |
| lfi27         | 1.99236   | 2.72768    | 138.664  | 157.222  | 115.554  | 129.741 | 75.1901  | 83.1773  |
| lfi27l2a      | 0         | 0.132586   | 15.6886  | 16.4092  | 14.7922  | 14.6193 | 72.4225  | 87.6862  |
| lfi35         | 17.638    | 17.6724    | 60.0939  | 56.9437  | 63.8131  | 62.3227 | 26.6899  | 21.4122  |
| lfi44         | 0.0893123 | 0.0840305  | 18.4845  | 36.8407  | 12.7478  | 19.1405 | 11.8695  | 14.8179  |

|         |          |           |          |          |          |          |          |          |
|---------|----------|-----------|----------|----------|----------|----------|----------|----------|
| lfi47   | 0.681339 | 0.369978  | 5.16316  | 7.60872  | 3.34715  | 4.74576  | 6.07369  | 6.04306  |
| lfi48   | 1.75881  | 1.81194   | 4.47619  | 8.21372  | 4.49012  | 5.05976  | 2.89087  | 2.98489  |
| lfit1   | 0.660661 | 0.979061  | 7.48916  | 19.9962  | 9.21221  | 9.52226  | 9.5318   | 6.04323  |
| lfit3   | 4.17234  | 4.30458   | 14.6401  | 27.3368  | 15.2146  | 17.6145  | 35.2868  | 67.6179  |
| lfitm1  | 0.243214 | 0         | 12.6848  | 20.818   | 6.13344  | 10.6903  | 45.2071  | 92.6063  |
| lfitm2  | 172.777  | 167.819   | 454.157  | 363.098  | 377.019  | 372.466  | 378.982  | 356.662  |
| lfitm3  | 29.1947  | 33.5301   | 694.249  | 724.951  | 657.471  | 667.651  | 189.541  | 198.98   |
| lfne    | 0        | 0         | 0.924045 | 1.5532   | 0.723094 | 0.879216 | 0        | 0        |
| lfng2   | 20.3485  | 19.6949   | 47.1654  | 49.1794  | 50.9073  | 49.9795  | 7.65792  | 10.2806  |
| lft22   | 16.5668  | 16.8579   | 42.3458  | 32.762   | 37.9247  | 37.1595  | 26.4936  | 25.3101  |
| lgf2bp1 | 6.72895  | 5.8904    | 2.26259  | 2.23417  | 2.53072  | 2.13838  | 0.324958 | 0.327155 |
| lgfbp3  | 1.34579  | 1.46896   | 7.00611  | 4.17183  | 14.0572  | 9.55098  | 84.6454  | 82.8387  |
| lgfbp4  | 42.0952  | 38.0563   | 219.143  | 259.864  | 161.872  | 200.015  | 294.684  | 133.222  |
| lgtp    | 4.18196  | 4.43276   | 17.4373  | 25.3899  | 14.5447  | 19.4577  | 14.3955  | 12.4723  |
| ligp1   | 0        | 0.0276838 | 1.12258  | 3.29372  | 1.13055  | 1.51075  | 6.12885  | 5.60026  |
| ll10rb  | 11.8255  | 13.2095   | 27.3031  | 26.5023  | 28.0012  | 28.2226  | 48.6423  | 49.3406  |
| ll11    | 6.323    | 8.69907   | 0.610635 | 0.317254 | 1.02905  | 0.825501 | 0        | 0.267004 |
| ll13ra1 | 6.12011  | 7.06604   | 33.7123  | 35.4781  | 21.516   | 25.7959  | 15.1113  | 17.0194  |
| ll17re  | 3.49046  | 3.30629   | 8.38366  | 10.9731  | 6.03784  | 7.2254   | 19.1015  | 20.5496  |
| ll1f6   | 0.114807 | 0.108179  | 0.764575 | 0.749795 | 2.56667  | 1.27892  | 0        | 0        |
| ll1rl1  | 0.31335  | 0.624819  | 1.21084  | 2.41144  | 2.05763  | 1.82047  | 0.148472 | 0.152225 |
| ll1rn   | 3.42991  | 4.39795   | 8.66846  | 12.9239  | 12.7765  | 10.9733  | 0.108274 | 0        |
| ll23a   | 23.1136  | 32.8202   | 7.18999  | 3.96576  | 11.8872  | 8.0329   | 0.407822 | 0.626613 |
| ll24    | 53.098   | 49.8448   | 9.53087  | 6.4419   | 21.0734  | 13.8584  | 0        | 0        |
| ll33    | 2.63489  | 2.34808   | 7.31585  | 10.2041  | 10.3175  | 8.67787  | 3.38528  | 4.16377  |
| llk     | 119.489  | 108.297   | 42.7116  | 70.0404  | 55.2837  | 53.5222  | 75.0761  | 75.3691  |
| lmp1l   | 13.132   | 14.4826   | 38.5036  | 21.869   | 32.7411  | 30.1677  | 38.5955  | 31.4811  |
| lnhba   | 22.8267  | 20.9792   | 3.02635  | 5.53596  | 6.77999  | 4.49378  | 0        | 0.10967  |
| lnmt    | 0        | 0.0451546 | 2.81763  | 3.03891  | 1.66629  | 2.75133  | 39.4995  | 28.8032  |

|         |           |           |          |          |          |          |          |          |
|---------|-----------|-----------|----------|----------|----------|----------|----------|----------|
| Insl3   | 0.867383  | 0.480374  | 3.91924  | 1.21E-07 | 3.73773  | 2.79388  | 10.7067  | 2.54541  |
| lqgap3  | 25.0893   | 22.9593   | 9.76747  | 13.9722  | 9.84171  | 11.5034  | 0.176213 | 0.162606 |
| lqsec1  | 10.1371   | 8.72632   | 3.96479  | 5.46625  | 3.14478  | 3.91325  | 19.1515  | 22.6227  |
| lrf7    | 1.03923   | 1.53392   | 34.1019  | 66.8547  | 29.315   | 42.0795  | 18.702   | 19.0547  |
| lrf8    | 10.5385   | 9.09273   | 3.07033  | 2.35332  | 1.82515  | 2.20172  | 5.93306  | 6.5119   |
| lrf9    | 4.27715   | 4.61096   | 23.8468  | 34.6882  | 23.0999  | 23.975   | 15.0753  | 14.205   |
| lrgm1   | 17.6624   | 19.6614   | 66.0957  | 94.2539  | 70.4785  | 73.0878  | 22.0461  | 23.1258  |
| lrgm2   | 1.4256    | 1.7309    | 7.9609   | 16.0149  | 7.14183  | 8.92579  | 4.93199  | 6.20099  |
| lrs2    | 3.40374   | 2.64336   | 0.175811 | 0.354782 | 0.144526 | 0.210231 | 1.01007  | 1.66978  |
| lrx3    | 0.130978  | 0.264077  | 1.38673  | 2.19264  | 1.55402  | 1.98768  | 28.0278  | 34.9679  |
| lsg15   | 6.78333   | 9.88845   | 157.82   | 191.495  | 176.69   | 173.522  | 19.4344  | 18.5284  |
| lsg20   | 15.7293   | 14.1874   | 62.8984  | 64.3911  | 46.533   | 57.3572  | 16.8363  | 10.3878  |
| lsoc2a  | 0.846956  | 1.0496    | 2.86643  | 3.32364  | 3.65172  | 3.28815  | 178.965  | 124.568  |
| lsoc2b  | 2.14684   | 3.39878   | 10.4332  | 7.49324  | 4.08229  | 7.54188  | 34.9389  | 34.776   |
| ltga2   | 28.4391   | 29.7821   | 6.24008  | 20.2671  | 7.89295  | 9.98721  | 0.119835 | 0        |
| ltgb6   | 2.14379   | 1.89167   | 6.81335  | 8.76095  | 6.10941  | 6.77672  | 21.9546  | 25.0068  |
| ltm2a   | 7.06204   | 6.09567   | 1.11245  | 0.70145  | 0.900046 | 1.23954  | 2.48778  | 5.60753  |
| ltm2b   | 95.6055   | 103.936   | 301.159  | 272.962  | 247.874  | 263.196  | 1485.79  | 1505.48  |
| ltprrip | 16.1789   | 15.1242   | 4.15805  | 4.92833  | 5.09619  | 5.08762  | 3.43982  | 4.10721  |
| lzum04  | 1.11869   | 1.2547    | 4.55115  | 2.83199  | 2.64598  | 3.6837   | 22.7227  | 13.762   |
| Jag1    | 29.7398   | 36.9915   | 13.9508  | 14.3679  | 18.4177  | 16.7253  | 7.5642   | 8.2415   |
| Jag2    | 9.0518    | 7.80475   | 3.86071  | 3.61661  | 3.665    | 3.79208  | 3.68438  | 2.38157  |
| Jdp2    | 40.752    | 40.9105   | 5.27054  | 7.4956   | 5.57561  | 6.13043  | 6.8077   | 15.7341  |
| Josd2   | 5.91727   | 7.02939   | 21.2089  | 20.2364  | 26.2106  | 23.1523  | 35.5503  | 26.1098  |
| Jun     | 33.5514   | 31.8706   | 10.3791  | 11.2632  | 11.0811  | 11.3143  | 13.3445  | 10.5314  |
| Junb    | 331.685   | 375.675   | 99.0555  | 92.077   | 119.22   | 108.89   | 16.5532  | 16.6047  |
| Katnal1 | 4.40087   | 4.47852   | 1.38296  | 2.12347  | 1.34826  | 1.52245  | 4.61863  | 4.56117  |
| Kbtbd11 | 0.0897972 | 0.0675682 | 3.80997  | 3.65966  | 0.978922 | 2.10041  | 5.59869  | 3.72963  |
| Kcnab3  | 9.12793   | 8.88051   | 2.40007  | 1.31327  | 1.79318  | 2.29156  | 1.43441  | 1.00814  |

|           |           |           |          |          |          |          |          |          |
|-----------|-----------|-----------|----------|----------|----------|----------|----------|----------|
| Kcne3     | 0         | 0.0894591 | 2.68758  | 2.2689   | 3.59338  | 2.38561  | 2.84739  | 0.512788 |
| Kcnj16    | 0.0353961 | 0.0110927 | 1.31783  | 2.94355  | 1.63808  | 2.12012  | 104.841  | 129.309  |
| Kctd1     | 4.11437   | 3.49828   | 22.1766  | 28.9919  | 21.4344  | 23.137   | 14.8416  | 19.63    |
| Kctd15    | 0.654641  | 0.752886  | 2.474    | 2.79037  | 2.88522  | 3.26888  | 5.08392  | 6.38575  |
| Keg1      | 0         | 0         | 2.29485  | 3.04635  | 1.15012  | 1.62556  | 964.725  | 792.348  |
| Kif12     | 0.744934  | 0.793232  | 7.65522  | 5.15999  | 7.48488  | 6.56849  | 131.514  | 74.7049  |
| Kif5c     | 4.89623   | 4.70287   | 0.404735 | 0.283599 | 0.499156 | 0.384285 | 0.472759 | 0.872548 |
| Kif7      | 2.89071   | 2.37563   | 1.01317  | 0.417225 | 0.706922 | 0.730761 | 0.946804 | 0.342601 |
| Kifc2     | 2.78255   | 2.74685   | 1.10635  | 0.739084 | 0.747432 | 0.991499 | 16.5604  | 11.0384  |
| Kifc3     | 15.1937   | 14.9463   | 3.37477  | 3.58387  | 3.05016  | 3.22669  | 41.5456  | 57.0037  |
| Kirrel    | 13.8321   | 14.8387   | 5.19187  | 7.38948  | 6.20161  | 6.10979  | 1.77228  | 1.80365  |
| Kitl      | 2.53001   | 2.50314   | 5.46387  | 7.4898   | 6.80408  | 6.46592  | 5.88013  | 4.91733  |
| Klc1      | 66.7008   | 61.5298   | 26.8316  | 24.8096  | 29.8532  | 28.2124  | 30.1674  | 23.3011  |
| Klf11     | 7.73744   | 8.07302   | 3.42582  | 2.8507   | 2.39686  | 3.00385  | 2.54505  | 3.91375  |
| Klf2      | 7.28684   | 7.97801   | 1.28925  | 0.530434 | 1.19859  | 1.04233  | 28.2853  | 20.7412  |
| Klf3      | 26.1297   | 24.6238   | 8.1832   | 15.8122  | 9.14674  | 9.52411  | 6.56045  | 6.53824  |
| Klf5      | 31.5398   | 29.2912   | 7.89998  | 18.9731  | 10.0219  | 11.8031  | 0.311874 | 2.87598  |
| Klf6      | 110.211   | 108.742   | 23.776   | 23.8551  | 33.9743  | 27.1165  | 7.91107  | 10.9124  |
| Klf7      | 4.51809   | 4.45176   | 0.96994  | 2.96813  | 1.26009  | 1.7614   | 0.415862 | 0.638951 |
| Klhdc7a   | 1.05323   | 1.33438   | 6.20717  | 11.0043  | 3.47952  | 5.78011  | 20.142   | 18.4556  |
| Klhl14    | 0.042348  | 0.0597563 | 2.89736  | 5.26205  | 2.14658  | 2.98803  | 3.99217  | 5.44467  |
| Klhl5     | 14.6729   | 13.7804   | 5.74575  | 5.46276  | 5.31763  | 5.47549  | 13.8571  | 12.7156  |
| Klra33    | 9.63273   | 6.46659   | 0.862634 | 1.58147  | 2.6723   | 1.59931  | 0        | 0        |
| Kng1      | 0         | 0         | 0.501878 | 5.82837  | 0.529988 | 1.26604  | 0.627594 | 1.40841  |
| Kng2      | 0         | 0         | 0.689307 | 3.68864  | 0.807284 | 0.918396 | 464.406  | 530.966  |
| Krt15     | 0.131621  | 0.0743323 | 1.63174  | 1.56785  | 1.6322   | 1.7839   | 5.63183  | 2.01967  |
| Krt80     | 20.8574   | 17.3568   | 2.33666  | 3.52669  | 3.75336  | 2.85272  | 6.19819  | 8.17883  |
| L3hypdh   | 4.70505   | 5.00409   | 1.94201  | 1.3606   | 1.68118  | 1.55296  | 26.0647  | 26.0263  |
| LOC106740 | 6.05579   | 8.05213   | 3.94935  | 1.78449  | 3.64772  | 2.76318  | 7.65783  | 4.86699  |

|          |          |          |          |           |          |           |           |          |
|----------|----------|----------|----------|-----------|----------|-----------|-----------|----------|
| Lage3    | 29.6568  | 30.8372  | 82.4967  | 51.5665   | 78.4607  | 78.0489   | 37.3735   | 44.1174  |
| Lamb1    | 99.4384  | 102.337  | 41.1589  | 40.0398   | 42.6716  | 42.5847   | 35.8127   | 47.4159  |
| Lamp2    | 40.4995  | 45.603   | 81.7336  | 130.738   | 65.8097  | 81.1694   | 200.159   | 173.27   |
| Lamtor1  | 53.8487  | 58.0941  | 125.64   | 87.4119   | 131.301  | 122.128   | 73.253    | 80.7862  |
| Lamtor4  | 25.7627  | 25.585   | 77.1134  | 47.6962   | 78.3783  | 74.3397   | 187.853   | 148.827  |
| Lars2    | 38.0616  | 49.4898  | 102.252  | 124.607   | 143.243  | 122.689   | 19.4112   | 20.8649  |
| Lats2    | 14.8816  | 14.7874  | 3.34685  | 4.3192    | 4.62606  | 4.6534    | 11.4188   | 12.8221  |
| Layn     | 6.21063  | 6.46327  | 2.01186  | 2.02035   | 2.47315  | 2.12356   | 1.20043   | 1.66054  |
| Lbp      | 0.380829 | 0.407202 | 6.87326  | 10.4472   | 3.9909   | 6.36432   | 2.67747   | 2.59651  |
| Lca5     | 6.5567   | 6.69908  | 2.02645  | 3.80314   | 1.96187  | 2.25553   | 0.895005  | 0.917574 |
| Lcn2     | 6.47354  | 10.3932  | 827.685  | 960.514   | 482.104  | 675.225   | 6.38695   | 8.93304  |
| Ldhb     | 80.8489  | 79.1812  | 596.617  | 747.85    | 601.632  | 621.192   | 1130.6    | 1352.37  |
| Ldhd     | 0.417507 | 0.411593 | 3.56302  | 6.00987   | 2.80967  | 3.55139   | 59.5922   | 75.8328  |
| Ldlrad3  | 4.07422  | 3.85302  | 0.46979  | 0.465908  | 0.796363 | 0.571938  | 7.00392   | 7.18232  |
| Lef1     | 1.54418  | 1.58497  | 0.105736 | 0.053085  | 0.268746 | 0.0848206 | 0.681526  | 0.978236 |
| Lgals3   | 78.174   | 83.2495  | 181.23   | 119.03    | 183.657  | 169.54    | 104.631   | 83.8074  |
| Lgals3bp | 0.653111 | 0.653019 | 52.8814  | 125.315   | 55.6391  | 68.2972   | 42.7236   | 50.1534  |
| Lgals9   | 13.3289  | 11.9158  | 48.4425  | 90.5682   | 52.295   | 58.5349   | 25.1077   | 24.1071  |
| Lgr4     | 2.77361  | 2.46012  | 6.71035  | 10.9208   | 4.79852  | 6.73975   | 32.142    | 26.3941  |
| Lhfp     | 83.4342  | 78.6775  | 23.9361  | 19.5118   | 24.9242  | 23.7734   | 18.9553   | 25.3309  |
| Lhx9     | 2.49479  | 2.48315  | 0.109601 | 0.0608382 | 0.158577 | 0.207448  | 0         | 0        |
| Lipg     | 9.56304  | 7.9579   | 2.15409  | 2.51264   | 2.624    | 3.23187   | 0.201168  | 0.659941 |
| Lmbrd2   | 8.99803  | 8.31903  | 2.3032   | 5.54613   | 2.12491  | 3.20739   | 2.36121   | 1.55597  |
| Lmo7     | 14.1922  | 11.7031  | 3.63241  | 6.24884   | 4.91415  | 4.81621   | 18.9665   | 25.2476  |
| Loxl4    | 12.9421  | 11.2133  | 1.31669  | 2.7026    | 2.11777  | 2.14684   | 3.31668   | 3.51395  |
| Lpar6    | 3.05137  | 2.95467  | 9.98762  | 10.7566   | 9.9615   | 9.54604   | 8.65374   | 6.03559  |
| Lpcat1   | 34.6682  | 30.9737  | 13.5389  | 16.1738   | 15.0608  | 15.7875   | 1.52074   | 1.97354  |
| Lpcat2   | 11.5922  | 10.3528  | 5.08993  | 3.31416   | 5.87755  | 4.39454   | 1.01436   | 0.623842 |
| Lrch2    | 3.57069  | 4.18227  | 0.562037 | 0.318709  | 0.395585 | 0.455112  | 0.0703828 | 0.129875 |

|         |           |           |          |          |          |          |           |           |
|---------|-----------|-----------|----------|----------|----------|----------|-----------|-----------|
| Lrfn1   | 2.80417   | 2.64626   | 0.883105 | 0.718897 | 0.690714 | 0.682195 | 0.904172  | 0.679615  |
| Lrg1    | 0.0690379 | 0.0324999 | 2.17948  | 3.40739  | 0.513884 | 1.61479  | 3.27911   | 1.25957   |
| Lrp1    | 2.87584   | 2.88926   | 0.534532 | 0.426352 | 0.339077 | 0.383427 | 5.04232   | 4.80582   |
| Lrp12   | 10.0329   | 10.8946   | 3.01818  | 3.899    | 3.90187  | 3.46509  | 1.05887   | 2.14557   |
| Lrrc26  | 0.118194  | 0.0371    | 1.39711  | 0.734068 | 0.635551 | 1.47526  | 2.10402   | 1.86751   |
| Lrrc8b  | 20.7985   | 17.7885   | 4.10038  | 9.47732  | 5.23867  | 6.48139  | 1.18039   | 1.11686   |
| Lrrc8c  | 40.9573   | 38.6655   | 10.3228  | 11.5867  | 15.1032  | 11.8767  | 2.09781   | 1.85113   |
| Lrrk2   | 4.86978   | 4.88904   | 0.686482 | 0.680473 | 1.00749  | 0.818402 | 7.16262   | 8.18392   |
| Lsm7    | 71.0007   | 64.2117   | 201.458  | 95.2844  | 205.415  | 184.643  | 56.0266   | 57.6795   |
| Lsp1    | 4.53115   | 4.35944   | 1.392    | 0.486854 | 0.746981 | 1.16964  | 13.3019   | 10.762    |
| Ltb     | 1.32568   | 1.12371   | 10.8758  | 11.8608  | 12.1761  | 11.4857  | 1.04826   | 0.322017  |
| Ltbp2   | 3.83069   | 4.81742   | 1.049    | 0.839137 | 1.17165  | 0.994288 | 0.0754115 | 0.115985  |
| Ltf     | 0         | 0.0149109 | 1.80512  | 2.53447  | 2.18024  | 2.31172  | 0.471468  | 0.405935  |
| Lurap1l | 5.09718   | 4.84796   | 13.4704  | 13.7838  | 17.7716  | 16.0274  | 9.19807   | 9.84687   |
| Ly6c1   | 45.8723   | 44.2489   | 7.16272  | 5.70868  | 6.68072  | 5.4338   | 152.409   | 168.953   |
| Ly6g6d  | 0.472167  | 0.356389  | 2.73417  | 1.94423  | 1.52761  | 1.0009   | 6.12486   | 11.269    |
| Ly75    | 9.04632   | 9.505     | 2.78952  | 4.9256   | 2.79439  | 3.31328  | 0.193965  | 0.0298305 |
| Ly96    | 2.66823   | 3.10486   | 8.66369  | 7.81347  | 10.8614  | 8.93886  | 14.5437   | 12.693    |
| Lypd6b  | 0.732583  | 0.598659  | 4.43581  | 4.41087  | 3.68033  | 3.62353  | 4.24248   | 5.64068   |
| Lym2    | 9.68159   | 10.8723   | 27.0657  | 18.754   | 23.9351  | 20.2587  | 37.412    | 37.6359   |
| Lysmd2  | 1.90401   | 1.79297   | 6.98944  | 5.46929  | 8.90933  | 8.40162  | 1.64758   | 2.60332   |
| Mab21l3 | 1.50327   | 1.36897   | 7.61797  | 12.9783  | 4.32174  | 7.12622  | 1.21699   | 0.704519  |
| Mafb    | 3.11395   | 2.69139   | 0.643749 | 0.423603 | 0.894127 | 0.679258 | 7.83589   | 6.07089   |
| Maff    | 54.9889   | 60.9426   | 25.9008  | 20.5882  | 28.0254  | 24.9703  | 1.33888   | 2.28652   |
| Mageh1  | 0.432247  | 0.594769  | 3.46169  | 3.59137  | 3.25848  | 2.41055  | 5.72571   | 8.37311   |
| Mal2    | 29.9944   | 32.0931   | 62.8091  | 73.9188  | 54.2018  | 58.8112  | 33.7951   | 49.5843   |
| Mansc1  | 1.25676   | 1.18259   | 4.53839  | 5.74087  | 3.59682  | 4.14226  | 7.80526   | 9.19397   |
| Maoa    | 10.9116   | 10.7063   | 3.65547  | 2.70363  | 5.91902  | 4.42823  | 4.0718    | 4.18691   |
| Map1b   | 10.7089   | 10.0355   | 2.93723  | 4.62238  | 4.54958  | 4.05279  | 0.747526  | 1.21371   |

|          |          |           |          |           |          |           |          |          |
|----------|----------|-----------|----------|-----------|----------|-----------|----------|----------|
| Map3k5   | 1.71549  | 1.87769   | 7.22116  | 10.6365   | 6.83012  | 7.11845   | 10.7276  | 11.2847  |
| Mapk15   | 0        | 0         | 1.43619  | 1.33686   | 1.55171  | 1.40757   | 23.8361  | 20.8394  |
| Mapk8ip3 | 14.4565  | 12.4194   | 5.59037  | 4.39478   | 4.78643  | 4.84379   | 26.9274  | 18.4488  |
| Matk     | 0.219326 | 0.33932   | 2.4532   | 1.65468   | 1.48011  | 2.3058    | 1.30253  | 0.622943 |
| Mcam     | 19.1355  | 20.7228   | 7.63275  | 4.31553   | 6.55062  | 5.32875   | 8.82077  | 6.57571  |
| Mcee     | 8.96658  | 13.381    | 25.4898  | 20.0387   | 23.3628  | 23.2783   | 169.963  | 159.979  |
| Mecom    | 2.3624   | 2.05133   | 4.80984  | 7.76851   | 4.9772   | 5.3424    | 11.9594  | 13.8376  |
| Med9os   | 0.229285 | 0.324722  | 1.79055  | 1.50453   | 1.28526  | 1.48866   | 6.06961  | 5.78646  |
| Mef2b    | 1.10864  | 1.54893   | 0.158474 | 0.0999075 | 0.133092 | 0.0836463 | 0        | 0.130416 |
| Mef2d    | 15.6732  | 14.6975   | 4.27478  | 7.96679   | 5.58542  | 5.59224   | 7.31042  | 7.0366   |
| Mest     | 17.1979  | 14.8669   | 4.36217  | 2.39648   | 7.19353  | 5.3092    | 2.26323  | 1.15907  |
| Mettl7b  | 9.58512  | 7.86117   | 5.18215  | 2.12424   | 3.64482  | 3.663     | 423.398  | 353.059  |
| Mfat3l   | 17.6506  | 15.4751   | 5.18932  | 7.52147   | 7.20406  | 6.24968   | 11.0932  | 15.3692  |
| Mgat3    | 4.63055  | 3.90404   | 1.97298  | 1.39789   | 1.61675  | 1.29968   | 17.483   | 16.6632  |
| Mgmt     | 0        | 0.0594691 | 2.94305  | 1.70807   | 4.15488  | 3.77605   | 15.6828  | 13.2969  |
| Mgst1    | 6.93311  | 7.97779   | 68.9956  | 69.7451   | 48.6973  | 59.2359   | 92.8118  | 69.7144  |
| Mgst2    | 0.490367 | 0.277631  | 1.42025  | 0.734468  | 2.92947  | 1.73322   | 0.578027 | 0.354456 |
| Mgst3    | 27.9874  | 27.0665   | 112.905  | 86.7104   | 109.607  | 103.9     | 563.136  | 563.38   |
| Mical1   | 0.55239  | 0.386492  | 3.83183  | 3.68882   | 3.51667  | 3.98516   | 3.36113  | 3.33638  |
| Mien1    | 54.3382  | 49.4761   | 166.322  | 108.446   | 134.097  | 138.041   | 239.349  | 238.372  |
| Mif      | 685.142  | 588.585   | 1959.09  | 1124.98   | 1414.58  | 1543.52   | 1159.67  | 834.996  |
| Minos1   | 16.5671  | 16.0721   | 35.9903  | 23.0376   | 39.3933  | 34.4958   | 93.9329  | 78.8772  |
| Misp     | 1.24637  | 1.20679   | 18.2415  | 21.9893   | 18.3827  | 20.8319   | 21.0602  | 37.4654  |
| Mitd1    | 14.0804  | 13.8762   | 33.2138  | 33.0248   | 33.5069  | 32.498    | 10.9885  | 7.17448  |
| Mks1     | 4.21643  | 4.14237   | 1.47931  | 1.91749   | 1.08217  | 1.56116   | 6.62904  | 5.57118  |
| Mllt4    | 57.3494  | 53.1704   | 20.6577  | 25.6511   | 20.0214  | 20.5757   | 17.7223  | 15.1859  |
| Mmp11    | 14.6847  | 13.8739   | 7.79662  | 6.2813    | 5.35409  | 6.18837   | 4.08656  | 4.59502  |
| Mmp15    | 0.465951 | 0.522252  | 5.96099  | 8.96475   | 5.1346   | 5.80375   | 2.36113  | 1.99706  |
| Mmp7     | 0.635926 | 0.217899  | 173.065  | 205.292   | 78.9129  | 130.366   | 0        | 0        |



|        |           |           |          |          |          |         |          |           |
|--------|-----------|-----------|----------|----------|----------|---------|----------|-----------|
| Mmp9   | 8.41062   | 9.99318   | 1.79984  | 1.76554  | 2.52171  | 2.12074 | 0.161473 | 0.198628  |
| Mnda   | 1.92879   | 2.17863   | 6.13106  | 8.97563  | 7.21012  | 6.40749 | 1.63725  | 1.00649   |
| Mndal  | 0.0234701 | 0.0883551 | 0.960978 | 1.70324  | 1.36772  | 1.56255 | 12.2781  | 9.60783   |
| Mocs3  | 1.83516   | 1.67656   | 3.97327  | 4.49582  | 5.38831  | 5.20318 | 4.81109  | 3.84495   |
| Morn2  | 6.36758   | 7.38577   | 16.4692  | 16.2552  | 19.2651  | 14.6794 | 96.4923  | 89.7278   |
| Moxd1  | 10.0308   | 9.84527   | 2.36668  | 2.06795  | 2.18455  | 2.36673 | 0        | 0.0512072 |
| Mpc2   | 13.8258   | 13.5928   | 37.0107  | 22.7319  | 35.6863  | 30.9593 | 333.762  | 315.247   |
| Mppe1  | 1.51124   | 1.1487    | 4.23205  | 4.68481  | 4.66894  | 4.0473  | 3.92987  | 4.59889   |
| Mras   | 6.42408   | 6.29132   | 2.40194  | 2.08823  | 2.61412  | 2.12831 | 7.28512  | 8.15117   |
| Mrpl52 | 114.137   | 129.285   | 317.019  | 147.378  | 325.738  | 293.353 | 373.547  | 257.227   |
| Mrpl54 | 75.8822   | 73.0927   | 206.393  | 122.701  | 209.986  | 188.221 | 317.694  | 246.81    |
| Mrps12 | 39.5035   | 35.2955   | 97.0089  | 65.9412  | 104.689  | 97.3889 | 30.6374  | 39.0448   |
| Mrps16 | 55.7546   | 56.6392   | 132.612  | 78.4728  | 122.151  | 116.778 | 159.609  | 115.102   |
| Mrps6  | 49.0117   | 48.9867   | 119.132  | 80.4964  | 140.091  | 123.463 | 292.322  | 476.637   |
| Msra   | 1.51779   | 2.10713   | 6.98152  | 6.25819  | 5.6821   | 6.02639 | 289.305  | 263.601   |
| Mt1    | 49.657    | 86.4469   | 735.33   | 577.365  | 390.479  | 539.455 | 1050.54  | 865.754   |
| Mt2    | 22.5871   | 47.467    | 305.013  | 360.704  | 210.799  | 272.539 | 276.655  | 200.367   |
| Mt3    | 0         | 0         | 0.872931 | 1.25744  | 3.20291  | 2.375   | 14.4749  | 8.46876   |
| Mthfd2 | 112.389   | 118.109   | 27.2875  | 31.3885  | 30.7892  | 28.7996 | 4.33949  | 5.17956   |
| Mthfs  | 1.16481   | 1.74387   | 5.78558  | 2.5594   | 3.74654  | 4.18332 | 11.3459  | 10.6958   |
| Mtmr10 | 13.8243   | 12.9351   | 2.48515  | 2.8187   | 4.31942  | 3.46129 | 5.49179  | 5.48249   |
| Mtmr7  | 22.0836   | 20.745    | 9.28712  | 8.79884  | 10.4241  | 9.27344 | 0.80948  | 0.959223  |
| Muc1   | 1.33755   | 1.44376   | 6.65846  | 12.3308  | 4.21841  | 6.08554 | 31.2348  | 53.4481   |
| Muc20  | 0.652044  | 0.70764   | 3.53147  | 7.20008  | 2.05503  | 3.22769 | 16.3989  | 40.2665   |
| Mum111 | 3.30712   | 3.16196   | 0.953981 | 0.97358  | 0.780028 | 1.11316 | 0.604527 | 0.818297  |
| Mx2    | 0.0181238 | 0.102209  | 1.26153  | 2.13817  | 1.54839  | 1.5215  | 0.538442 | 0.596009  |
| Mxd3   | 2.31557   | 3.03189   | 10.4618  | 6.23317  | 7.10686  | 8.33619 | 0.214862 | 0.396056  |
| Mxra7  | 6.21874   | 6.12498   | 1.65551  | 0.879064 | 1.04124  | 1.16498 | 10.7597  | 11.2163   |
| Myc    | 112.33    | 114.841   | 38.5337  | 37.0612  | 60.7409  | 52.0107 | 3.15518  | 2.54242   |

|         |          |           |          |          |          |          |         |         |
|---------|----------|-----------|----------|----------|----------|----------|---------|---------|
| Myeov2  | 59.6341  | 60.281    | 177.765  | 98.1896  | 147.805  | 139.538  | 256.295 | 219.671 |
| Myh10   | 47.1462  | 44.4388   | 13.7093  | 17.8179  | 15.6956  | 15.3229  | 8.12479 | 13.5453 |
| Myh14   | 14.4425  | 11.7688   | 3.39352  | 3.49848  | 2.27259  | 2.99991  | 5.49674 | 5.15582 |
| Myh9    | 175.406  | 163.081   | 64.2538  | 105.056  | 77.6996  | 82.4577  | 27.9124 | 38.0423 |
| Myl6    | 482.768  | 479.893   | 1135.59  | 720.638  | 1143     | 1056.34  | 1640.98 | 1467.21 |
| Myof    | 73.3118  | 74.7845   | 29.8316  | 41.3711  | 35.5959  | 34.4944  | 8.12746 | 10.1081 |
| Myzap   | 5.49958  | 4.86645   | 2.15597  | 2.046    | 2.24857  | 2.00497  | 5.3942  | 4.16394 |
| N6amt2  | 22.563   | 23.6969   | 49.0812  | 36.7224  | 59.7248  | 47.9632  | 24.016  | 24.5765 |
| Naprt1  | 0.260879 | 0.0446413 | 2.38833  | 2.16246  | 1.64674  | 2.13301  | 39.8984 | 27.2178 |
| Nbea    | 5.80188  | 5.24063   | 1.90075  | 2.88176  | 1.99135  | 2.14989  | 1.59276 | 1.89094 |
| Nckap5l | 3.7218   | 3.09194   | 0.855322 | 1.09897  | 0.969645 | 1.06463  | 1.24279 | 2.00685 |
| Ncoa1   | 2.15567  | 2.51435   | 0.666138 | 0.649952 | 0.465032 | 0.523747 | 5.86164 | 6.67049 |
| Ndn     | 0.991948 | 1.08932   | 7.96123  | 6.2573   | 9.67045  | 8.30719  | 3.11078 | 2.71752 |
| Ndrg4   | 5.66175  | 5.02824   | 0.866347 | 1.18197  | 0.787799 | 1.12117  | 3.15345 | 6.86134 |
| Ndufa2  | 112.973  | 101.119   | 340.692  | 159.841  | 307.437  | 277.759  | 796.705 | 544.306 |
| Ndufa3  | 136.226  | 116.074   | 373.726  | 218.914  | 298.716  | 315.042  | 1435.65 | 1099.31 |
| Ndufa8  | 55.8996  | 49.3039   | 136.9    | 90.571   | 138.959  | 132.334  | 551.034 | 515.419 |
| Ndufab1 | 70.4118  | 68.0803   | 149.478  | 105.248  | 156.15   | 147.573  | 221.558 | 229.771 |
| Ndufaf3 | 8.93271  | 8.92861   | 21.6785  | 15.6325  | 18.4422  | 19.0524  | 38.9146 | 36.3589 |
| Ndufs3  | 47.0217  | 46.7531   | 116.722  | 74.8757  | 101.67   | 99.7591  | 258.115 | 240.502 |
| Nedd9   | 2.31998  | 2.94621   | 6.38914  | 8.65115  | 5.64127  | 6.51555  | 8.0005  | 9.20552 |
| Nek1    | 7.393    | 7.1137    | 2.98044  | 4.38324  | 1.97261  | 3.21423  | 1.83658 | 1.82216 |
| Nenf    | 45.3259  | 50.6011   | 130.234  | 77.4501  | 112.011  | 118.499  | 132.048 | 140.099 |
| Nes     | 94.1235  | 85.085    | 26.0052  | 23.6832  | 33.6789  | 29.157   | 10.0184 | 8.69378 |
| Neurl3  | 6.9095   | 7.97963   | 20.216   | 22.04    | 25.0644  | 22.7926  | 6.93486 | 5.25373 |
| Nfat5   | 13.377   | 13.6217   | 5.49353  | 7.21495  | 5.93254  | 5.62399  | 14.998  | 14.6724 |
| Nfe2l2  | 29.9153  | 31.5361   | 59.1542  | 69.2774  | 60.9079  | 62.2395  | 37.1316 | 47.3555 |
| Nfix    | 4.55543  | 5.03964   | 1.50127  | 1.64984  | 1.31185  | 1.41933  | 8.68896 | 9.94169 |
| Nfkbiz  | 24.9397  | 27.8436   | 9.39806  | 10.8242  | 7.69194  | 9.0214   | 4.1004  | 4.07237 |

|          |           |           |          |          |          |          |           |           |
|----------|-----------|-----------|----------|----------|----------|----------|-----------|-----------|
| Nipal4   | 10.4317   | 8.82043   | 2.1769   | 1.61217  | 4.50842  | 3.81819  | 0         | 0.143207  |
| Nmb      | 1.17859   | 0.893528  | 5.77097  | 4.41756  | 5.77231  | 4.80583  | 6.996     | 2.84806   |
| Nmi      | 8.14728   | 10.4903   | 33.044   | 31.1389  | 30.2416  | 29.8565  | 14.8951   | 16.9126   |
| Nppb     | 10.3267   | 10.681    | 1.34074  | 0.563462 | 2.24961  | 1.88909  | 0         | 0         |
| Npr1     | 0.334691  | 0.393561  | 3.4914   | 5.00616  | 2.20315  | 3.01288  | 14.7582   | 15.3599   |
| Npr2     | 1.35577   | 1.64928   | 0.245486 | 0.162954 | 0.188277 | 0.25902  | 21.1509   | 14.85     |
| Npr3     | 6.37493   | 5.66465   | 0.788718 | 0.900014 | 1.16376  | 0.94657  | 2.47226   | 1.93048   |
| Nqo1     | 7.20624   | 5.08767   | 13.6686  | 10.9142  | 29.1208  | 19.9524  | 23.51     | 28.6876   |
| Nr4a1    | 48.7761   | 38.8927   | 4.55602  | 4.88282  | 6.63981  | 6.19054  | 4.31186   | 3.94511   |
| Nradd    | 1.06884   | 1.00656   | 13.2133  | 7.3925   | 14.7948  | 13.6162  | 4.87773   | 3.44668   |
| Nrep     | 1.54315   | 1.48847   | 5.98762  | 3.652    | 5.32839  | 5.29472  | 11.1999   | 12.9997   |
| Nrg1     | 14.4729   | 12.3294   | 2.40421  | 4.08201  | 4.89108  | 4.23724  | 1.50545   | 1.07996   |
| Nrk      | 2.5261    | 2.40577   | 0.125919 | 0.452922 | 0.125489 | 0.214022 | 0.0754232 | 0.0232006 |
| Nt5c     | 104.075   | 95.2295   | 220.777  | 133.584  | 236.064  | 217.366  | 61.9205   | 49.5137   |
| Nuak1    | 4.67116   | 4.59938   | 1.38343  | 2.08445  | 1.89442  | 1.72405  | 2.60164   | 2.95466   |
| Nudt12   | 7.43984   | 7.18279   | 2.69347  | 4.31352  | 2.65901  | 2.81999  | 3.67787   | 5.15931   |
| Nudt16l1 | 19.1312   | 17.8781   | 52.3358  | 35.2015  | 43.299   | 42.3472  | 57.7003   | 52.5234   |
| Nudt19   | 6.23961   | 6.46395   | 22.2343  | 19.1484  | 22.5741  | 21.428   | 151.42    | 190.112   |
| Nyap1    | 6.03047   | 5.58124   | 1.52809  | 1.59183  | 1.30359  | 1.65516  | 1.38343   | 1.25399   |
| Oas1a    | 0.166208  | 0.290508  | 26.3812  | 37.6884  | 26.0842  | 29.3979  | 1.83492   | 3.2977    |
| Oas1b    | 0.244944  | 0.230536  | 3.55423  | 4.35692  | 4.37734  | 3.98061  | 2.76782   | 1.88087   |
| Oas1g    | 0.0447467 | 0         | 6.5109   | 8.86679  | 8.93197  | 7.6296   | 1.06417   | 0.736101  |
| Oas2     | 0.0110288 | 0.0103752 | 3.15755  | 10.8965  | 2.58288  | 4.75938  | 1.96975   | 2.30206   |
| Oas3     | 0.0626923 | 0.0758218 | 5.43412  | 15.5552  | 4.24994  | 6.88203  | 0.159994  | 0.0984207 |
| Oasl1    | 3.56881   | 3.63343   | 14.362   | 22.5777  | 16.6367  | 16.7903  | 1.86159   | 2.67091   |
| Oasl2    | 1.75866   | 2.09409   | 34.4236  | 62.2044  | 32.4199  | 38.0066  | 8.3406    | 9.00242   |
| Ogfod1   | 8.34997   | 7.0867    | 2.5564   | 4.19597  | 3.38617  | 3.36209  | 2.80687   | 2.26645   |
| Ogfr     | 17.2875   | 18.4415   | 36.1813  | 36.5797  | 37.2283  | 35.1724  | 18.4344   | 17.9542   |
| Oit1     | 0.982497  | 0.426986  | 15.8687  | 16.8252  | 12.9409  | 15.0314  | 3.58833   | 2.61856   |

|         |           |           |          |           |          |          |          |           |
|---------|-----------|-----------|----------|-----------|----------|----------|----------|-----------|
| Olfm2   | 1.38571   | 1.64475   | 0.233487 | 0.0560848 | 0.149453 | 0.035212 | 2.32625  | 3.18981   |
| Oma1    | 4.4257    | 4.59542   | 11.8718  | 10.2946   | 11.0049  | 11.7158  | 9.57952  | 13.098    |
| Omp     | 0.765062  | 0.659979  | 2.35129  | 2.21411   | 3.50414  | 2.75454  | 0.505475 | 0.543914  |
| Orai3   | 3.68552   | 4.54054   | 9.98503  | 11.0133   | 9.36034  | 10.1212  | 9.29618  | 10.0435   |
| Osgin1  | 46.0718   | 46.8527   | 11.4662  | 14.1321   | 12.2828  | 12.8734  | 53.6171  | 54.7776   |
| Otub2   | 4.82685   | 5.52813   | 1.97818  | 2.29413   | 1.81573  | 2.15943  | 1.65169  | 2.20093   |
| Otud4   | 28.549    | 29.8547   | 11.744   | 14.009    | 15.5926  | 13.4837  | 6.47333  | 7.46469   |
| Oxld1   | 5.31143   | 5.54876   | 19.2599  | 11.2903   | 13.9932  | 12.9916  | 40.5151  | 29.7561   |
| Padi1   | 4.39199   | 3.80608   | 9.32277  | 11.0941   | 8.32951  | 8.58824  | 9.25E-07 | 0.0899005 |
| Padi3   | 1.50468   | 0.820284  | 0.186585 | 0.117661  | 0.139421 | 0.131256 | 0        | 0         |
| Padi4   | 27.1477   | 24.0374   | 2.79246  | 3.19189   | 2.98643  | 2.79272  | 0.196373 | 0.0603834 |
| Pald    | 7.81055   | 6.81741   | 0.742756 | 0.825258  | 0.743369 | 0.97964  | 1.4998   | 1.58144   |
| Palm3   | 38.3355   | 31.3086   | 6.70751  | 4.27542   | 9.13564  | 6.64002  | 16.3876  | 15.5746   |
| Paox    | 11.8993   | 12.5724   | 35.8239  | 29.9005   | 40.2637  | 36.7795  | 7.11819  | 5.32743   |
| Pard3   | 20.2837   | 19.7811   | 7.7166   | 12.5052   | 8.43383  | 8.62412  | 9.17848  | 12.2544   |
| Parp12  | 4.72906   | 5.4267    | 15.7299  | 28.9283   | 15.5511  | 18.4006  | 6.58067  | 8.72892   |
| Parp14  | 2.07017   | 2.34195   | 8.75529  | 18.4901   | 8.63383  | 10.7379  | 3.97364  | 5.20548   |
| Parp9   | 5.49855   | 6.18667   | 16.9198  | 27.503    | 14.8324  | 19.0094  | 7.5569   | 5.97783   |
| Pbdc1   | 16.5521   | 16.495    | 41.0293  | 32.1999   | 46.3192  | 39.6304  | 10.6724  | 13.7699   |
| Pbp2    | 6.62001   | 5.48972   | 1.2086   | 0.700721  | 4.01364  | 1.71619  | 0        | 0         |
| Pcbd1   | 44.7821   | 44.8092   | 130.426  | 80.7264   | 111.349  | 112.164  | 567.933  | 520.991   |
| Pcbd2   | 10.9406   | 10.6376   | 39.4052  | 29.7289   | 31.3366  | 34.204   | 59.8903  | 54.0803   |
| Pcdh1   | 25.9047   | 23.5272   | 7.79522  | 11.8506   | 9.99619  | 9.80356  | 8.18874  | 7.99521   |
| Pcdh7   | 0.39624   | 0.280756  | 1.54045  | 1.6255    | 2.04843  | 1.8211   | 0.362454 | 0.412546  |
| Pcdhgb7 | 0.0383491 | 0.0583302 | 0.514749 | 1.71662   | 0.825416 | 0.745228 | 2.75841  | 2.01205   |
| Pcolce2 | 13.229    | 12.0205   | 4.20572  | 3.15551   | 7.84363  | 5.6191   | 2.00169  | 2.9888    |
| Pctp    | 13.7695   | 12.5964   | 31.1997  | 30.6349   | 38.2436  | 34.5695  | 18.5811  | 17.3025   |
| Pde4b   | 6.85272   | 6.07763   | 2.85657  | 3.38464   | 2.37829  | 2.36839  | 4.05809  | 3.60304   |
| Pdgfb   | 82.0402   | 82.7349   | 23.4921  | 23.0874   | 30.4664  | 26.8993  | 7.52431  | 7.80244   |

|          |           |           |         |         |          |         |          |          |
|----------|-----------|-----------|---------|---------|----------|---------|----------|----------|
| Pdk4     | 6.46626   | 6.38691   | 1.05652 | 2.74577 | 0.984325 | 1.53465 | 5.17136  | 6.22525  |
| Pdlim2   | 13.2413   | 11.8324   | 5.01374 | 4.82568 | 5.3571   | 4.43517 | 13.8971  | 15.1985  |
| Pdrg1    | 11.2643   | 9.62618   | 25.6905 | 22.3879 | 24.6037  | 26.5852 | 43.9539  | 45.8604  |
| Pdxk     | 1.81148   | 1.78176   | 16.509  | 21.5907 | 14.2038  | 15.7105 | 23.8908  | 22.2726  |
| Pdzk1ip1 | 15.8482   | 14.9394   | 30.1794 | 37.571  | 28.8272  | 31.7997 | 1896.03  | 1318.55  |
| Pepd     | 8.7745    | 10.1518   | 19.5823 | 26.6578 | 20.3472  | 21.8015 | 94.6618  | 89.3813  |
| Pex7     | 6.53048   | 7.72724   | 16.7269 | 13.649  | 16.6344  | 15.5318 | 29.3973  | 32.257   |
| Pgd      | 84.7489   | 67.9255   | 134.801 | 170.892 | 188.858  | 173.044 | 46.0457  | 48.134   |
| Pglyrp1  | 0.561942  | 0.454222  | 8.30338 | 5.55285 | 5.58998  | 7.45634 | 0.948217 | 1.16365  |
| Pgp      | 21.5352   | 21.3124   | 53.1814 | 31.5725 | 45.7533  | 46.5014 | 33.1821  | 28.1577  |
| Phf19    | 4.00237   | 3.63648   | 1.80252 | 1.28242 | 1.32818  | 1.35659 | 0.543053 | 0.417539 |
| Phlda1   | 108.96    | 92.6417   | 24.6306 | 25.4119 | 41.5525  | 33.7446 | 8.43225  | 10.62    |
| Phlda3   | 19.7351   | 21.2456   | 59.6033 | 40.7027 | 75.2337  | 68.0014 | 11.0295  | 6.31974  |
| Phldb2   | 37.4849   | 36.5731   | 16.1259 | 17.0775 | 17.177   | 15.8981 | 39.0054  | 33.2386  |
| Phyhd1   | 1.40396   | 1.68558   | 6.72847 | 3.32218 | 4.12558  | 4.60863 | 48.8936  | 28.4812  |
| Pigr     | 0.0221477 | 0.0104176 | 2.50943 | 5.43447 | 0.740979 | 1.98903 | 7.25187  | 4.13626  |
| Pigyl    | 17.7917   | 20.3404   | 46.4861 | 32.8156 | 39.7402  | 39.8854 | 40.9218  | 37.9516  |
| Pih1d1   | 17.476    | 21.2883   | 62.7146 | 51.0913 | 57.0847  | 58.1722 | 52.819   | 45.5513  |
| Pih1d2   | 1.23782   | 1.0949    | 3.32482 | 3.52882 | 3.67674  | 3.07178 | 1.78099  | 2.59936  |
| Pik3cb   | 15.0959   | 13.5129   | 4.58414 | 5.6484  | 6.24882  | 5.61721 | 5.07473  | 4.77822  |
| Pim1     | 25.2328   | 23.8952   | 4.99237 | 5.54042 | 4.89001  | 4.63728 | 3.36996  | 5.83869  |
| Pim3     | 89.6237   | 82.9855   | 39.1195 | 33.7171 | 36.0651  | 37.1361 | 74.2962  | 55.9669  |
| Pinlyp   | 0.292807  | 0.069014  | 1.62726 | 1.77801 | 2.72971  | 2.49383 | 0        | 0        |
| Pip5k1a  | 34.2329   | 34.871    | 8.06422 | 16.2695 | 10.2982  | 11.0651 | 3.17888  | 3.78371  |
| Pir      | 1.25486   | 1.20806   | 3.69419 | 2.44217 | 4.49203  | 4.19963 | 0.677772 | 1.35409  |
| Pkia     | 7.88871   | 8.58909   | 2.57772 | 2.43696 | 3.50761  | 3.40993 | 7.45852  | 6.45676  |
| Plac8    | 12.8651   | 11.3224   | 200.017 | 206.727 | 164.315  | 186.318 | 42.8363  | 35.0485  |
| Plau     | 470.012   | 423.473   | 64.1737 | 41.5837 | 104.664  | 78.8736 | 294.63   | 529.811  |
| Plcg1    | 16.0741   | 14.2851   | 6.51317 | 8.5564  | 5.96423  | 6.54886 | 8.01859  | 7.13647  |

|          |           |           |          |            |           |           |          |          |
|----------|-----------|-----------|----------|------------|-----------|-----------|----------|----------|
| Plcl2    | 2.0154    | 1.95517   | 0.104424 | 0.00975582 | 0.0780391 | 0.0856939 | 3.24976  | 2.57562  |
| Plet1    | 3.99183   | 4.46717   | 26.6872  | 68.9364    | 36.3018   | 40.3713   | 34.724   | 76.6566  |
| Plk2     | 121.811   | 112.467   | 23.4699  | 22.3405    | 36.9223   | 30.0993   | 4.79334  | 6.17936  |
| Pmaip1   | 61.242    | 72.1063   | 30.5253  | 24.4905    | 39.9059   | 33.8977   | 4.3935   | 2.762    |
| Pmp22    | 0.0500274 | 0.0235428 | 0.747476 | 0.581886   | 1.61287   | 1.08118   | 16.0568  | 17.7325  |
| Pnp      | 15.7227   | 16.1904   | 33.9904  | 29.3039    | 36.438    | 33.1558   | 15.2291  | 16.3103  |
| Pnrc1    | 21.3131   | 25.2427   | 51.3365  | 49.3242    | 42.7077   | 44.9813   | 53.7494  | 53.6061  |
| Podxl    | 31.3825   | 27.5667   | 9.44647  | 10.2825    | 12.1844   | 10.8129   | 46.6777  | 33.3997  |
| Pof1b    | 0.219033  | 0.154539  | 1.91273  | 2.56508    | 1.75058   | 2.00537   | 0.325998 | 0.842203 |
| Polr2l   | 14.1367   | 11.1825   | 31.7795  | 17.5085    | 37.2877   | 31.5445   | 38.9322  | 34.2619  |
| Pop1     | 28.412    | 25.384    | 9.70625  | 10.954     | 14.2643   | 13.5494   | 5.18663  | 5.47559  |
| Pou3f3   | 0.0985731 | 0.0794922 | 7.25576  | 10.9053    | 7.03306   | 8.51063   | 75.3402  | 93.4477  |
| Ppdpf    | 26.1314   | 22.6593   | 65.2329  | 39.9486    | 56.9825   | 53.6725   | 131.019  | 90.1637  |
| Ppm1h    | 0.183406  | 0.289567  | 1.37516  | 3.1196     | 1.49308   | 1.92746   | 10.6689  | 12.2314  |
| Ppp1r12b | 4.01313   | 4.07803   | 0.487095 | 1.1032     | 0.443832  | 0.514778  | 0.735687 | 0.554284 |
| Ppp1r15a | 34.2125   | 39.342    | 10.1753  | 11.0095    | 8.78577   | 9.26407   | 12.5572  | 15.3748  |
| Ppp1r1b  | 0.736481  | 1.00133   | 10.8401  | 11.7792    | 5.34469   | 8.82901   | 118.646  | 211.638  |
| Ppp1r26  | 0.430648  | 0.687185  | 2.05656  | 2.72962    | 1.23856   | 2.06212   | 2.56479  | 2.90204  |
| Prap1    | 0         | 0         | 2.32617  | 3.14484    | 2.93875   | 3.4223    | 3.21539  | 3.28704  |
| Prdx1    | 362.514   | 353.989   | 782.641  | 619.955    | 809.01    | 748.704   | 404.612  | 406.79   |
| Prickle1 | 6.31621   | 6.67589   | 1.08116  | 1.03479    | 1.35381   | 1.3349    | 2.66397  | 2.85813  |
| Prkcdbp  | 5.49336   | 6.07437   | 18.0114  | 12.1127    | 13.817    | 14.4912   | 38.5117  | 42.6189  |
| Prkch    | 6.57446   | 5.68307   | 2.13023  | 2.35992    | 1.9844    | 2.27813   | 5.73404  | 6.10041  |
| Prkci    | 64.6342   | 64.8417   | 18.669   | 27.4727    | 21.3516   | 21.7542   | 7.3414   | 9.37938  |
| Prl6a1   | 0         | 0.0552613 | 0.846287 | 0.98496    | 1.23832   | 1.10043   | 0        | 0        |
| Procr    | 37.3316   | 34.9416   | 6.5395   | 5.18451    | 9.07101   | 8.01247   | 4.90746  | 3.57512  |
| Prr15    | 1.28129   | 1.07933   | 5.93814  | 5.02358    | 3.01165   | 3.94295   | 7.60792  | 7.6291   |
| Prr15l   | 2.43228   | 2.3545    | 31.7228  | 29.9869    | 18.1044   | 23.5168   | 64.6805  | 76.5048  |
| Prr5l    | 1.86809   | 1.70114   | 0.364635 | 0.211037   | 0.421154  | 0.32156   | 1.52899  | 1.38385  |

|           |          |          |           |          |          |          |           |          |
|-----------|----------|----------|-----------|----------|----------|----------|-----------|----------|
| Prrg3     | 0.853169 | 1.20374  | 3.9832    | 6.50029  | 2.1844   | 3.63037  | 0.381114  | 0.755479 |
| Prss22    | 437.237  | 379.055  | 84.0528   | 40.4397  | 82.8498  | 79.1001  | 0.420183  | 0.38735  |
| Prss27    | 6.13605  | 4.28482  | 0.601467  | 0.272261 | 0.82885  | 0.244289 | 0         | 0        |
| Prss46    | 1.27769  | 1.27385  | 0.0416373 | 0        | 0        | 0        | 0         | 0        |
| Prss52    | 1.96542  | 0.993401 | 0.106326  | 0.13407  | 0.357062 | 0.168449 | 0         | 0        |
| Psemb10   | 19.0122  | 19.65    | 44.8445   | 32.3389  | 40.6363  | 42.2674  | 33.2803   | 34.1316  |
| Psemb8    | 1.39669  | 2.15546  | 23.7313   | 37.5875  | 16.7051  | 24.6951  | 29.6997   | 24.7583  |
| Psemb9    | 0.70838  | 0.364172 | 11.0144   | 12.9853  | 5.44081  | 7.70863  | 15.241    | 9.59099  |
| Psm�10    | 17.8301  | 20.3513  | 44.3356   | 36.7754  | 41.7845  | 42.9442  | 11.9616   | 17.9479  |
| Psmē1     | 102.533  | 118.554  | 252.268   | 218.25   | 208.922  | 226.97   | 160.089   | 156.816  |
| Psmē2     | 46.8913  | 56.3287  | 178.708   | 128.475  | 147.74   | 145.306  | 89.2689   | 77.0622  |
| Psmē2b    | 3.41151  | 3.75597  | 0.203965  | 0.547039 | 0.386952 | 0.161559 | 0.0117726 | 0.167513 |
| Psmg4     | 21.3782  | 21.8595  | 69.3884   | 34.6204  | 60.3621  | 53.7449  | 89.7264   | 37.6576  |
| Psors1c2  | 12.3921  | 9.27372  | 6.00248   | 2.21091  | 4.98033  | 5.34434  | 1.07869   | 0.220779 |
| Psph      | 45.8034  | 50.0599  | 21.1259   | 16.9827  | 22.7016  | 19.0908  | 12.416    | 10.2488  |
| Psrc1     | 5.32477  | 5.9425   | 16.9082   | 11.1742  | 13.951   | 13.694   | 0.308798  | 0.189843 |
| Ptbp2     | 16.2403  | 19.5995  | 8.80111   | 6.81897  | 8.90072  | 7.94718  | 9.33997   | 7.286    |
| Ptges     | 0.374974 | 0.451973 | 2.87575   | 2.13479  | 1.72793  | 1.96819  | 9.62625   | 8.15215  |
| Ptges2    | 8.94971  | 7.86271  | 17.9578   | 17.0998  | 19.6102  | 17.8576  | 14.8328   | 17.4867  |
| Ptgs2     | 40.4811  | 38.6208  | 11.4977   | 18.3255  | 18.0191  | 16.0274  | 0.488142  | 0.788204 |
| Ptpn21    | 17.6063  | 16.7819  | 5.6181    | 7.4735   | 6.55011  | 6.59557  | 6.38777   | 6.80773  |
| Ptprs     | 50.6523  | 46.43    | 25.4268   | 22.4471  | 21.3438  | 21.9213  | 8.12076   | 4.58227  |
| Pts       | 4.57977  | 4.80302  | 21.8855   | 17.4292  | 18.2279  | 17.1977  | 88.1706   | 86.1473  |
| Pycr1     | 4.20334  | 4.30411  | 1.33033   | 1.86423  | 1.12288  | 1.16116  | 0.0883845 | 0.163076 |
| Qk        | 51.5868  | 52.682   | 14.8702   | 17.0937  | 19.1708  | 16.9092  | 11.26     | 14.1137  |
| Rab11a    | 49.6506  | 51.6518  | 110.573   | 91.8806  | 117.206  | 110.487  | 74.7827   | 65.636   |
| Rab11fip5 | 35.1102  | 36.8052  | 15.2218   | 16.5851  | 15.9689  | 15.7915  | 21.5898   | 19.0349  |
| Rab15     | 4.08069  | 4.26723  | 1.57002   | 1.35853  | 0.905504 | 1.30282  | 2.54346   | 3.1287   |
| Rab17     | 0.504228 | 0.442185 | 6.60671   | 3.9385   | 2.91466  | 3.0249   | 34.039    | 28.8653  |

|          |           |           |          |          |          |          |          |          |
|----------|-----------|-----------|----------|----------|----------|----------|----------|----------|
| Rab19    | 2.62567   | 2.93989   | 8.05786  | 8.09594  | 5.23845  | 7.38712  | 4.8447   | 4.66029  |
| Rab20    | 12.4032   | 11.1339   | 25.4282  | 31.1558  | 21.3268  | 27.3126  | 13.607   | 31.7877  |
| Rab26os  | 13.9045   | 12.2403   | 34.1628  | 12.6049  | 30.8319  | 30.7828  | 13.3333  | 12.7625  |
| Rab32    | 4.50265   | 4.19663   | 12.1194  | 19.2112  | 14.1973  | 14.2573  | 5.53477  | 7.43952  |
| Rab3b    | 7.90387   | 7.21687   | 2.38841  | 1.03416  | 2.00384  | 1.59963  | 4.7737   | 3.315    |
| Rab6b    | 5.39047   | 5.9605    | 1.73597  | 1.65041  | 1.80237  | 1.74829  | 9.88484  | 10.1018  |
| Rac3     | 6.43792   | 6.91166   | 25.6564  | 19.8894  | 23.079   | 23.88    | 2.13575  | 2.46024  |
| Ramp1    | 1.97058   | 1.85419   | 11.7358  | 7.65414  | 7.49308  | 8.70372  | 0.917472 | 0.442427 |
| Ramp2    | 0.349851  | 0.879102  | 2.07117  | 2.50262  | 2.31755  | 2.66681  | 52.4758  | 43.884   |
| Rap1gap  | 2.30998   | 1.84778   | 6.60388  | 6.71047  | 5.74272  | 6.21196  | 60.5167  | 77.9964  |
| Rap1gap2 | 1.46835   | 1.30131   | 4.47081  | 8.00357  | 5.41672  | 5.43934  | 7.89098  | 9.68526  |
| Rapgef2  | 5.61017   | 5.57732   | 1.73684  | 2.60618  | 1.98686  | 1.9664   | 1.86497  | 2.13079  |
| Rapgef3  | 10.9521   | 9.21093   | 2.93737  | 3.93874  | 4.90604  | 4.56327  | 40.0808  | 31.4112  |
| Rapgef5  | 3.23394   | 2.79123   | 0.460108 | 0.912614 | 0.674472 | 0.70952  | 1.52503  | 2.81421  |
| Rasa3    | 20.1521   | 18.1614   | 3.98049  | 3.80721  | 5.67674  | 4.83758  | 2.82601  | 2.75868  |
| Rassf10  | 0.0122469 | 0.0230431 | 2.03088  | 2.16295  | 1.32034  | 1.6143   | 1.82249  | 3.58714  |
| Rassf3   | 5.98552   | 5.4308    | 11.1718  | 16.1329  | 9.71389  | 11.6127  | 17.8138  | 23.2432  |
| Rassf8   | 10.703    | 8.2803    | 1.82036  | 4.05691  | 2.62209  | 3.14147  | 2.79251  | 6.29481  |
| Rbbp9    | 9.89761   | 10.3747   | 19.9276  | 28.3816  | 16.2332  | 19.4761  | 34.6087  | 44.51    |
| Rbm43    | 6.65325   | 7.32249   | 18.601   | 20.7802  | 15.4318  | 17.1564  | 5.99291  | 7.78559  |
| Rbmx     | 6.21449   | 5.54873   | 19.2129  | 16.277   | 23.4284  | 21.6041  | 37.4199  | 29.8458  |
| Rbp1     | 2.43882   | 2.18545   | 26.2013  | 18.6359  | 15.7311  | 19.6141  | 10.6602  | 8.31626  |
| Rbpj     | 39.0134   | 40.0979   | 16.0414  | 15.2856  | 15.4864  | 14.7743  | 5.06002  | 5.08358  |
| Rcbtb2   | 2.4241    | 2.64466   | 7.4753   | 8.27839  | 7.0088   | 7.12698  | 8.9037   | 8.47472  |
| Rcn3     | 3.24563   | 3.08546   | 0.916197 | 0.651755 | 0.513109 | 0.558024 | 43.0872  | 47.5078  |
| Rdh10    | 9.5938    | 13.5056   | 22.1592  | 26.5187  | 28.2096  | 26.4545  | 12.7817  | 14.2459  |
| Rdm1     | 9.91033   | 10.4953   | 42.8732  | 29.3501  | 25.8037  | 27.8469  | 16.718   | 13.3206  |
| Rem2     | 12.9955   | 10.8669   | 3.41789  | 1.96731  | 4.2419   | 3.96826  | 0.42369  | 0.43416  |
| Renbp    | 8.59696   | 10.4229   | 2.97108  | 2.01043  | 1.8262   | 2.91862  | 61.8096  | 40.3198  |



|         |          |          |          |          |          |          |          |           |
|---------|----------|----------|----------|----------|----------|----------|----------|-----------|
| Rfc1    | 44.9575  | 42.8373  | 21.252   | 24.3832  | 19.022   | 20.0003  | 5.97048  | 6.88642   |
| Rftn1   | 9.6012   | 8.61104  | 2.89408  | 2.18856  | 4.3952   | 3.41537  | 3.68578  | 4.36358   |
| Rgl1    | 2.45516  | 1.75285  | 4.89474  | 6.84575  | 6.96722  | 6.66015  | 32.6914  | 28.0559   |
| Rgs16   | 34.0302  | 30.9766  | 8.74933  | 11.1395  | 18.1622  | 13.8283  | 0.336043 | 0.275527  |
| Rhob    | 108.849  | 107.914  | 22.7848  | 16.4096  | 23.3945  | 20.7599  | 36.0755  | 37.2622   |
| Rhof    | 11.2645  | 9.45293  | 3.81876  | 4.17198  | 4.86848  | 4.63362  | 4.67063  | 8.84258   |
| Rimklb  | 4.24649  | 4.13422  | 0.409691 | 0.137791 | 0.288676 | 0.308761 | 0.126095 | 0.193908  |
| Rin1    | 17.6229  | 17.5058  | 6.76647  | 6.6912   | 10.4076  | 8.95367  | 1.51364  | 0.782108  |
| Ripk3   | 0.85679  | 0.71677  | 3.37737  | 3.58524  | 4.7215   | 4.03085  | 1.57169  | 0.790596  |
| Rn45s   | 140.801  | 140.339  | 713.026  | 600.677  | 1094.53  | 813.068  | 348.181  | 354.96    |
| Rnf122  | 8.15619  | 7.86604  | 3.2412   | 3.35329  | 3.05004  | 3.53252  | 0.933668 | 2.03209   |
| Rnf130  | 26.9803  | 30.6119  | 12.3555  | 5.95817  | 10.3918  | 10.132   | 38.0238  | 48.9496   |
| Rnf135  | 5.12989  | 4.89223  | 12.135   | 12.0056  | 12.3249  | 11.9559  | 5.69302  | 4.33376   |
| Rnf24   | 7.28959  | 7.17619  | 2.1059   | 3.25598  | 2.20618  | 2.27987  | 67.7563  | 42.3571   |
| Rnf39   | 11.3582  | 10.3315  | 2.33857  | 2.41288  | 2.89719  | 2.84294  | 0.38003  | 0.817545  |
| Rogdi   | 11.227   | 11.6395  | 23.9815  | 30.5841  | 23.0463  | 24.4591  | 172.019  | 140.48    |
| Rpl41   | 3241.51  | 2564.89  | 7559.05  | 3272.14  | 8146.18  | 7013.56  | 1473.96  | 1355.09   |
| Rpp25l  | 19.0951  | 14.3615  | 41.8594  | 29.0733  | 38.0144  | 33.8166  | 27.8931  | 30.0273   |
| Rps27l  | 195.731  | 212.536  | 512.233  | 297.611  | 590.141  | 487.919  | 425.482  | 323.028   |
| Rps4l   | 2.22863  | 2.24962  | 9.71413  | 10.8381  | 11.9261  | 11.3807  | 44.0112  | 46.146    |
| Rps6ka2 | 6.47033  | 6.59822  | 1.21176  | 1.27904  | 1.63792  | 1.26937  | 1.25052  | 1.02573   |
| Rsad2   | 1.03685  | 1.12384  | 3.17686  | 8.03444  | 4.27335  | 4.75848  | 7.84989  | 9.82204   |
| Rsrp1   | 16.266   | 22.9705  | 52.3016  | 51.4817  | 68.3434  | 60.0868  | 195.523  | 131.186   |
| Rtp4    | 0.610899 | 0.657209 | 34.4302  | 43.2434  | 31.858   | 32.7077  | 9.67809  | 12.6421   |
| Rundc3b | 1.85988  | 1.59659  | 0.334103 | 0.442988 | 0.489744 | 0.271171 | 0.138397 | 0.0425635 |
| Rusc2   | 10.7952  | 10.9159  | 3.82479  | 4.841    | 4.09446  | 3.89635  | 7.00219  | 8.45837   |
| Rxra    | 4.22188  | 3.81375  | 8.14941  | 10.8602  | 8.09556  | 8.57713  | 16.374   | 15.1092   |
| Rybp    | 14.2272  | 13.9847  | 5.33086  | 8.11859  | 6.25202  | 6.38115  | 1.67234  | 3.33448   |
| S100a1  | 33.7789  | 36.918   | 97.8241  | 78.5831  | 78.6596  | 89.7554  | 1343.37  | 1137.43   |

|           |          |          |          |          |          |          |           |          |
|-----------|----------|----------|----------|----------|----------|----------|-----------|----------|
| S100a14   | 58.3343  | 51.1368  | 29.4221  | 10.5084  | 19.2672  | 20.5294  | 0.955466  | 0.65597  |
| S100a3    | 6.73296  | 5.13572  | 1.68208  | 0.494811 | 2.16307  | 1.86684  | 0         | 0.548676 |
| S100g     | 0        | 0        | 0.445798 | 2.74663  | 0.165811 | 0.629282 | 2796.33   | 1609.43  |
| Samd9l    | 5.46406  | 6.87021  | 29.1445  | 39.3779  | 21.8739  | 26.633   | 57.6996   | 45.0419  |
| Sars      | 123.805  | 135.363  | 53.2759  | 53.1991  | 50.6078  | 55.1507  | 48.7132   | 48.205   |
| Scand1    | 23.3358  | 28.6095  | 59.8046  | 50.7221  | 68.2732  | 67.2828  | 160.988   | 154.285  |
| Scarf2    | 8.09247  | 9.03325  | 1.02128  | 0.580531 | 0.628798 | 0.880312 | 10.9961   | 11.7167  |
| Scn1b     | 0.69802  | 0.94279  | 3.02442  | 2.23191  | 3.80186  | 3.7604   | 15.6837   | 21.8296  |
| Scp2      | 14.9058  | 15.3168  | 41.0308  | 34.3463  | 33.5669  | 35.1728  | 184.273   | 177.794  |
| Scrn1     | 3.4528   | 2.91526  | 0.112399 | 0.118123 | 0.18889  | 0.08898  | 1.35804   | 3.71072  |
| Sdhaf1    | 13.9598  | 15.3751  | 43.327   | 34.363   | 47.2832  | 42.2173  | 53.2209   | 46.3258  |
| Sdpr      | 0.381398 | 0.239222 | 1.71809  | 4.55698  | 1.80315  | 2.57107  | 22.1934   | 16.752   |
| Sec23b    | 30.5973  | 29.406   | 58.4255  | 79.9785  | 62.7574  | 62.107   | 35.5544   | 42.4011  |
| Sec61b    | 122.421  | 107.731  | 293.866  | 166.944  | 309.841  | 269.235  | 150.232   | 127.455  |
| Sel1l3    | 10.7792  | 10.3427  | 2.84101  | 3.94937  | 2.44096  | 2.65832  | 13.3508   | 11.9582  |
| Selenbp1  | 1.75071  | 1.9014   | 51.0429  | 37.0981  | 12.9597  | 27.6006  | 213.83    | 171.008  |
| Selk      | 38.3841  | 43.7419  | 101.824  | 63.4774  | 95.8419  | 86.703   | 180.081   | 137.137  |
| Sema3a    | 5.34755  | 4.27581  | 0.899657 | 1.13771  | 1.0974   | 1.04779  | 0.0775799 | 0.167069 |
| Sema3e    | 13.2063  | 11.6086  | 2.62251  | 2.83274  | 3.61128  | 3.10718  | 0.471276  | 0.111514 |
| Sema4g    | 3.91292  | 3.30072  | 1.77571  | 1.42895  | 0.683889 | 0.954    | 34.5657   | 18.9522  |
| Sema7a    | 7.38863  | 6.32156  | 1.85723  | 3.62334  | 3.39907  | 2.37307  | 3.04632   | 4.13169  |
| Sepp1     | 3.46452  | 3.54933  | 45.4666  | 126.746  | 42.9907  | 60.1351  | 444.924   | 432.415  |
| Sept4     | 3.32129  | 2.35705  | 8.70164  | 9.92772  | 6.64869  | 7.20005  | 49.7089   | 78.2199  |
| Sepw1     | 79.408   | 70.3933  | 289.494  | 164.738  | 328.565  | 305.009  | 306.591   | 237.06   |
| Serf1     | 29.9124  | 36.4622  | 93.8455  | 51.9636  | 80.8046  | 69.5598  | 45.0861   | 38.9902  |
| Serpina3g | 0        | 0        | 0.56105  | 1.43564  | 0.76532  | 0.926842 | 2.22837   | 0.402984 |
| Serpib9   | 11.5031  | 12.0336  | 20.5209  | 33.2172  | 27.1953  | 25.9244  | 17.9628   | 28.0141  |
| Serpib9b  | 12.5222  | 12.3962  | 0.564541 | 0.798259 | 1.26508  | 1.21879  | 0         | 0        |
| Serpine1  | 108.729  | 90.3987  | 42.471   | 29.7979  | 41.8294  | 39.0637  | 0.51023   | 0.523016 |

|          |           |           |          |          |          |          |          |          |
|----------|-----------|-----------|----------|----------|----------|----------|----------|----------|
| Serpine2 | 2.87757   | 3.4614    | 12.2806  | 8.23185  | 17.4891  | 14.3507  | 41.939   | 25.629   |
| Setd7    | 16.8689   | 15.509    | 6.62381  | 8.53867  | 6.23326  | 6.34057  | 4.48942  | 4.38183  |
| Sfta2    | 2.45158   | 2.08377   | 8.21084  | 4.94421  | 7.48504  | 6.80731  | 0.720436 | 1.32424  |
| Sgms2    | 31.5004   | 29.4114   | 10.602   | 20.8726  | 12.0568  | 13.4155  | 13.7248  | 11.0189  |
| Sgtb     | 3.97159   | 3.19222   | 0.551242 | 0.956863 | 0.956602 | 0.675526 | 0.287009 | 0.294182 |
| Sh3bgrl3 | 76.8191   | 73.5845   | 288.909  | 234.329  | 309.575  | 304.303  | 506.677  | 394.003  |
| Sh3bp2   | 9.22511   | 9.74226   | 4.64457  | 3.86227  | 4.44889  | 4.11292  | 5.15642  | 5.26766  |
| Sh3bp5   | 29.4384   | 25.1017   | 9.43722  | 9.54794  | 12.2218  | 9.81451  | 27.9056  | 26.2918  |
| Sh3kbp1  | 5.61415   | 6.50378   | 13.4086  | 10.5749  | 16.7143  | 14.7246  | 4.3763   | 4.25255  |
| Shisa5   | 31.7971   | 32.1676   | 56.0246  | 84.7943  | 58.3695  | 66.0051  | 83.7912  | 97.4181  |
| Shmt2    | 110.727   | 113.739   | 49.5438  | 55.4454  | 60.1131  | 55.0627  | 108.823  | 70.5643  |
| Siglecg  | 1.62083   | 0.911755  | 0        | 0        | 0        | 0        | 0.314412 | 0.322252 |
| Sim2     | 0         | 0.0657071 | 6.55008  | 11.664   | 6.99605  | 7.68513  | 6.23674  | 17.0923  |
| Skil     | 22.7105   | 24.3056   | 10.1277  | 9.89099  | 10.3539  | 9.26     | 2.72784  | 2.78124  |
| Slamf9   | 3.98181   | 3.82883   | 0.557496 | 0.156221 | 0.156051 | 0.29436  | 12.6804  | 8.86063  |
| Slc12a4  | 20.7159   | 18.7223   | 6.68883  | 6.42325  | 8.11928  | 7.41176  | 10.4818  | 12.6908  |
| Slc16a12 | 0.0220219 | 0.0725084 | 2.00829  | 3.34652  | 1.30981  | 1.84929  | 18.0268  | 15.1206  |
| Slc1a4   | 20.9773   | 21.7134   | 3.81271  | 5.22203  | 4.36802  | 4.38967  | 9.55707  | 10.6452  |
| Slc22a18 | 0.152989  | 0.0576026 | 1.89747  | 0.911561 | 1.66998  | 1.25195  | 778.909  | 482.797  |
| Slc23a2  | 4.03674   | 4.47713   | 1.11148  | 1.74089  | 1.59637  | 1.48682  | 4.42513  | 3.99923  |
| Slc25a10 | 9.47739   | 9.08568   | 21.9278  | 22.3917  | 24.2248  | 23.533   | 86.1886  | 64.4294  |
| Slc25a11 | 33.4359   | 36.5092   | 77.236   | 68.6622  | 75.9471  | 71.6874  | 92.6368  | 95.8359  |
| Slc25a38 | 3.61563   | 4.38368   | 8.80667  | 7.29629  | 11.085   | 10.5474  | 23.3707  | 17.0072  |
| Slc25a48 | 2.36686   | 1.82301   | 5.44598  | 14.3365  | 4.91829  | 7.33026  | 1.09547  | 1.57117  |
| Slc27a3  | 0.856368  | 0.695963  | 3.05731  | 2.28087  | 2.46096  | 2.65849  | 5.55629  | 2.27779  |
| Slc27a6  | 0.0839455 | 0.126378  | 2.0982   | 2.90381  | 3.30874  | 2.5081   | 0        | 0        |
| Slc35a1  | 5.80451   | 5.75007   | 14.2452  | 11.9769  | 13.7705  | 12.3081  | 19.9812  | 21.3806  |
| Slc36a4  | 2.79317   | 2.97634   | 0.689695 | 1.24564  | 1.08761  | 0.754907 | 0.548941 | 0.590646 |
| Slc37a4  | 3.66295   | 4.84999   | 15.6453  | 11.7277  | 8.81832  | 10.7926  | 54.0722  | 34.1045  |

|          |          |          |          |          |          |         |           |          |
|----------|----------|----------|----------|----------|----------|---------|-----------|----------|
| Slc38a2  | 107.269  | 117.785  | 36.0008  | 41.7674  | 41.3661  | 38.0788 | 20.675    | 30.189   |
| Slc39a4  | 3.01459  | 2.79947  | 6.01163  | 11.6768  | 6.22028  | 7.59484 | 0.471804  | 0.217589 |
| Slc3a2   | 140.954  | 149.979  | 47.5144  | 49.5267  | 58.6947  | 52.9349 | 188.232   | 106.147  |
| Slc40a1  | 9.38076  | 9.3866   | 22.5384  | 29.7474  | 14.944   | 18.7025 | 14.6579   | 12.594   |
| Slc52a3  | 2.45976  | 2.51726  | 0.529941 | 0.247029 | 0.360442 | 0.34054 | 11.4651   | 10.0987  |
| Slc6a9   | 8.76197  | 10.8263  | 2.61426  | 3.57801  | 2.40933  | 3.1876  | 9.61692   | 12.2147  |
| Slc7a1   | 27.4386  | 29.2557  | 4.07604  | 6.65495  | 4.82909  | 4.67252 | 1.93801   | 4.06663  |
| Slc7a5   | 78.5531  | 79.026   | 16.0613  | 20.0416  | 20.2991  | 18.8379 | 2.39418   | 2.40974  |
| Slc7a6   | 26.9173  | 24.6549  | 9.14679  | 12.4882  | 12.0541  | 11.6666 | 2.24827   | 2.89153  |
| Slc9a5   | 5.95771  | 5.27795  | 1.79076  | 1.4458   | 1.69798  | 1.61671 | 0.816195  | 0.443031 |
| Slfn2    | 6.20021  | 6.11889  | 16.2972  | 19.8533  | 17.9186  | 17.7137 | 12.6595   | 11.3743  |
| Slfn9    | 1.71318  | 1.94438  | 4.26402  | 14.3924  | 3.5335   | 5.38851 | 0.0658009 | 0.121424 |
| Slk      | 40.3432  | 40.8887  | 15.6645  | 20.201   | 17.9269  | 17.3747 | 17.706    | 15.2112  |
| Slpi     | 0        | 0        | 1.28706  | 0.595027 | 2.01626  | 1.01981 | 0.686563  | 0.421605 |
| Smagp    | 32.0494  | 33.963   | 72.3541  | 65.471   | 62.0264  | 65.1987 | 103.032   | 141.43   |
| Smim1    | 3.00078  | 2.85372  | 7.57505  | 8.30352  | 5.57211  | 6.44636 | 37.9061   | 26.6421  |
| Smim22   | 4.88991  | 5.11132  | 51.0054  | 21.7697  | 42.1808  | 43.5733 | 136.913   | 113.3    |
| Smim24   | 0        | 0.287356 | 1.13098  | 2.376    | 1.26344  | 1.79444 | 208.691   | 165.355  |
| Smim4    | 6.03651  | 6.04634  | 19.5169  | 8.69796  | 19.3035  | 13.2997 | 109.93    | 86.8961  |
| Smim6    | 0.25405  | 0.335059 | 5.01632  | 2.98489  | 4.35293  | 4.46508 | 24.3891   | 18.4946  |
| Smpdl3a  | 0.302021 | 0.379016 | 3.00844  | 3.93451  | 1.52923  | 1.94056 | 87.9592   | 74.6778  |
| Smtn     | 86.7325  | 83.4718  | 30.6545  | 32.4148  | 38.9669  | 37.119  | 51.8467   | 56.0341  |
| Smtnl2   | 4.15273  | 4.5013   | 15.1191  | 8.8042   | 5.97071  | 9.32476 | 18.8759   | 17.4429  |
| Smurf1   | 35.3584  | 34.7921  | 12.7341  | 15.9591  | 15.6746  | 15.0169 | 4.88673   | 5.7522   |
| Snhg1    | 185.001  | 201.903  | 100.593  | 53.643   | 106.861  | 97.8925 | 26.8882   | 13.0773  |
| Snora16a | 0        | 0        | 0        | 12.0109  | 0        | 0       | 0         | 0        |
| Snora21  | 0        | 0        | 49.3428  | 0        | 0        | 0       | 0         | 0        |
| Snora33  | 0        | 167.903  | 0        | 0        | 0        | 0       | 0         | 0        |
| Snora34  | 50.2525  | 0        | 0        | 0        | 0        | 0       | 0         | 0        |

|         |          |          |          |          |          |          |           |          |
|---------|----------|----------|----------|----------|----------|----------|-----------|----------|
| Snora52 | 0        | 10.8134  | 0        | 0        | 0        | 0        | 0         | 0        |
| Snora64 | 55.898   | 43.9456  | 0        | 0        | 0        | 0        | 0         | 0        |
| Snora78 | 0        | 0        | 0        | 3.73342  | 0        | 0        | 0         | 0        |
| Snora7a | 0        | 0        | 0        | 0        | 0        | 27.3531  | 0         | 0        |
| Snora81 | 0        | 0        | 0        | 2.81472  | 3.61868  | 0        | 0         | 0        |
| Snrpe   | 175.959  | 178.538  | 442.669  | 201.034  | 424.641  | 380.222  | 96.9645   | 76.897   |
| Snx9    | 70.428   | 67.8004  | 23.6387  | 34.0793  | 30.3602  | 30.459   | 17.7945   | 24.039   |
| Sorbs2  | 14.3023  | 12.532   | 3.7765   | 3.76539  | 5.47473  | 4.34793  | 4.98773   | 4.60819  |
| Sorbs3  | 11.8075  | 12.7505  | 28.6699  | 28.5454  | 25.7247  | 26.219   | 65.4954   | 58.9346  |
| Sort1   | 5.21555  | 5.39598  | 2.0298   | 2.59757  | 2.14456  | 2.02716  | 15.8827   | 24.301   |
| Sox11   | 18.9935  | 17.4755  | 6.75749  | 5.84648  | 9.28812  | 7.9138   | 0.0878758 | 0.144173 |
| Sox17   | 2.35559  | 2.05885  | 13.4003  | 13.0345  | 13.39    | 13.3331  | 8.58708   | 6.72273  |
| Sp100   | 0.102563 | 0.11582  | 3.13172  | 6.907    | 3.28043  | 4.09554  | 10.9786   | 13.7265  |
| Spa17   | 0.867647 | 1.19007  | 5.87693  | 3.68605  | 3.43255  | 4.63612  | 64.296    | 62.6115  |
| Spaca7  | 1.80272  | 2.41832  | 8.32027  | 6.02198  | 9.39229  | 6.83892  | 0         | 0.251674 |
| Sparc   | 88.6251  | 77.0813  | 17.9935  | 11.5227  | 21.1262  | 16.5617  | 85.4915   | 72.453   |
| Spc25   | 18.9515  | 20.907   | 61.6621  | 42.548   | 48.7297  | 47.6112  | 12.2964   | 6.11388  |
| Specc1  | 28.3749  | 26.1833  | 9.95379  | 15.7494  | 11.7522  | 12.0429  | 4.59287   | 6.46654  |
| Spg20   | 27.3292  | 25.4861  | 10.7884  | 11.8277  | 12.3464  | 10.9593  | 6.5584    | 9.71214  |
| Spint2  | 272.398  | 288.419  | 613.444  | 503.662  | 597.654  | 583.989  | 525.951   | 556.379  |
| Spn     | 2.02886  | 1.7337   | 0.402459 | 0.381857 | 0.521627 | 0.511435 | 1.57693   | 1.3748   |
| Spp1    | 786.743  | 868.529  | 3101.5   | 3473.41  | 2931.69  | 3061.76  | 2101.16   | 1705.21  |
| Sprr2e  | 0.344193 | 0.649298 | 3.44704  | 1.20707  | 2.56868  | 3.03712  | 0         | 0        |
| Sprr2g  | 0.767941 | 0.885275 | 7.50043  | 6.06416  | 8.2779   | 7.62886  | 0         | 0        |
| Sprtn   | 7.18799  | 7.1982   | 2.10987  | 3.95717  | 1.92254  | 2.66721  | 2.74155   | 2.83513  |
| Spry1   | 34.529   | 32.953   | 14.868   | 12.174   | 14.3101  | 13.7418  | 12.3349   | 15.8781  |
| Spsb4   | 3.89567  | 4.31722  | 9.47238  | 10.7782  | 9.19288  | 10.7125  | 17.5236   | 13.9576  |
| Sptbn2  | 4.62948  | 4.30671  | 1.07092  | 1.60867  | 0.731697 | 1.10033  | 15.6096   | 24.8326  |
| Srcin1  | 2.54088  | 2.48569  | 0.423766 | 0.189296 | 0.155898 | 0.244486 | 7.96047   | 4.7437   |

|            |           |           |          |          |          |          |          |          |
|------------|-----------|-----------|----------|----------|----------|----------|----------|----------|
| Srd5a1     | 27.2183   | 27.0549   | 114.099  | 92.5763  | 114.268  | 107.363  | 4.37413  | 4.00519  |
| Srd5a2     | 0.418964  | 0.169204  | 2.39207  | 2.34579  | 1.41258  | 1.75506  | 1.06294  | 1.30537  |
| Srxn1      | 5.61546   | 5.10929   | 28.4386  | 32.5604  | 38.1066  | 34.4561  | 28.4567  | 26.3083  |
| Ssh1       | 13.6062   | 10.1846   | 3.59969  | 4.38863  | 2.77389  | 3.40268  | 1.61473  | 1.48971  |
| St5        | 4.03882   | 5.07459   | 11.9914  | 12.5171  | 9.85366  | 10.7564  | 14.378   | 17.3719  |
| St6galnac2 | 1.11649   | 1.13313   | 10.0039  | 16.4145  | 8.35958  | 10.5584  | 122.747  | 84.1968  |
| Stambpl1   | 20.6193   | 20.0845   | 8.28756  | 6.33821  | 7.16031  | 6.82377  | 2.14599  | 1.56687  |
| Stard13    | 7.42692   | 8.22254   | 2.23005  | 2.49964  | 3.12376  | 2.76413  | 3.32743  | 4.5777   |
| Stat1      | 2.27489   | 2.24756   | 14.0992  | 30.7962  | 14.2418  | 17.8061  | 7.57071  | 7.49996  |
| Stat2      | 4.69647   | 4.59935   | 9.01738  | 18.1216  | 8.639    | 10.6836  | 10.3933  | 9.81954  |
| Stbd1      | 11.8878   | 14.5927   | 7.2857   | 5.18473  | 4.73649  | 5.51134  | 3.60739  | 6.57193  |
| Stc1       | 0.33068   | 0.278904  | 3.11344  | 1.99252  | 2.00641  | 2.31418  | 1.8328   | 1.92068  |
| Stc2       | 0.125686  | 0.0236592 | 3.95064  | 8.02301  | 5.42361  | 5.69701  | 1.64347  | 1.28596  |
| Stmn2      | 0.964499  | 1.21769   | 19.0038  | 11.4688  | 24.7635  | 20.4152  | 2.51723  | 1.37571  |
| Ston1      | 14.8646   | 13.1675   | 3.28407  | 6.29027  | 3.32175  | 3.27945  | 2.06921  | 3.34065  |
| Stra13     | 32.3317   | 34.653    | 74.125   | 50.1824  | 76.931   | 71.2231  | 194.934  | 158.8    |
| Sulf1      | 0.0280228 | 0.0263605 | 0.993887 | 1.08966  | 1.03461  | 0.930974 | 0.500649 | 0.444853 |
| Sulf2      | 0.540087  | 0.539754  | 4.1312   | 3.33989  | 5.53637  | 4.56798  | 9.78142  | 7.58264  |
| Sult1d1    | 0.0183319 | 0.0172499 | 24.6571  | 42.0932  | 14.8386  | 21.934   | 221.359  | 161.203  |
| Supt20     | 25.8837   | 26.2598   | 10.3671  | 15.8707  | 11.6442  | 11.0479  | 11.5988  | 7.46324  |
| Sv2a       | 2.73991   | 2.49569   | 0.384592 | 0.434532 | 0.633203 | 0.570637 | 7.70286  | 5.85296  |
| Syde2      | 5.41494   | 5.2301    | 1.66501  | 2.16041  | 1.97089  | 1.89037  | 2.36862  | 2.80218  |
| Syne3      | 4.29111   | 3.76329   | 1.16069  | 1.0599   | 1.19812  | 1.22574  | 0.738434 | 0.907977 |
| Syngap1    | 2.32611   | 1.76052   | 0.338929 | 0.933551 | 0.340631 | 0.64122  | 2.26618  | 0.813148 |
| Syngr3     | 24.8743   | 23.2166   | 3.55726  | 3.05442  | 2.742    | 3.56812  | 0.406644 | 0.50005  |
| Synpo      | 2.58894   | 2.67627   | 7.27735  | 8.1211   | 5.08655  | 6.23907  | 19.6597  | 12.2126  |
| Syt11      | 5.16925   | 4.63602   | 1.69963  | 2.22113  | 1.82501  | 1.56636  | 5.18527  | 4.75062  |
| Syt1l      | 0.139453  | 0.131245  | 2.03186  | 0.778462 | 1.90196  | 1.76451  | 5.94145  | 6.37157  |
| Syt12      | 2.95327   | 2.46583   | 8.85238  | 11.1047  | 7.04937  | 8.32041  | 6.13339  | 10.7041  |

|         |           |           |          |          |          |          |          |          |
|---------|-----------|-----------|----------|----------|----------|----------|----------|----------|
| Tacc1   | 5.1265    | 4.91995   | 1.56208  | 1.8053   | 1.83327  | 1.73698  | 10.963   | 14.4458  |
| Tada1   | 2.16913   | 2.43007   | 7.65649  | 6.68714  | 7.37584  | 7.67053  | 6.511    | 6.26977  |
| Taf10   | 112.675   | 110.034   | 240.394  | 180.146  | 280.238  | 253.725  | 225.386  | 214.109  |
| Tal1    | 0.141037  | 0.09476   | 1.5305   | 1.63871  | 1.44818  | 1.44527  | 0.899726 | 0.885572 |
| Tap1    | 1.48068   | 1.71034   | 10.2127  | 14.5345  | 8.06492  | 10.7766  | 7.15371  | 5.17353  |
| Tars    | 117.974   | 120.46    | 51.3699  | 49.9697  | 63.9643  | 58.0289  | 9.34284  | 12.3987  |
| Tbc1d16 | 2.95038   | 2.67953   | 0.613706 | 0.732433 | 0.584494 | 0.633516 | 9.67688  | 10.8562  |
| Tbc1d9  | 4.78717   | 5.04264   | 1.13928  | 1.26621  | 1.63221  | 1.7559   | 1.70503  | 2.54667  |
| Tbkbp1  | 1.58357   | 1.55038   | 0.384315 | 0.394944 | 0.319092 | 0.255325 | 5.0576   | 4.28908  |
| Tceal8  | 3.28093   | 3.45236   | 20.9922  | 13.2354  | 21.4646  | 18.9639  | 32.784   | 23.019   |
| Tdrkh   | 11.5713   | 12.2794   | 4.48986  | 2.17026  | 3.52441  | 3.1267   | 0.977907 | 1.32308  |
| Tecpr1  | 10.9544   | 10.0746   | 3.44979  | 4.8534   | 4.01887  | 4.34163  | 8.80549  | 6.2383   |
| Ten1    | 23.033    | 20.8593   | 57.4521  | 35.1835  | 52.281   | 53.0246  | 12.2507  | 21.757   |
| Tesc    | 0.582928  | 0.79882   | 3.70418  | 2.91602  | 2.10573  | 2.11169  | 61.536   | 80.603   |
| Tgfb3   | 0.697075  | 0.631952  | 1.8636   | 3.00427  | 1.97896  | 1.96639  | 1.05614  | 0.649604 |
| Tgm2    | 13.469    | 11.3667   | 36.0987  | 60.4131  | 20.7848  | 35.2761  | 82.3295  | 69.2708  |
| Tgtp1   | 0.216225  | 0.159847  | 6.11435  | 13.2975  | 4.49837  | 5.62307  | 1.1947   | 0.621716 |
| Tgtp2   | 0.0154037 | 0.0289861 | 0.732457 | 1.77593  | 0.553646 | 1.04254  | 2.01646  | 1.80385  |
| Thbd    | 14.0095   | 12.3692   | 3.402    | 2.16669  | 4.88067  | 3.95118  | 10.6641  | 7.94706  |
| Thbs1   | 68.5862   | 54.3444   | 10.2998  | 14.4251  | 19.144   | 15.1234  | 10.8531  | 20.6395  |
| Thbs3   | 7.77684   | 6.87122   | 1.64492  | 1.7854   | 3.017    | 2.44575  | 2.09288  | 0.89116  |
| Tiam2   | 4.64885   | 5.93713   | 1.98868  | 1.37347  | 2.82976  | 2.19725  | 1.52748  | 1.70694  |
| Tigit   | 23.986    | 19.4866   | 1.54506  | 1.29878  | 2.94621  | 1.81336  | 0        | 0        |
| Timm10b | 14.341    | 14.9534   | 34.3908  | 21.3939  | 34.6269  | 31.0524  | 34.5853  | 28.2661  |
| Timp3   | 5.47192   | 4.93491   | 0.42912  | 0.352426 | 0.469878 | 0.494862 | 233.41   | 214.332  |
| Tinag   | 2.89179   | 2.4472    | 8.5457   | 10.4684  | 7.00764  | 7.40859  | 54.708   | 47.7836  |
| Tjap1   | 38.082    | 36.3831   | 17.4817  | 15.9576  | 19.2681  | 18.4451  | 8.12836  | 8.00164  |
| Tkt     | 168.434   | 145.857   | 338.752  | 339.747  | 335.289  | 338.189  | 137.718  | 114.207  |
| Tma7    | 126.586   | 127.698   | 283.625  | 192.482  | 289.67   | 270.719  | 177.918  | 164.825  |

|           |           |           |          |          |          |           |          |          |
|-----------|-----------|-----------|----------|----------|----------|-----------|----------|----------|
| Tmbim4    | 30.1717   | 31.4617   | 75.9296  | 59.5069  | 81.9919  | 74.0539   | 563.67   | 442.372  |
| Tmc4      | 15.5518   | 16.8556   | 36.0841  | 43.7393  | 34.3983  | 36.5497   | 43.3534  | 49.8241  |
| Tmco4     | 1.65475   | 2.33517   | 5.20256  | 6.97013  | 3.95707  | 4.9014    | 8.69493  | 11.1219  |
| Tmem100   | 0.0767874 | 0.0481823 | 2.63469  | 2.57237  | 4.09439  | 3.76781   | 1.9776   | 4.30208  |
| Tmem116   | 0.649884  | 0.611788  | 3.29577  | 2.99471  | 3.13371  | 3.23961   | 37.8013  | 37.5046  |
| Tmem120b  | 6.3001    | 7.58787   | 2.5912   | 2.96463  | 2.66377  | 2.45303   | 7.46124  | 7.67493  |
| Tmem121   | 11.3017   | 10.531    | 3.12805  | 2.09856  | 2.61924  | 2.83508   | 0        | 0        |
| Tmem123   | 29.2394   | 28.4052   | 72.9618  | 108.307  | 61.9627  | 71.4958   | 25.061   | 30.9365  |
| Tmem130   | 2.32098   | 2.13893   | 0.210963 | 0.192158 | 0.216736 | 0.0556549 | 0        | 0        |
| Tmem144   | 8.28157   | 7.52177   | 2.10428  | 2.18026  | 2.38192  | 2.22075   | 2.85709  | 2.74077  |
| Tmem147   | 45.0977   | 46.0326   | 99.992   | 68.1264  | 116.984  | 98.9695   | 152.079  | 158.842  |
| Tmem158   | 6.36956   | 6.70778   | 2.42715  | 2.16207  | 3.23714  | 2.74497   | 0.620557 | 2.00289  |
| Tmem173   | 13.3212   | 13.5179   | 43.1981  | 53.7184  | 36.9358  | 44.1306   | 2.85025  | 3.06711  |
| Tmem176a  | 40.9729   | 48.5564   | 103.974  | 128.153  | 90.1707  | 102.118   | 962.869  | 680.285  |
| Tmem176b  | 122.379   | 128.569   | 284.705  | 312.245  | 278.011  | 283.206   | 999.165  | 955.411  |
| Tmem178   | 0.0267394 | 0.0503371 | 19.7128  | 18.6884  | 14.2917  | 16.3403   | 19.0679  | 13.7736  |
| Tmem200b  | 0.0340283 | 0         | 3.20376  | 3.644    | 1.56191  | 2.42741   | 4.64698  | 4.84286  |
| Tmem205   | 9.34013   | 9.5123    | 30.7975  | 17.0132  | 22.5189  | 21.8925   | 354.782  | 188.448  |
| Tmem213   | 0         | 0         | 3.44341  | 11.6807  | 2.70566  | 4.45327   | 724.99   | 565.096  |
| Tmem238   | 13.922    | 17.5279   | 34.4771  | 27.2955  | 51.442   | 41.5755   | 55.0289  | 47.3284  |
| Tmem256   | 72.8085   | 77.5185   | 202.425  | 94.5493  | 152.95   | 158.497   | 356.709  | 214.329  |
| Tmem260   | 1.0408    | 1.10803   | 2.98697  | 3.50117  | 2.48901  | 3.01023   | 4.61276  | 5.67529  |
| Tmem30b   | 1.59748   | 1.70002   | 4.45889  | 5.55057  | 3.16424  | 4.15497   | 18.1589  | 35.6157  |
| Tmem42    | 0.60748   | 0.572158  | 3.9897   | 2.6134   | 4.11825  | 4.18421   | 8.90552  | 11.0621  |
| Tmem45b   | 1.77198   | 1.64067   | 6.85046  | 4.56962  | 2.59399  | 4.65129   | 60.2294  | 50.8148  |
| Tmem63b   | 71.1625   | 66.7752   | 23.7975  | 30.6313  | 31.9758  | 29.8382   | 20.8767  | 18.8715  |
| Tmem71    | 4.25123   | 4.16645   | 1.64857  | 0.850881 | 1.07936  | 1.13677   | 1.40545  | 0.594265 |
| Tmem80    | 1.30974   | 2.02834   | 10.3155  | 9.41882  | 13.6494  | 10.3321   | 24.5065  | 26.4767  |
| Tmprss11e | 3.61159   | 3.56348   | 0.62605  | 0.280741 | 1.6218   | 1.23309   | 0        | 0        |



|          |           |           |           |         |          |          |             |           |
|----------|-----------|-----------|-----------|---------|----------|----------|-------------|-----------|
| Tmprss2  | 4.34624   | 3.34556   | 9.59581   | 19.4042 | 8.7969   | 10.8884  | 49.3011     | 45.1847   |
| Tmprss4  | 0.0972215 | 0.0731892 | 3.01136   | 5.02758 | 2.36219  | 2.79215  | 0.462583    | 0.0711131 |
| Tmsb15b1 | 0.718096  | 2.55245   | 4.37261   | 3.56419 | 6.21231  | 4.78473  | 3.59643     | 2.75159   |
| Tmsb15b2 | 0.109274  | 5.06E-07  | 2.69979   | 1.03187 | 2.58121  | 1.21065  | 0.000141692 | 1.43631   |
| Tnfrsf1b | 2.94552   | 3.03728   | 7.07051   | 11.994  | 5.4475   | 7.41963  | 0.920501    | 1.60439   |
| Tnfsf10  | 0.0170634 | 0         | 0.76374   | 1.90275 | 0.369966 | 0.815725 | 7.67184     | 10.9078   |
| Tnip3    | 0.328288  | 0.564422  | 7.18291   | 9.87998 | 6.98563  | 6.86585  | 0.134783    | 0.0829049 |
| Tnk2     | 45.5227   | 40.8536   | 19.3202   | 19.0906 | 22.9284  | 22.0078  | 12.0531     | 9.27159   |
| Tnks     | 12.0985   | 11.7887   | 2.56753   | 6.84452 | 2.81428  | 3.56367  | 1.31448     | 1.83142   |
| Tnnc2    | 20.9788   | 18.8933   | 5.50458   | 2.71708 | 9.67157  | 5.81875  | 0           | 0         |
| Tnpo2    | 44.681    | 43.0771   | 17.2485   | 21.2991 | 20.5947  | 20.6023  | 11.7788     | 8.73954   |
| Tns1     | 2.60545   | 2.60384   | 8.19607   | 13.189  | 4.93167  | 7.48619  | 102.086     | 118.919   |
| Toporsos | 4.282     | 2.78958   | 11.4856   | 8.37369 | 11.4206  | 10.9222  | 78.9846     | 46.2949   |
| Tor3a    | 6.30047   | 7.18972   | 13.3645   | 19.6006 | 14.2791  | 14.9766  | 6.96756     | 9.43768   |
| Tor4a    | 6.55346   | 6.45953   | 15.1816   | 17.1477 | 13.0806  | 14.137   | 8.70987     | 9.56975   |
| Tpgs1    | 7.02454   | 7.77363   | 21.8537   | 16.2845 | 19.181   | 19.1724  | 46.8681     | 44.7924   |
| Tprn     | 9.40937   | 8.88216   | 17.0686   | 20.3129 | 19.5514  | 19.9046  | 19.2144     | 22.3902   |
| Traf5    | 1.15617   | 0.811073  | 4.13981   | 6.17906 | 4.4564   | 5.27735  | 3.75004     | 5.38033   |
| Trappc2l | 32.9527   | 33.7317   | 78.9978   | 61.6711 | 69.5766  | 72.8785  | 57.8013     | 66.8496   |
| Trex1    | 2.92341   | 3.41799   | 8.96429   | 9.24171 | 11.9281  | 11.0857  | 21.2444     | 17.6273   |
| Trib3    | 32.2628   | 36.8507   | 10.5795   | 8.12841 | 4.94609  | 7.72239  | 0.644604    | 1.82321   |
| Trim12a  | 0.933845  | 1.58803   | 6.6377    | 6.67409 | 5.19348  | 5.0001   | 13.7785     | 13.6392   |
| Trim12c  | 0.548409  | 0.730879  | 4.71801   | 6.1805  | 3.27041  | 3.95842  | 11.3269     | 8.44231   |
| Trim14   | 1.74606   | 2.05971   | 4.64806   | 6.26797 | 2.76305  | 4.74785  | 1.27901     | 1.62249   |
| Trim21   | 1.21344   | 1.40531   | 2.99341   | 6.37887 | 3.00905  | 3.84861  | 4.16556     | 3.24457   |
| Trim30a  | 0.0226343 | 0.0106465 | 2.23934   | 5.80642 | 2.48215  | 3.32637  | 2.96439     | 2.81798   |
| Trim30d  | 0.011355  | 0         | 0.612851  | 1.70024 | 0.471064 | 0.82674  | 0.946996    | 0.527284  |
| Trim34a  | 0.997967  | 1.30507   | 4.24654   | 6.90496 | 2.9771   | 3.79035  | 4.12584     | 4.70329   |
| Trim54   | 3.38647   | 2.68008   | 0.0995487 | 0.11159 | 0.223021 | 0.140119 | 0           | 0         |

|           |          |            |          |          |          |          |          |           |
|-----------|----------|------------|----------|----------|----------|----------|----------|-----------|
| Trim65    | 0.636769 | 0.732228   | 1.84625  | 3.02573  | 2.17456  | 2.37743  | 1.93687  | 1.65739   |
| Trmt1l    | 6.33895  | 6.67149    | 14.8157  | 18.2904  | 17.9208  | 16.054   | 19.149   | 16.2599   |
| Trp53inp1 | 2.74333  | 3.85665    | 9.68507  | 6.85665  | 9.55358  | 8.76797  | 6.4612   | 5.00248   |
| Trpv6     | 0        | 0          | 1.5033   | 3.65454  | 1.04391  | 1.7415   | 0.967296 | 1.51432   |
| Tshz1     | 2.33065  | 2.55873    | 10.6845  | 17.6259  | 7.2319   | 10.5571  | 6.3175   | 5.81649   |
| Tspan2    | 2.70994  | 2.31132    | 0.288947 | 0.249862 | 0.427557 | 0.280477 | 1.74312  | 1.11146   |
| Tspan33   | 4.6283   | 5.53594    | 30.88    | 32.9835  | 18.5438  | 24.1248  | 57.3369  | 75.6742   |
| Tspan7    | 26.555   | 24.7783    | 8.69913  | 5.63323  | 8.61065  | 7.48838  | 38.8521  | 28.9047   |
| Tspan8    | 136.61   | 113.764    | 704.323  | 541.365  | 506.862  | 541.621  | 47.4485  | 85.0022   |
| Ttc30b    | 0.934407 | 0.973403   | 3.24786  | 3.47552  | 2.3577   | 3.07686  | 5.06284  | 6.41027   |
| Tub       | 2.64627  | 2.15058    | 0.592632 | 0.262268 | 0.48083  | 0.419559 | 0.084061 | 0.051714  |
| Tubb3     | 5.25466  | 5.71249    | 0.668877 | 1.00245  | 1.59645  | 1.53486  | 0.156138 | 0.0959892 |
| Tusc2     | 13.1097  | 14.1431    | 30.3274  | 27.4077  | 33.5677  | 31.4695  | 38.5427  | 45.8885   |
| Twist2    | 1.50203  | 1.27955    | 15.7285  | 13.023   | 15.7511  | 15.6445  | 0.212298 | 0.130471  |
| Uba7      | 0.31326  | 0.730396   | 5.33089  | 8.73658  | 4.18599  | 5.48208  | 4.70149  | 4.28763   |
| Ube2l6    | 6.40831  | 5.84375    | 10.9255  | 18.7138  | 11.1961  | 12.9471  | 26.895   | 19.5911   |
| Uchl1     | 129.038  | 128.928    | 29.1154  | 13.4463  | 53.8824  | 41.2232  | 10.4213  | 9.45236   |
| Ucp2      | 9.08704  | 8.25816    | 31.9391  | 32.9216  | 29.7408  | 29.8025  | 76.1358  | 68.5554   |
| Ufc1      | 38.3291  | 38.0501    | 98.8722  | 65.3369  | 94.7986  | 88.5603  | 120.275  | 95.8133   |
| Ugt1a6a   | 6.57E-11 | 8.08E-47   | 1.47451  | 3.82999  | 1.50673  | 2.06849  | 1.48436  | 1.3617    |
| Ugt1a6b   | 5.48E-07 | 0.00147718 | 1.80855  | 0.462364 | 1.50065  | 1.40487  | 348.708  | 211.528   |
| Ugt1a7c   | 0.600013 | 0.710748   | 12.8929  | 23.0622  | 18.1232  | 16.1915  | 15.4644  | 5.64381   |
| Ugt2b34   | 0.283205 | 0.146547   | 2.20765  | 2.05367  | 1.63206  | 2.06518  | 16.4327  | 7.67076   |
| Unc5b     | 28.3436  | 26.3173    | 8.92611  | 10.4943  | 9.66195  | 9.55873  | 1.40502  | 1.57156   |
| Upk1a     | 0.502444 | 0.473078   | 2.94214  | 3.84383  | 2.58252  | 2.93849  | 5.11305  | 4.05879   |
| Upk3a     | 0.131003 | 0.0411269  | 2.66253  | 1.18017  | 0.975575 | 1.78932  | 9.84156  | 1.43208   |
| Uqcr11    | 133.375  | 129.321    | 388.528  | 198.453  | 374.849  | 351.739  | 1808.39  | 1489.09   |
| Uqcrb     | 150.661  | 160.166    | 412.252  | 250.182  | 409.594  | 359.152  | 1311.34  | 1221.18   |
| Uqcrh     | 239.49   | 235.99     | 670.986  | 363.821  | 620.465  | 546.619  | 1749.06  | 1694.25   |

|         |           |           |          |          |          |          |          |          |
|---------|-----------|-----------|----------|----------|----------|----------|----------|----------|
| Urah    | 0.324956  | 0.842743  | 4.87948  | 3.49339  | 5.05108  | 3.72548  | 7.19601  | 6.77013  |
| Usp18   | 2.49739   | 2.68637   | 20.0823  | 35.9735  | 26.1965  | 25.6335  | 3.33209  | 4.74887  |
| Usp44   | 1.91387   | 1.906     | 0.601807 | 0.54545  | 0.444004 | 0.478574 | 0        | 0        |
| Usp53   | 10.7994   | 11.0664   | 2.79979  | 5.41745  | 2.66578  | 3.20126  | 2.33458  | 5.12317  |
| Vash1   | 2.65218   | 2.3228    | 0.553231 | 0.490325 | 0.603489 | 0.615202 | 1.12837  | 0.892511 |
| Vcam1   | 11.5879   | 11.0086   | 46.9461  | 73.6301  | 51.6206  | 52.6867  | 4.2827   | 3.14252  |
| Vegfa   | 57.4523   | 63.571    | 31.7522  | 18.1486  | 17.1288  | 20.6139  | 104.847  | 62.1129  |
| Vim     | 32.9991   | 24.4819   | 60.5874  | 29.7009  | 88.0669  | 66.098   | 93.8478  | 67.3749  |
| Vkorc1  | 16.0957   | 14.171    | 41.4464  | 36.359   | 35.8675  | 36.7243  | 79.2316  | 98.0366  |
| Vtcn1   | 1.09722   | 1.29831   | 5.46058  | 6.63174  | 6.07862  | 5.78181  | 0.593442 | 0.425784 |
| Wfs1    | 52.2211   | 43.3003   | 17.2793  | 17.0505  | 22.6564  | 19.1703  | 8.64677  | 15.4281  |
| Wipi1   | 33.2167   | 33.1981   | 13.4055  | 11.6394  | 11.3029  | 11.3139  | 14.2813  | 14.1208  |
| Wnk2    | 0.0361568 | 0.0509994 | 0.760395 | 2.08006  | 0.6175   | 1.05486  | 0.843563 | 0.484368 |
| Wnk4    | 0.839734  | 0.645442  | 5.56907  | 7.24281  | 5.34202  | 5.72061  | 130.418  | 119.117  |
| Wnt16   | 0.981975  | 0.949979  | 4.71048  | 9.36753  | 2.97679  | 5.16354  | 0        | 0.199283 |
| Wnt4    | 0.947984  | 0.681968  | 5.49847  | 4.71651  | 2.86067  | 4.05847  | 4.91325  | 3.02216  |
| Wnt7a   | 34.3792   | 35.5841   | 4.67647  | 3.51612  | 8.66891  | 6.24726  | 0.161365 | 0        |
| Wscd1   | 0         | 0.0298684 | 1.8957   | 1.29873  | 1.96725  | 1.9634   | 6.51639  | 7.55053  |
| Wwc2    | 31.513    | 30.8957   | 12.7508  | 17.8455  | 13.1216  | 13.0618  | 10.6282  | 17.435   |
| Wwtr1   | 40.0957   | 41.3676   | 17.9484  | 20.1504  | 19.1578  | 18.5417  | 15.2559  | 17.5416  |
| Xaf1    | 0.352571  | 0.576095  | 15.2282  | 16.6286  | 12.9902  | 14.0604  | 4.40018  | 2.55925  |
| Xpo5    | 36.4138   | 33.2166   | 11.7465  | 20.2241  | 16.9903  | 15.6973  | 5.07149  | 5.90167  |
| Yipf2   | 7.14322   | 8.01968   | 24.4233  | 19.0844  | 20.8474  | 20.671   | 34.8567  | 29.1202  |
| Zbed6   | 8.95099   | 8.05537   | 2.24272  | 6.83096  | 1.83614  | 2.73924  | 3.30959  | 1.88171  |
| Zbp1    | 0         | 0.140117  | 9.27997  | 17.0473  | 8.52388  | 9.5222   | 3.57713  | 3.43344  |
| Zbtb32  | 3.40627   | 2.48825   | 0.562698 | 0.804244 | 0.630422 | 0.593944 | 1.96405  | 1.76478  |
| Zbtb45  | 3.47767   | 3.54539   | 8.42786  | 8.18341  | 8.28906  | 8.91886  | 5.90873  | 6.96372  |
| Zbtb46  | 1.42511   | 1.3447    | 0.142991 | 0.2282   | 0.252111 | 0.257175 | 1.49703  | 1.76749  |
| Zbtb8os | 19.9317   | 22.9846   | 50.9644  | 39.465   | 44.4734  | 44.0307  | 54.3839  | 53.3852  |

|         |          |          |          |          |          |          |          |          |
|---------|----------|----------|----------|----------|----------|----------|----------|----------|
| Zc3h18  | 53.199   | 46.9245  | 17.4303  | 29.4661  | 19.7711  | 20.6984  | 16.269   | 18.6202  |
| Zc3h6   | 3.43284  | 3.71347  | 1.53651  | 0.869271 | 0.435949 | 0.700466 | 2.2998   | 2.29504  |
| Zcchc18 | 0.445109 | 0.53432  | 1.79137  | 2.85423  | 1.60715  | 1.79425  | 0.828627 | 0.452986 |
| Zfhx3   | 3.88819  | 3.31311  | 1.0198   | 1.31068  | 1.05986  | 0.979551 | 0.641144 | 0.798161 |
| Zfp105  | 0.244627 | 0.334865 | 2.43611  | 2.52402  | 2.26091  | 2.33742  | 1.45446  | 2.03248  |
| Zfp467  | 0.983475 | 0.846023 | 3.13796  | 3.95845  | 2.2      | 3.03772  | 51.0873  | 47.8709  |
| Zfp518b | 6.02172  | 5.10121  | 2.09869  | 2.23145  | 2.05     | 2.01408  | 0.802906 | 0.763406 |
| Zfp647  | 4.89002  | 5.63467  | 2.09763  | 1.74507  | 2.15264  | 1.74772  | 1.18699  | 1.53279  |
| Zfp771  | 5.81952  | 6.96783  | 17.979   | 19.5304  | 20.3242  | 18.7588  | 18.983   | 20.8005  |
| Zfp9    | 6.92936  | 6.7332   | 1.24859  | 1.10031  | 1.0901   | 1.17806  | 0.840591 | 0.556831 |
| Zfp951  | 1.93865  | 2.56763  | 0.758546 | 0.429811 | 0.68384  | 0.730833 | 0.354961 | 0.818658 |
| Zfpm1   | 7.94418  | 8.42738  | 2.45133  | 2.65     | 2.27666  | 2.45353  | 3.31828  | 5.28799  |
| Zfpm2   | 4.27311  | 5.03234  | 1.34927  | 1.42601  | 1.4391   | 1.12696  | 0.353428 | 0.621189 |
| Znfx1   | 3.61377  | 3.35272  | 7.24168  | 13.0469  | 8.20644  | 8.7767   | 22.6699  | 21.7827  |
| Znhit2  | 9.35157  | 9.26337  | 23.9139  | 17.8741  | 25.9909  | 21.6617  | 38.8522  | 35.3362  |
| Zswim4  | 19.2172  | 18.5268  | 5.94858  | 6.64178  | 5.73827  | 6.03743  | 2.78657  | 3.74963  |
| Zswim7  | 3.94326  | 4.77939  | 12.2847  | 7.76046  | 13.1272  | 10.7502  | 25.8129  | 16.6109  |

---
